# Supplementary material for: Cell type composition and circuit organization of clonally related excitatory neurons in the juvenile mouse neocortex
Source: eLife. 2020 Mar 5;9:e52951. doi: 10.7554/eLife.52951 (PMC7162653; doi:10.7554/eLife.52951)
Supplement: Figure 1—source data 1. — Number of cells and clone width for each clone analyzed at postnatal day 10 (P10). [file elife-52951-fig1-data1.xlsx]

## Sheet: Sheet1
Mouse Number	Number of Cells	Treatment age	Clone Width
1	25	E10.5	94
1	150	E10.5	234.5
1	86	E10.5	224
1	21	E10.5	101
1	54	E10.5	273
1	42	E10.5	212.5
1	34	E10.5	126
1	194	E10.5	375
1	205	E10.5	290
1	99	E10.5	157
1	123	E10.5	284
2	60	E11.5	282
2	63	E11.5	234.5
2	65	E11.5	343
2	81	E11.5	159
2	79	E11.5	222
2	39	E11.5	171.5
2	72	E11.5	276
3	53	E11.5	99.5
3	85	E11.5	184.5
3	24	E11.5	167.5
3	39	E11.5	177
3	39	E11.5	161.5
3	75	E11.5	321
3	55	E11.5	177
3	61	E11.5	244
3	22	E11.5	195
3	50	E11.5	417.5
3	118	E11.5	276
3	14	E11.5	113
3	40	E11.5	408
3	26	E11.5	280
3	49	E11.5	352
3	42	E11.5	214
3	34	E11.5	141
3	18	E11.5	151
3	32	E11.5	150
3	26	E11.5	296
3	33	E11.5	266
3	28	E11.5	162
3	22	E11.5	272.5
3	23	E11.5	304
4	81	E10.5	141
4	320	E10.5	396.5
4	342	E10.5	362.5
4	27	E10.5	146
4	99	E10.5	314
4	375	E10.5	375
4	97	E10.5	566.5
4	18	E10.5	114
4	82	E10.5	327
4	24	E10.5	193
5	417	E9.5	382.5
5	206	E9.5	311
5	570	E9.5	428
5	525	E9.5	403
5	10	E9.5	58
5	794	E9.5	604
5	1020	E9.5	683
5	288	E9.5	598
5	222	E9.5	382
5	227	E9.5	203
6	227	E9.5	457
6	296	E9.5	397
6	362	E9.5	381
6	66	E9.5	324
6	421	E9.5	348.5
6	100	E9.5	190
6	196	E9.5	346.5
6	646	E9.5	580
6	749	E9.5	411.5
6	266	E9.5	276
6	123	E9.5	386
7	24	E11.5	170
7	79	E11.5	145
7	20	E11.5	145
7	23	E11.5	250
7	15	E11.5	120
7	10	E11.5	220
7	95	E11.5	270
7	32	E11.5	270
7	27	E11.5	380
7	107	E11.5	290
7	76	E11.5	220
7	21	E11.5	230
7	28	E11.5	170
7	39	E11.5	230
7	47	E11.5	130
7	28	E11.5	255
7	34	E11.5	165
7	72	E11.5	125
7	13	E11.5	150
8	60	E10.5	210
8	26	E10.5	145
8	81	E10.5	360
8	30	E10.5	205
8	21	E10.5	125
8	60	E10.5	140
9	21	E10.5	130
9	50	E10.5	260
9	9	E10.5	140
9	125	E10.5	290
9	68	E10.5	300
9	57	E10.5	150
9	26	E10.5	290
9	39	E10.5	115
9	14	E10.5	255
9	126	E10.5	270
9	74	E10.5	120
9	224	E10.5	335
10	96	E9.5	290
10	23	E9.5	100
10	79	E9.5	160
10	145	E9.5	380
10	65	E9.5	310
10	75	E9.5	130
10	126	E9.5	360
10	83	E9.5	230
10	49	E9.5	450
10	76	E9.5	220
10	20	E9.5	250
10	53	E9.5	170
10	59	E9.5	210
10	296	E9.5	310
