# Supplementary material for: Cell type composition and circuit organization of clonally related excitatory neurons in the juvenile mouse neocortex
Source: eLife. 2020 Mar 5;9:e52951. doi: 10.7554/eLife.52951 (PMC7162653; doi:10.7554/eLife.52951)
Supplement: Figure 1—source data 2. — Number of radial glia, intermediate progenitors and proliferative units for each clone analyzed at embryonic day 12.5 (E12.5). [file elife-52951-fig1-data2.xlsx]

## Sheet: Sheet1
Animal	Age treated	Age sacrificed	Total # cells	# RGC (Pax6+/Tbr2-)	# IPCs (Pax6+/Tbr2+)	# ontogenetic columns
C5	E10.5	E12.5	4	4	0	1
C5	E10.5	E12.5	4	4	0	1
C5	E10.5	E12.5	4	4	0	1
C5	E10.5	E12.5	1	1	0	1
C5	E10.5	E12.5	2	2	0	1
C5	E10.5	E12.5	2	1	1	1
C5	E10.5	E12.5	2	2	0	1
C5	E10.5	E12.5	3	3	0	2
C5	E10.5	E12.5	2	2	0	1
C5	E10.5	E12.5	2	2	0	1
C5	E10.5	E12.5	2	2	0	1
C5	E10.5	E12.5	2	2	0	1
C5	E10.5	E12.5	3	3	0	2
C9	E10.5	E12.5	1	1	0	1
C9	E10.5	E12.5	4	4	0	2
C9	E10.5	E12.5	2	2	0	1
C9	E10.5	E12.5	4	4	0	2
C9	E10.5	E12.5	1	1	0	1
C9	E10.5	E12.5	2	1	0	1
C9	E10.5	E12.5	2	2	0	1
C9	E10.5	E12.5	4	4	0	2
C9	E10.5	E12.5	4	4	0	1
C9	E10.5	E12.5	4	4	0	1
C9	E10.5	E12.5	4	4	0	1
C11	E10.5	E12.5	2	1	0	2
C11	E10.5	E12.5	2	2	0	1
C11	E10.5	E12.5	3	3	0	1
C11	E10.5	E12.5	3	2	1	1
C11	E10.5	E12.5	5	3	0	1
C11	E10.5	E12.5	2	2	0	1
