# Supplementary material for: Cell type composition and circuit organization of clonally related excitatory neurons in the juvenile mouse neocortex
Source: eLife. 2020 Mar 5;9:e52951. doi: 10.7554/eLife.52951 (PMC7162653; doi:10.7554/eLife.52951)
Supplement: Figure 4—source data 1. — Summary of each connection included in the analyses shown in Figures 4 and 5 and Table 1, including pre- and post-synaptic cell layers, label (tdTomato-positive or -negative), firing pattern, morphology, and distance between each cell pair (tangential, vertical and Euclidean distances). [file elife-52951-fig4-data1.xlsx]

## Sheet: Sheet1
Mouse ID	Slice ID	Column ID	Presynaptic Cell ID	Presynaptic Cell Layer	Presynaptic Cell Label	Presynaptic Cell Firing Pattern	Presynaptic Cell Morphology	Postsynaptic Cell ID	Postsynaptic Cell Layer	Postsynaptic Cell Label	Postsynaptic Cell Firing Pattern	Postsynaptic Cell Morphology	Tangential Distance	Vertical Distance	Euclidean Distance
3200	j140508a	1	1	2/3	positive	pyramidal	pyramidal	2	2/3	positive	pyramidal	pyramidal	40.9741	57.3334	70.4699
3200	j140508a	1	2	2/3	positive	pyramidal	pyramidal	1	2/3	positive	pyramidal	pyramidal	40.9741	57.3334	70.4699
3200	j140508b	1	2	2/3	positive	pyramidal	pyramidal	8	2/3	positive	pyramidal	unknown	38.3467	37.4349	53.5896
3200	j140508b	1	8	2/3	positive	pyramidal	unknown	2	2/3	positive	pyramidal	pyramidal	38.3467	37.4349	53.5896
3207	j140509c	1	1	2/3	positive	pyramidal	unknown	2	2/3	positive	pyramidal	unknown	4.49863	88.6689	88.783
3207	j140509c	1	1	2/3	positive	pyramidal	unknown	8	2/3	positive	pyramidal	unknown	43.836	28.1272	52.0839
3207	j140509c	1	2	2/3	positive	pyramidal	unknown	1	2/3	positive	pyramidal	unknown	4.49863	88.6689	88.783
3207	j140509c	1	2	2/3	positive	pyramidal	unknown	8	2/3	positive	pyramidal	unknown	47.6863	60.5417	77.0668
3269	j140207a	1	1	2/3	positive	pyramidal	pyramidal	7	2/3	positive	unknown	pyramidal	64.5156	33.7835	72.8257
3269	j140207b	1	1	2/3	positive	pyramidal	pyramidal	8	2/3	positive	pyramidal	pyramidal	160.826	44.8613	166.966
3269	j140207b	1	8	2/3	positive	pyramidal	pyramidal	1	2/3	positive	pyramidal	pyramidal	160.826	44.8613	166.966
3270	j140208a	1	1	2/3	positive	pyramidal	unknown	2	2/3	positive	pyramidal	pyramidal	7.2301	153.354	153.525
3270	j140208a	1	2	2/3	positive	pyramidal	pyramidal	1	2/3	positive	pyramidal	unknown	7.2301	153.354	153.525
3270	j140208b	1	1	2/3	positive	pyramidal	pyramidal	7	2/3	positive	pyramidal	pyramidal	105.665	54.5583	118.919
3270	j140208b	1	7	2/3	positive	pyramidal	pyramidal	1	2/3	positive	pyramidal	pyramidal	105.665	54.5583	118.919
3270	j140208c	1	1	2/3	positive	pyramidal	pyramidal	2	2/3	positive	pyramidal	unknown	22.5618	139.526	141.338
3270	j140208c	1	1	2/3	positive	pyramidal	pyramidal	8	2/3	positive	pyramidal	unknown	67.1542	59.9285	90.0062
3270	j140208c	1	2	2/3	positive	pyramidal	unknown	1	2/3	positive	pyramidal	pyramidal	22.5618	139.526	141.338
3270	j140208c	1	2	2/3	positive	pyramidal	unknown	8	2/3	positive	pyramidal	unknown	89.417	199.454	218.58
3270	j140208c	1	8	2/3	positive	pyramidal	unknown	1	2/3	positive	pyramidal	pyramidal	67.1542	59.9285	90.0062
3270	j140208c	1	8	2/3	positive	pyramidal	unknown	2	2/3	positive	pyramidal	unknown	89.417	199.454	218.58
3788	j140624b	1	1	2/3	positive	pyramidal	pyramidal	7	2/3	positive	pyramidal	pyramidal	167.782	114.763	203.277
3788	j140624b	1	7	2/3	positive	pyramidal	pyramidal	1	2/3	positive	pyramidal	pyramidal	167.782	114.763	203.277
3793	j140625a	1	1	2/3	positive	pyramidal	pyramidal	7	2/3	positive	pyramidal	pyramidal	60.4351	94.9586	112.559
3793	j140625a	1	7	2/3	positive	pyramidal	pyramidal	1	2/3	positive	pyramidal	pyramidal	60.4351	94.9586	112.559
3793	j140625b	1	1	2/3	positive	pyramidal	pyramidal	2	2/3	positive	pyramidal	pyramidal	7.26155	22.2909	23.4438
3793	j140625b	1	2	2/3	positive	pyramidal	pyramidal	1	2/3	positive	pyramidal	pyramidal	7.26155	22.2909	23.4438
4009	j140801a	1	1	2/3	positive	pyramidal	unknown	2	2/3	positive	pyramidal	unknown
4009	j140801a	1	2	2/3	positive	pyramidal	unknown	1	2/3	positive	pyramidal	unknown
4312	j140911a	1	1	2/3	positive	pyramidal	pyramidal	2	2/3	positive	pyramidal	pyramidal	39.97	92.8373	101.076
4312	j140911a	1	2	2/3	positive	pyramidal	pyramidal	1	2/3	positive	pyramidal	pyramidal	39.97	92.8373	101.076
4965	j141216a	1	3B	2/3	positive	pyramidal	unknown	6	2/3	positive	pyramidal	unknown	32.8906	21.5837	39.3401
4965	j141216a	1	3B	2/3	positive	pyramidal	unknown	7	2/3	positive	pyramidal	pyramidal	40.8686	80.5044	90.284
4965	j141216a	1	6	2/3	positive	pyramidal	unknown	3B	2/3	positive	pyramidal	unknown	32.8906	21.5837	39.3401
4965	j141216a	1	6	2/3	positive	pyramidal	unknown	7	2/3	positive	pyramidal	pyramidal	8.4086	58.9207	59.5177
4965	j141216a	1	7	2/3	positive	pyramidal	pyramidal	3B	2/3	positive	pyramidal	unknown	40.8686	80.5044	90.284
4965	j141216a	1	7	2/3	positive	pyramidal	pyramidal	6	2/3	positive	pyramidal	unknown	8.4086	58.9207	59.5177
4971	j141219b	1	1B	2/3	positive	pyramidal	pyramidal	8	2/3	positive	pyramidal	unknown	20.9552	36.8249	42.3697
4971	j141219b	1	8	2/3	positive	pyramidal	unknown	1B	2/3	positive	pyramidal	pyramidal	20.9552	36.8249	42.3697
5191	j150114b	1	1	2/3	positive	pyramidal	unknown	2	2/3	positive	pyramidal	pyramidal
5191	j150114b	1	2	2/3	positive	pyramidal	pyramidal	1	2/3	positive	pyramidal	unknown
5818	j150409a	1	1	2/3	positive	pyramidal	pyramidal	6	2/3	positive	pyramidal	unknown	146.874	86.4628	170.434
5818	j150409a	1	6	2/3	positive	pyramidal	unknown	1	2/3	positive	pyramidal	pyramidal	146.874	86.4628	170.434
5818	j150409c	1	1	2/3	positive	pyramidal	pyramidal	2	2/3	positive	pyramidal	pyramidal	26.8745	142.447	144.96
5818	j150409c	1	2	2/3	positive	pyramidal	pyramidal	1	2/3	positive	pyramidal	pyramidal	26.8745	142.447	144.96
6556	j150730a	1	3	2/3	positive	pyramidal	pyramidal	7	2/3	positive	unknown	pyramidal	20.5065	111.503	113.373
6558	j150731b	1	2	2/3	positive	pyramidal	pyramidal	8	2/3	positive	pyramidal	pyramidal	97.9518	26.5499	101.486
6558	j150731b	1	8	2/3	positive	pyramidal	pyramidal	2	2/3	positive	pyramidal	pyramidal	97.9518	26.5499	101.486
7023	j150929a	1	1	2/3	positive	pyramidal	pyramidal	2	2/3	positive	pyramidal	pyramidal	33.8675	60.983	69.7562
7023	j150929a	1	2	2/3	positive	pyramidal	pyramidal	1	2/3	positive	pyramidal	pyramidal	33.8675	60.983	69.7562
7287	j151027a	1	1	2/3	positive	pyramidal	pyramidal	2	2/3	positive	pyramidal	pyramidal	70.5841	140.211	156.976
7287	j151027a	1	2	2/3	positive	pyramidal	pyramidal	1	2/3	positive	pyramidal	pyramidal	70.5841	140.211	156.976
7288	j151026a	1	1	2/3	positive	pyramidal	pyramidal	8	2/3	positive	pyramidal	pyramidal	40.5563	26.4968	48.4448
7525	j151117a	1	3	2/3	positive	pyramidal	pyramidal	7	2/3	positive	pyramidal	pyramidal	85.0299	43.9624	95.7224
7525	j151117a	1	7	2/3	positive	pyramidal	pyramidal	3	2/3	positive	pyramidal	pyramidal	85.0299	43.9624	95.7224
8780	j160217a	1	1	2/3	positive	pyramidal	pyramidal	2	2/3	positive	pyramidal	pyramidal	65.6512	28.4684	71.5578
8780	j160217a	1	2	2/3	positive	pyramidal	pyramidal	1	2/3	positive	pyramidal	pyramidal	65.6512	28.4684	71.5578
8780	j160217b	1	1	2/3	positive	pyramidal	pyramidal	8	2/3	positive	pyramidal	pyramidal	73.6561	8.67286	74.1649
8780	j160217b	1	8	2/3	positive	pyramidal	pyramidal	1	2/3	positive	pyramidal	pyramidal	73.6561	8.67286	74.1649
9972	j160512a	1	2	2/3	positive	pyramidal	pyramidal	7	2/3	positive	pyramidal	unknown	77.4643	88.807	117.845
9972	j160512a	1	2	2/3	positive	pyramidal	pyramidal	8	2/3	positive	pyramidal	unknown	95.3185	106.023	142.571
9972	j160512a	1	7	2/3	positive	pyramidal	unknown	2	2/3	positive	pyramidal	pyramidal	77.4643	88.807	117.845
9972	j160512a	1	7	2/3	positive	pyramidal	unknown	8	2/3	positive	pyramidal	unknown	17.8542	17.2156	24.8023
9972	j160512a	1	8	2/3	positive	pyramidal	unknown	2	2/3	positive	pyramidal	pyramidal	95.3185	106.023	142.571
9972	j160512a	1	8	2/3	positive	pyramidal	unknown	7	2/3	positive	pyramidal	unknown	17.8542	17.2156	24.8023
9972	j160512b	1	2	2/3	positive	pyramidal	unknown	3	2/3	positive	pyramidal	pyramidal	30.2999	60.5429	67.7018
9972	j160512b	1	3	2/3	positive	pyramidal	pyramidal	2	2/3	positive	pyramidal	unknown	30.2999	60.5429	67.7018
9981	j160517a	1	1	2/3	positive	pyramidal	pyramidal	2	2/3	positive	pyramidal	pyramidal	51.0661	70.9151	87.3882
9981	j160517a	1	1	2/3	positive	pyramidal	pyramidal	7	2/3	positive	pyramidal	unknown	65.5112	57.9879	87.4889
9981	j160517a	1	2	2/3	positive	pyramidal	pyramidal	1	2/3	positive	pyramidal	pyramidal	51.0661	70.9151	87.3882
9981	j160517a	1	2	2/3	positive	pyramidal	pyramidal	7	2/3	positive	pyramidal	unknown	116.394	12.9272	117.109
9981	j160517a	1	7	2/3	positive	pyramidal	unknown	1	2/3	positive	pyramidal	pyramidal	65.5112	57.9879	87.4889
9981	j160517a	1	7	2/3	positive	pyramidal	unknown	2	2/3	positive	pyramidal	pyramidal	116.394	12.9272	117.109
9981	j160517b	1	2	2/3	positive	pyramidal	pyramidal	6	2/3	positive	pyramidal	pyramidal	84.4996	102.657	132.961
9981	j160517b	1	2	2/3	positive	pyramidal	pyramidal	8	2/3	positive	pyramidal	pyramidal	71.2329	66.3223	97.3282
9981	j160517b	1	6	2/3	positive	pyramidal	pyramidal	2	2/3	positive	pyramidal	pyramidal	84.4996	102.657	132.961
9981	j160517b	1	6	2/3	positive	pyramidal	pyramidal	8	2/3	positive	pyramidal	pyramidal	17.7625	168.979	169.91
9981	j160517b	1	8	2/3	positive	pyramidal	pyramidal	2	2/3	positive	pyramidal	pyramidal	71.2329	66.3223	97.3282
9981	j160517b	1	8	2/3	positive	pyramidal	pyramidal	6	2/3	positive	pyramidal	pyramidal	17.7625	168.979	169.91
10390	j160620a	1	1	2/3	positive	pyramidal	unknown	2	2/3	positive	pyramidal	unknown	17.4793	56.5504	59.1901
10390	j160620a	1	1	2/3	positive	pyramidal	unknown	3	2/3	positive	pyramidal	unknown	19.4484	121.249	122.799
10390	j160620a	1	2	2/3	positive	pyramidal	unknown	1	2/3	positive	pyramidal	unknown	17.4793	56.5504	59.1901
10390	j160620a	1	2	2/3	positive	pyramidal	unknown	3	2/3	positive	pyramidal	unknown	12.9139	64.6987	65.9749
10390	j160620a	1	3	2/3	positive	pyramidal	unknown	1	2/3	positive	pyramidal	unknown	19.4484	121.249	122.799
10390	j160620a	1	3	2/3	positive	pyramidal	unknown	2	2/3	positive	pyramidal	unknown	12.9139	64.6987	65.9749
10391	j160622a	1	1	2/3	positive	pyramidal	pyramidal	7	2/3	positive	pyramidal	unknown	26.4081	66.4426	71.4983
10391	j160622a	1	7	2/3	positive	pyramidal	unknown	1	2/3	positive	pyramidal	pyramidal	26.4081	66.4426	71.4983
10391	j160622b	1	1	2/3	positive	pyramidal	pyramidal	8	2/3	positive	pyramidal	pyramidal	79.3766	15.7462	80.9234
10391	j160622b	1	8	2/3	positive	pyramidal	pyramidal	1	2/3	positive	pyramidal	pyramidal	79.3766	15.7462	80.9234
11108	j160807a	1	6	2/3	positive	pyramidal	pyramidal	7	2/3	positive	pyramidal	pyramidal	65.2042	52.6913	83.8329
11108	j160807a	1	7	2/3	positive	pyramidal	pyramidal	6	2/3	positive	pyramidal	pyramidal	65.2042	52.6913	83.8329
11508	j160929b	1	6	2/3	positive	pyramidal	pyramidal	7	2/3	positive	pyramidal	pyramidal	2.1555	263.579	263.588
11508	j160929b	1	7	2/3	positive	pyramidal	pyramidal	6	2/3	positive	pyramidal	pyramidal	2.1555	263.579	263.588
12980	j161121a	1	3	2/3	positive	pyramidal	pyramidal	7	2/3	positive	pyramidal	pyramidal	24.6218	46.4386	52.5621
12980	j161121a	1	7	2/3	positive	pyramidal	pyramidal	3	2/3	positive	pyramidal	pyramidal	24.6218	46.4386	52.5621
12980	j161121c	1	2	2/3	positive	pyramidal	pyramidal	3	2/3	positive	pyramidal	pyramidal	14.0324	25.6006	29.1941
12980	j161121c	1	2	2/3	positive	pyramidal	pyramidal	6	2/3	positive	pyramidal	pyramidal	93.6705	54.5174	108.38
12980	j161121c	1	3	2/3	positive	pyramidal	pyramidal	2	2/3	positive	pyramidal	pyramidal	14.0324	25.6006	29.1941
12980	j161121c	1	3	2/3	positive	pyramidal	pyramidal	6	2/3	positive	pyramidal	pyramidal	83.5792	28.9168	88.4402
12980	j161121c	1	6	2/3	positive	pyramidal	pyramidal	2	2/3	positive	pyramidal	pyramidal	93.6705	54.5174	108.38
12980	j161121c	1	6	2/3	positive	pyramidal	pyramidal	3	2/3	positive	pyramidal	pyramidal	83.5792	28.9168	88.4402
12984	j161123b	1	1	2/3	positive	pyramidal	pyramidal	2	2/3	positive	pyramidal	pyramidal	62.0513	17.7907	64.5513
12984	j161123b	1	2	2/3	positive	pyramidal	pyramidal	1	2/3	positive	pyramidal	pyramidal	62.0513	17.7907	64.5513
12984	j161123c	1	1	2/3	positive	pyramidal	unknown	2	2/3	positive	pyramidal	unknown	31.2538	38.4868	49.5785
12984	j161123c	1	2	2/3	positive	pyramidal	unknown	1	2/3	positive	pyramidal	unknown	31.2538	38.4868	49.5785
3200	j140508a	1	1	2/3	positive	pyramidal	pyramidal	8	2/3	negative	pyramidal	pyramidal	43.4928	25.3363	50.3344
3200	j140508a	1	2	2/3	positive	pyramidal	pyramidal	8	2/3	negative	pyramidal	pyramidal	83.0958	31.9971	89.0434
3200	j140508a	1	8	2/3	negative	pyramidal	pyramidal	1	2/3	positive	pyramidal	pyramidal	43.4928	25.3363	50.3344
3200	j140508a	1	8	2/3	negative	pyramidal	pyramidal	2	2/3	positive	pyramidal	pyramidal	83.0958	31.9971	89.0434
3200	j140508b	1	1	2/3	negative	pyramidal	unknown	2	2/3	positive	pyramidal	pyramidal	16.372	74.5101	76.2876
3200	j140508b	1	1	2/3	negative	pyramidal	unknown	8	2/3	positive	pyramidal	unknown	39.4183	37.0752	54.1144
3200	j140508b	1	2	2/3	positive	pyramidal	pyramidal	1	2/3	negative	pyramidal	unknown	16.372	74.5101	76.2876
3200	j140508b	1	2	2/3	positive	pyramidal	pyramidal	7	2/3	negative	pyramidal	unknown	34.3641	8.92417	35.504
3200	j140508b	1	7	2/3	negative	pyramidal	unknown	2	2/3	positive	pyramidal	pyramidal	34.3641	8.92417	35.504
3200	j140508b	1	7	2/3	negative	pyramidal	unknown	8	2/3	positive	pyramidal	unknown	10.122	46.359	47.4512
3200	j140508b	1	8	2/3	positive	pyramidal	unknown	1	2/3	negative	pyramidal	unknown	39.4183	37.0752	54.1144
3200	j140508b	1	8	2/3	positive	pyramidal	unknown	7	2/3	negative	pyramidal	unknown	10.122	46.359	47.4512
3207	j140509a	1	1	2/3	positive	pyramidal	pyramidal	8B	2/3	negative	pyramidal	unknown	31.6102	49.4527	58.6922
3207	j140509a	1	8B	2/3	negative	pyramidal	unknown	1	2/3	positive	pyramidal	pyramidal	31.6102	49.4527	58.6922
3207	j140509c	1	1	2/3	positive	pyramidal	unknown	7	2/3	negative	unknown	pyramidal	40.6254	150.909	156.281
3207	j140509c	1	2	2/3	positive	pyramidal	unknown	7	2/3	negative	unknown	pyramidal	44.0935	62.2398	76.276
3207	j140509c	1	7	2/3	negative	unknown	pyramidal	1	2/3	positive	pyramidal	unknown	40.6254	150.909	156.281
3207	j140509c	1	7	2/3	negative	unknown	pyramidal	2	2/3	positive	pyramidal	unknown	44.0935	62.2398	76.276
3269	j140207a	1	1	2/3	positive	pyramidal	pyramidal	8	2/3	negative	pyramidal	unknown	91.0525	6.90317	91.3138
3269	j140207c	1	1	2/3	positive	pyramidal	pyramidal	7B	2/3	negative	pyramidal	unknown	97.2747	13.7607	98.2432
3269	j140207c	1	7B	2/3	negative	pyramidal	unknown	1	2/3	positive	pyramidal	pyramidal	97.2747	13.7607	98.2432
3270	j140208a	1	1	2/3	positive	pyramidal	unknown	8	2/3	negative	pyramidal	unknown	84.3623	74.1536	112.32
3270	j140208a	1	2	2/3	positive	pyramidal	pyramidal	8	2/3	negative	pyramidal	unknown	90.9627	79.2009	120.611
3270	j140208a	1	8	2/3	negative	pyramidal	unknown	1	2/3	positive	pyramidal	unknown	84.3623	74.1536	112.32
3270	j140208a	1	8	2/3	negative	pyramidal	unknown	2	2/3	positive	pyramidal	pyramidal	90.9627	79.2009	120.611
3270	j140208b	1	1	2/3	positive	pyramidal	pyramidal	2	2/3	negative	pyramidal	pyramidal	25.8146	52.7659	58.7421
3270	j140208b	1	1	2/3	positive	pyramidal	pyramidal	8	2/3	negative	pyramidal	pyramidal	90.8791	19.586	92.9657
3270	j140208b	1	2	2/3	negative	pyramidal	pyramidal	1	2/3	positive	pyramidal	pyramidal	25.8146	52.7659	58.7421
3270	j140208b	1	2	2/3	negative	pyramidal	pyramidal	7	2/3	positive	pyramidal	pyramidal	79.8514	1.79234	79.8715
3270	j140208b	1	7	2/3	positive	pyramidal	pyramidal	2	2/3	negative	pyramidal	pyramidal	79.8514	1.79234	79.8715
3270	j140208b	1	7	2/3	positive	pyramidal	pyramidal	8	2/3	negative	pyramidal	pyramidal	14.8201	34.9723	37.9828
3270	j140208b	1	8	2/3	negative	pyramidal	pyramidal	1	2/3	positive	pyramidal	pyramidal	90.8791	19.586	92.9657
3270	j140208b	1	8	2/3	negative	pyramidal	pyramidal	7	2/3	positive	pyramidal	pyramidal	14.8201	34.9723	37.9828
3270	j140208c	1	1	2/3	positive	pyramidal	pyramidal	7	2/3	negative	pyramidal	unknown	2.06439	108.593	108.613
3270	j140208c	1	2	2/3	positive	pyramidal	unknown	7	2/3	negative	pyramidal	unknown	23.703	30.9325	38.9699
3270	j140208c	1	7	2/3	negative	pyramidal	unknown	1	2/3	positive	pyramidal	pyramidal	2.06439	108.593	108.613
3270	j140208c	1	7	2/3	negative	pyramidal	unknown	2	2/3	positive	pyramidal	unknown	23.703	30.9325	38.9699
3270	j140208c	1	7	2/3	negative	pyramidal	unknown	8	2/3	positive	pyramidal	unknown	66.4555	168.521	181.151
3270	j140208c	1	8	2/3	positive	pyramidal	unknown	7	2/3	negative	pyramidal	unknown	66.4555	168.521	181.151
3305	j140523a	1	1	2/3	positive	pyramidal	unknown	7	2/3	negative	pyramidal	pyramidal	88.0779	121.517	150.08
3305	j140523a	1	1	2/3	positive	pyramidal	unknown	8	2/3	negative	pyramidal	unknown	79.5421	34.0024	86.5049
3305	j140523a	1	7	2/3	negative	pyramidal	pyramidal	1	2/3	positive	pyramidal	unknown	88.0779	121.517	150.08
3305	j140523a	1	8	2/3	negative	pyramidal	unknown	1	2/3	positive	pyramidal	unknown	79.5421	34.0024	86.5049
3784	j140623a	1	1	2/3	positive	pyramidal	pyramidal	8	2/3	negative	pyramidal	pyramidal	122.211	1.97653	122.226
3784	j140623a	1	8	2/3	negative	pyramidal	pyramidal	1	2/3	positive	pyramidal	pyramidal	122.211	1.97653	122.226
3788	j140624a	1	1	2/3	positive	pyramidal	pyramidal	7	2/3	negative	pyramidal	pyramidal	89.3204	41.3618	98.4324
3788	j140624a	1	7	2/3	negative	pyramidal	pyramidal	1	2/3	positive	pyramidal	pyramidal	89.3204	41.3618	98.4324
3788	j140624b	1	1	2/3	positive	pyramidal	pyramidal	8	2/3	negative	pyramidal	pyramidal	68.2564	36.2683	77.2937
3788	j140624b	1	7	2/3	positive	pyramidal	pyramidal	8	2/3	negative	pyramidal	pyramidal	99.6091	78.495	126.821
3788	j140624b	1	8	2/3	negative	pyramidal	pyramidal	1	2/3	positive	pyramidal	pyramidal	68.2564	36.2683	77.2937
3788	j140624b	1	8	2/3	negative	pyramidal	pyramidal	7	2/3	positive	pyramidal	pyramidal	99.6091	78.495	126.821
3788	j140624c	1	1	2/3	positive	pyramidal	unknown	7	2/3	negative	pyramidal	unknown	36.1344	87.7327	94.8827
3788	j140624c	1	7	2/3	negative	pyramidal	unknown	1	2/3	positive	pyramidal	unknown	36.1344	87.7327	94.8827
3791	j140630a	1	1	2/3	positive	pyramidal	pyramidal	8	2/3	negative	pyramidal	pyramidal	24.4447	43.0519	49.5077
3791	j140630a	1	8	2/3	negative	pyramidal	pyramidal	1	2/3	positive	pyramidal	pyramidal	24.4447	43.0519	49.5077
3791	j140630c	1	1	2/3	positive	pyramidal	pyramidal	8	2/3	negative	pyramidal	pyramidal	55.2555	51.1351	75.2859
3791	j140630c	1	8	2/3	negative	pyramidal	pyramidal	1	2/3	positive	pyramidal	pyramidal	55.2555	51.1351	75.2859
3793	j140625a	1	1	2/3	positive	pyramidal	pyramidal	8	2/3	negative	pyramidal	pyramidal	57.9873	22.2743	62.1182
3793	j140625a	1	7	2/3	positive	pyramidal	pyramidal	8	2/3	negative	pyramidal	pyramidal	24.816	72.6843	76.8039
3793	j140625a	1	8	2/3	negative	pyramidal	pyramidal	1	2/3	positive	pyramidal	pyramidal	57.9873	22.2743	62.1182
3793	j140625a	1	8	2/3	negative	pyramidal	pyramidal	7	2/3	positive	pyramidal	pyramidal	24.816	72.6843	76.8039
3793	j140625b	1	1	2/3	positive	pyramidal	pyramidal	3	2/3	negative	pyramidal	pyramidal	21.0477	56.0437	59.8657
3793	j140625b	1	2	2/3	positive	pyramidal	pyramidal	3	2/3	negative	pyramidal	pyramidal	20.478	33.7528	39.4792
3793	j140625b	1	3	2/3	negative	pyramidal	pyramidal	1	2/3	positive	pyramidal	pyramidal	21.0477	56.0437	59.8657
3793	j140625b	1	3	2/3	negative	pyramidal	pyramidal	2	2/3	positive	pyramidal	pyramidal	20.478	33.7528	39.4792
3794	j140627a	1	1	2/3	negative	pyramidal	unknown	8	2/3	positive	pyramidal	pyramidal	101.537	8.89464	101.926
3794	j140627a	1	8	2/3	positive	pyramidal	pyramidal	1	2/3	negative	pyramidal	unknown	101.537	8.89464	101.926
3794	j140627b	1	1	2/3	positive	pyramidal	pyramidal	7	2/3	negative	pyramidal	pyramidal	17.4917	21.4594	27.6851
3794	j140627b	1	1	2/3	positive	pyramidal	pyramidal	8	2/3	negative	pyramidal	pyramidal	18.1098	48.7756	52.0291
3794	j140627b	1	7	2/3	negative	pyramidal	pyramidal	1	2/3	positive	pyramidal	pyramidal	17.4917	21.4594	27.6851
3794	j140627b	1	8	2/3	negative	pyramidal	pyramidal	1	2/3	positive	pyramidal	pyramidal	18.1098	48.7756	52.0291
3794	j140627c	1	1	2/3	positive	pyramidal	pyramidal	7	2/3	negative	pyramidal	unknown	47.3211	48.0939	67.4708
3794	j140627c	1	7	2/3	negative	pyramidal	unknown	1	2/3	positive	pyramidal	pyramidal	47.3211	48.0939	67.4708
3798	j140626a	1	1	2/3	positive	pyramidal	pyramidal	2	2/3	negative	pyramidal	unknown	8.25462	28.8249	29.9836
3798	j140626a	1	1	2/3	positive	pyramidal	pyramidal	8	2/3	negative	pyramidal	unknown	35.1807	31.4733	47.2043
3798	j140626a	1	2	2/3	negative	pyramidal	unknown	1	2/3	positive	pyramidal	pyramidal	8.25462	28.8249	29.9836
3798	j140626a	1	8	2/3	negative	pyramidal	unknown	1	2/3	positive	pyramidal	pyramidal	35.1807	31.4733	47.2043
3798	j140626b	1	1	2/3	positive	unknown	pyramidal	2	2/3	negative	pyramidal	unknown	48.7249	11.2617	50.0094
3798	j140626b	1	1	2/3	positive	unknown	pyramidal	8	2/3	negative	unknown	pyramidal	79.0971	26.7324	83.4924
3798	j140626b	1	2	2/3	negative	pyramidal	unknown	1	2/3	positive	unknown	pyramidal	48.7249	11.2617	50.0094
3798	j140626b	1	8	2/3	negative	unknown	pyramidal	1	2/3	positive	unknown	pyramidal	79.0971	26.7324	83.4924
4009	j140801a	1	1	2/3	positive	pyramidal	unknown	7	2/3	negative	pyramidal	unknown
4009	j140801a	1	1	2/3	positive	pyramidal	unknown	8	2/3	negative	pyramidal	unknown
4009	j140801a	1	2	2/3	positive	pyramidal	unknown	7	2/3	negative	pyramidal	unknown
4009	j140801a	1	2	2/3	positive	pyramidal	unknown	8	2/3	negative	pyramidal	unknown
4009	j140801a	1	7	2/3	negative	pyramidal	unknown	1	2/3	positive	pyramidal	unknown
4009	j140801a	1	7	2/3	negative	pyramidal	unknown	2	2/3	positive	pyramidal	unknown
4009	j140801a	1	8	2/3	negative	pyramidal	unknown	1	2/3	positive	pyramidal	unknown
4009	j140801a	1	8	2/3	negative	pyramidal	unknown	2	2/3	positive	pyramidal	unknown
4010	j140803a	1	1	2/3	positive	pyramidal	pyramidal	8	2/3	negative	pyramidal	pyramidal	13.19	14.6812	19.7361
4010	j140803a	1	8	2/3	negative	pyramidal	pyramidal	1	2/3	positive	pyramidal	pyramidal	13.19	14.6812	19.7361
4010	j140803b	1	2	2/3	negative	pyramidal	unknown	7	2/3	positive	pyramidal	unknown	73.2349	13.2816	74.4295
4010	j140803b	1	3	2/3	negative	pyramidal	pyramidal	7	2/3	positive	pyramidal	unknown	63.806	88.8504	109.387
4010	j140803b	1	6	2/3	negative	pyramidal	unknown	7	2/3	positive	pyramidal	unknown	18.4947	44.0805	47.8032
4010	j140803b	1	7	2/3	positive	pyramidal	unknown	2	2/3	negative	pyramidal	unknown	73.2349	13.2816	74.4295
4010	j140803b	1	7	2/3	positive	pyramidal	unknown	3	2/3	negative	pyramidal	pyramidal	63.806	88.8504	109.387
4010	j140803b	1	7	2/3	positive	pyramidal	unknown	6	2/3	negative	pyramidal	unknown	18.4947	44.0805	47.8032
4312	j140911a	1	1	2/3	positive	pyramidal	pyramidal	7	2/3	negative	pyramidal	unknown	27.0982	115.495	118.631
4312	j140911a	1	1	2/3	positive	pyramidal	pyramidal	8	2/3	negative	pyramidal	unknown	11.6534	14.8731	18.8947
4312	j140911a	1	2	2/3	positive	pyramidal	pyramidal	7	2/3	negative	pyramidal	unknown	17.7689	22.6576	28.7941
4312	j140911a	1	2	2/3	positive	pyramidal	pyramidal	8	2/3	negative	pyramidal	unknown	42.5713	77.9642	88.8298
4312	j140911a	1	7	2/3	negative	pyramidal	unknown	1	2/3	positive	pyramidal	pyramidal	27.0982	115.495	118.631
4312	j140911a	1	7	2/3	negative	pyramidal	unknown	2	2/3	positive	pyramidal	pyramidal	17.7689	22.6576	28.7941
4312	j140911a	1	8	2/3	negative	pyramidal	unknown	1	2/3	positive	pyramidal	pyramidal	11.6534	14.8731	18.8947
4312	j140911a	1	8	2/3	negative	pyramidal	unknown	2	2/3	positive	pyramidal	pyramidal	42.5713	77.9642	88.8298
4965	j141216a	1	1	2/3	negative	pyramidal	pyramidal	3B	2/3	positive	pyramidal	unknown	9.59129	152.34	152.641
4965	j141216a	1	1	2/3	negative	pyramidal	pyramidal	6	2/3	positive	pyramidal	unknown	40.0631	130.756	136.756
4965	j141216a	1	1	2/3	negative	pyramidal	pyramidal	7	2/3	positive	pyramidal	pyramidal	48.3543	71.8354	86.5937
4965	j141216a	1	2	2/3	negative	pyramidal	pyramidal	3B	2/3	positive	pyramidal	unknown	99.4409	69.9822	121.598
4965	j141216a	1	2	2/3	negative	pyramidal	pyramidal	6	2/3	positive	pyramidal	unknown	132.255	48.3985	140.833
4965	j141216a	1	2	2/3	negative	pyramidal	pyramidal	7	2/3	positive	pyramidal	pyramidal	139.98	10.5222	140.375
4965	j141216a	1	3A	2/3	negative	pyramidal	unknown	6	2/3	positive	pyramidal	unknown	28.7854	10.5785	30.6677
4965	j141216a	1	3A	2/3	negative	pyramidal	unknown	7	2/3	positive	pyramidal	pyramidal	36.4606	69.4992	78.4826
4965	j141216a	1	3B	2/3	positive	pyramidal	unknown	1	2/3	negative	pyramidal	pyramidal	9.59129	152.34	152.641
4965	j141216a	1	3B	2/3	positive	pyramidal	unknown	2	2/3	negative	pyramidal	pyramidal	99.4409	69.9822	121.598
4965	j141216a	1	3B	2/3	positive	pyramidal	unknown	8	2/3	negative	pyramidal	pyramidal	49.5953	139.404	147.963
4965	j141216a	1	6	2/3	positive	pyramidal	unknown	1	2/3	negative	pyramidal	pyramidal	40.0631	130.756	136.756
4965	j141216a	1	6	2/3	positive	pyramidal	unknown	2	2/3	negative	pyramidal	pyramidal	132.255	48.3985	140.833
4965	j141216a	1	6	2/3	positive	pyramidal	unknown	3A	2/3	negative	pyramidal	unknown	28.7854	10.5785	30.6677
4965	j141216a	1	6	2/3	positive	pyramidal	unknown	8	2/3	negative	pyramidal	pyramidal	18.4669	117.82	119.258
4965	j141216a	1	7	2/3	positive	pyramidal	pyramidal	1	2/3	negative	pyramidal	pyramidal	48.3543	71.8354	86.5937
4965	j141216a	1	7	2/3	positive	pyramidal	pyramidal	2	2/3	negative	pyramidal	pyramidal	139.98	10.5222	140.375
4965	j141216a	1	7	2/3	positive	pyramidal	pyramidal	3A	2/3	negative	pyramidal	unknown	36.4606	69.4992	78.4826
4965	j141216a	1	7	2/3	positive	pyramidal	pyramidal	8	2/3	negative	pyramidal	pyramidal	14.8507	58.8992	60.7425
4965	j141216a	1	8	2/3	negative	pyramidal	pyramidal	3B	2/3	positive	pyramidal	unknown	49.5953	139.404	147.963
4965	j141216a	1	8	2/3	negative	pyramidal	pyramidal	6	2/3	positive	pyramidal	unknown	18.4669	117.82	119.258
4965	j141216a	1	8	2/3	negative	pyramidal	pyramidal	7	2/3	positive	pyramidal	pyramidal	14.8507	58.8992	60.7425
4965	j141216b	1	1	2/3	negative	pyramidal	unknown	8	2/3	positive	pyramidal	unknown	70.8498	64.8925	96.0767
4971	j141219a	1	1	2/3	negative	pyramidal	unknown	2	2/3	positive	pyramidal	unknown	5.20467	10.3726	11.6051
4971	j141219a	1	2	2/3	positive	pyramidal	unknown	1	2/3	negative	pyramidal	unknown	5.20467	10.3726	11.6051
4971	j141219a	1	2	2/3	positive	pyramidal	unknown	8	2/3	negative	pyramidal	unknown	41.1928	13.7846	43.4381
4971	j141219a	1	8	2/3	negative	pyramidal	unknown	2	2/3	positive	pyramidal	unknown	41.1928	13.7846	43.4381
4971	j141219b	1	1B	2/3	positive	pyramidal	pyramidal	7B	2/3	negative	unknown	pyramidal	84.4444	33.1768	90.7279
4971	j141219b	1	7A	2/3	negative	pyramidal	unknown	8	2/3	positive	pyramidal	unknown	30.5175	33.4942	45.312
4971	j141219b	1	7B	2/3	negative	unknown	pyramidal	1B	2/3	positive	pyramidal	pyramidal	84.4444	33.1768	90.7279
4971	j141219b	1	7B	2/3	negative	unknown	pyramidal	8	2/3	positive	pyramidal	unknown	67.7201	3.64813	67.8183
4971	j141219b	1	8	2/3	positive	pyramidal	unknown	7A	2/3	negative	pyramidal	unknown	30.5175	33.4942	45.312
4971	j141219b	1	8	2/3	positive	pyramidal	unknown	7B	2/3	negative	unknown	pyramidal	67.7201	3.64813	67.8183
5191	j150114a	1	1	2/3	positive	pyramidal	pyramidal	2	2/3	negative	pyramidal	unknown	16.2251	83.8941	85.4487
5191	j150114a	1	1	2/3	positive	pyramidal	pyramidal	7	2/3	negative	pyramidal	unknown	104.852	59.215	120.417
5191	j150114a	1	2	2/3	negative	pyramidal	unknown	1	2/3	positive	pyramidal	pyramidal	16.2251	83.8941	85.4487
5191	j150114a	1	7	2/3	negative	pyramidal	unknown	1	2/3	positive	pyramidal	pyramidal	104.852	59.215	120.417
5191	j150114b	1	1	2/3	positive	pyramidal	unknown	7	2/3	negative	pyramidal	pyramidal
5191	j150114b	1	1	2/3	positive	pyramidal	unknown	8	2/3	negative	pyramidal	unknown
5191	j150114b	1	2	2/3	positive	pyramidal	pyramidal	7	2/3	negative	pyramidal	pyramidal	120.693	54.4191	132.394
5191	j150114b	1	2	2/3	positive	pyramidal	pyramidal	8	2/3	negative	pyramidal	unknown
5191	j150114b	1	7	2/3	negative	pyramidal	pyramidal	1	2/3	positive	pyramidal	unknown
5191	j150114b	1	7	2/3	negative	pyramidal	pyramidal	2	2/3	positive	pyramidal	pyramidal	120.693	54.4191	132.394
5191	j150114b	1	8	2/3	negative	pyramidal	unknown	1	2/3	positive	pyramidal	unknown
5191	j150114b	1	8	2/3	negative	pyramidal	unknown	2	2/3	positive	pyramidal	pyramidal
5191	j150114c	1	1	2/3	negative	pyramidal	unknown	2	2/3	positive	pyramidal	unknown
5191	j150114c	1	2	2/3	positive	pyramidal	unknown	1	2/3	negative	pyramidal	unknown
5191	j150114c	1	2	2/3	positive	pyramidal	unknown	7	2/3	negative	pyramidal	unknown
5191	j150114c	1	7	2/3	negative	pyramidal	unknown	2	2/3	positive	pyramidal	unknown
5308	j150125a	1	1	2/3	positive	pyramidal	pyramidal	8	2/3	negative	pyramidal	unknown	115.556	51.9203	126.684
5308	j150125a	1	8	2/3	negative	pyramidal	unknown	1	2/3	positive	pyramidal	pyramidal	115.556	51.9203	126.684
5541	j150224a	1	1	2/3	positive	pyramidal	pyramidal	8	2/3	negative	pyramidal	unknown	112.612	19.7655	114.333
5541	j150224a	1	8	2/3	negative	pyramidal	unknown	1	2/3	positive	pyramidal	pyramidal	112.612	19.7655	114.333
5818	j150409a	1	1	2/3	positive	pyramidal	pyramidal	2	2/3	negative	pyramidal	pyramidal	2.92201	59.7053	59.7768
5818	j150409a	1	1	2/3	positive	pyramidal	pyramidal	7	2/3	negative	pyramidal	pyramidal	100.451	51.7194	112.983
5818	j150409a	1	1	2/3	positive	pyramidal	pyramidal	8	2/3	negative	pyramidal	pyramidal	150.914	24.5104	152.891
5818	j150409a	1	2	2/3	negative	pyramidal	pyramidal	1	2/3	positive	pyramidal	pyramidal	2.92201	59.7053	59.7768
5818	j150409a	1	2	2/3	negative	pyramidal	pyramidal	6	2/3	positive	pyramidal	unknown	143.981	26.7575	146.446
5818	j150409a	1	6	2/3	positive	pyramidal	unknown	2	2/3	negative	pyramidal	pyramidal	143.981	26.7575	146.446
5818	j150409a	1	6	2/3	positive	pyramidal	unknown	7	2/3	negative	pyramidal	pyramidal	46.5301	34.7434	58.0703
5818	j150409a	1	6	2/3	positive	pyramidal	unknown	8	2/3	negative	pyramidal	pyramidal	6.87631	110.973	111.186
5818	j150409a	1	7	2/3	negative	pyramidal	pyramidal	1	2/3	positive	pyramidal	pyramidal	100.451	51.7194	112.983
5818	j150409a	1	7	2/3	negative	pyramidal	pyramidal	6	2/3	positive	pyramidal	unknown	46.5301	34.7434	58.0703
6556	j150730a	1	1	2/3	negative	pyramidal	pyramidal	3	2/3	positive	pyramidal	pyramidal	9.07932	151.887	152.158
6556	j150730a	1	1	2/3	negative	pyramidal	pyramidal	7	2/3	positive	unknown	pyramidal	29.1985	40.3838	49.8337
6556	j150730a	1	2	2/3	negative	pyramidal	pyramidal	3	2/3	positive	pyramidal	pyramidal	58.5738	82.5377	101.209
6556	j150730a	1	2	2/3	negative	pyramidal	pyramidal	7	2/3	positive	unknown	pyramidal	65.8411	28.9656	71.9309
6556	j150730a	1	3	2/3	positive	pyramidal	pyramidal	1	2/3	negative	pyramidal	pyramidal	9.07932	151.887	152.158
6556	j150730a	1	3	2/3	positive	pyramidal	pyramidal	2	2/3	negative	pyramidal	pyramidal	58.5738	82.5377	101.209
6556	j150730a	1	3	2/3	positive	pyramidal	pyramidal	6	2/3	negative	unknown	pyramidal	77.8738	51.3301	93.269
6558	j150731a	1	1	2/3	negative	pyramidal	pyramidal	2	2/3	positive	pyramidal	pyramidal	20.7377	34.0463	39.8648
6558	j150731a	1	2	2/3	positive	pyramidal	pyramidal	1	2/3	negative	pyramidal	pyramidal	20.7377	34.0463	39.8648
6558	j150731a	1	2	2/3	positive	pyramidal	pyramidal	7	2/3	negative	pyramidal	pyramidal	100.918	12.9063	101.74
6558	j150731b	1	1	2/3	negative	pyramidal	pyramidal	2	2/3	positive	pyramidal	pyramidal	57.1106	69.9816	90.3275
6558	j150731b	1	1	2/3	negative	pyramidal	pyramidal	8	2/3	positive	pyramidal	pyramidal	40.8458	43.4317	59.6213
6558	j150731b	1	2	2/3	positive	pyramidal	pyramidal	1	2/3	negative	pyramidal	pyramidal	57.1106	69.9816	90.3275
6558	j150731b	1	2	2/3	positive	pyramidal	pyramidal	7	2/3	negative	pyramidal	pyramidal	98.4543	125.655	159.632
6558	j150731b	1	7	2/3	negative	pyramidal	pyramidal	2	2/3	positive	pyramidal	pyramidal	98.4543	125.655	159.632
6558	j150731b	1	7	2/3	negative	pyramidal	pyramidal	8	2/3	positive	pyramidal	pyramidal	0.682142	152.205	152.206
6558	j150731b	1	8	2/3	positive	pyramidal	pyramidal	1	2/3	negative	pyramidal	pyramidal	40.8458	43.4317	59.6213
6558	j150731b	1	8	2/3	positive	pyramidal	pyramidal	7	2/3	negative	pyramidal	pyramidal	0.682142	152.205	152.206
6558	j150731c	1	8	2/3	positive	pyramidal	pyramidal	1	2/3	negative	pyramidal	pyramidal	171.002	20.1579	172.186
7023	j150929a	1	1	2/3	positive	pyramidal	pyramidal	7	2/3	negative	pyramidal	pyramidal	130.806	3.13517	130.843
7023	j150929a	1	1	2/3	positive	pyramidal	pyramidal	8	2/3	negative	pyramidal	pyramidal	68.1754	16.4116	70.123
7023	j150929a	1	2	2/3	positive	pyramidal	pyramidal	7	2/3	negative	pyramidal	pyramidal	163.749	64.1181	175.855
7023	j150929a	1	2	2/3	positive	pyramidal	pyramidal	8	2/3	negative	pyramidal	pyramidal	100.937	77.3946	127.193
7023	j150929a	1	7	2/3	negative	pyramidal	pyramidal	1	2/3	positive	pyramidal	pyramidal	130.806	3.13517	130.843
7023	j150929a	1	7	2/3	negative	pyramidal	pyramidal	2	2/3	positive	pyramidal	pyramidal	163.749	64.1181	175.855
7023	j150929a	1	8	2/3	negative	pyramidal	pyramidal	1	2/3	positive	pyramidal	pyramidal	68.1754	16.4116	70.123
7023	j150929a	1	8	2/3	negative	pyramidal	pyramidal	2	2/3	positive	pyramidal	pyramidal	100.937	77.3946	127.193
7024	j150925b	1	1	2/3	positive	pyramidal	pyramidal	2	2/3	negative	pyramidal	pyramidal	29.5044	181.996	184.372
7024	j150925b	1	1	2/3	positive	pyramidal	pyramidal	3	2/3	negative	pyramidal	pyramidal	20.1197	189.737	190.8
7024	j150925b	1	2	2/3	negative	pyramidal	pyramidal	1	2/3	positive	pyramidal	pyramidal	29.5044	181.996	184.372
7024	j150925b	1	3	2/3	negative	pyramidal	pyramidal	1	2/3	positive	pyramidal	pyramidal	20.1197	189.737	190.8
7287	j151027a	1	1	2/3	positive	pyramidal	pyramidal	8	2/3	negative	pyramidal	pyramidal	10.95	85.2791	85.9793
7287	j151027a	1	2	2/3	positive	pyramidal	pyramidal	8	2/3	negative	pyramidal	pyramidal	60.4324	54.9321	81.6677
7287	j151027a	1	8	2/3	negative	pyramidal	pyramidal	1	2/3	positive	pyramidal	pyramidal	10.95	85.2791	85.9793
7287	j151027a	1	8	2/3	negative	pyramidal	pyramidal	2	2/3	positive	pyramidal	pyramidal	60.4324	54.9321	81.6677
7525	j151117a	1	2	2/3	negative	pyramidal	pyramidal	3	2/3	positive	pyramidal	pyramidal	24.7928	61.9205	66.6996
7525	j151117a	1	2	2/3	negative	pyramidal	pyramidal	7	2/3	positive	pyramidal	pyramidal	60.7522	17.9582	63.3508
7525	j151117a	1	3	2/3	positive	pyramidal	pyramidal	2	2/3	negative	pyramidal	pyramidal	24.7928	61.9205	66.6996
7525	j151117a	1	3	2/3	positive	pyramidal	pyramidal	6	2/3	negative	pyramidal	pyramidal	76.7225	1.26897	76.733
7525	j151117a	1	6	2/3	negative	pyramidal	pyramidal	3	2/3	positive	pyramidal	pyramidal	76.7225	1.26897	76.733
7525	j151117a	1	6	2/3	negative	pyramidal	pyramidal	7	2/3	positive	pyramidal	pyramidal	10.8341	45.2314	46.5108
7525	j151117a	1	7	2/3	positive	pyramidal	pyramidal	2	2/3	negative	pyramidal	pyramidal	60.7522	17.9582	63.3508
7525	j151117a	1	7	2/3	positive	pyramidal	pyramidal	6	2/3	negative	pyramidal	pyramidal	10.8341	45.2314	46.5108
8780	j160217a	1	1	2/3	positive	pyramidal	pyramidal	6	2/3	negative	pyramidal	pyramidal	61.8625	70.1522	93.5323
8780	j160217a	1	2	2/3	positive	pyramidal	pyramidal	6	2/3	negative	pyramidal	pyramidal	9.63719	41.6838	42.7833
8780	j160217a	1	6	2/3	negative	pyramidal	pyramidal	1	2/3	positive	pyramidal	pyramidal	61.8625	70.1522	93.5323
8780	j160217a	1	6	2/3	negative	pyramidal	pyramidal	2	2/3	positive	pyramidal	pyramidal	9.63719	41.6838	42.7833
9972	j160512a	1	2	2/3	positive	pyramidal	pyramidal	3	2/3	negative	pyramidal	pyramidal	47.5288	42.0071	63.4317
9972	j160512a	1	2	2/3	positive	pyramidal	pyramidal	6	2/3	negative	pyramidal	pyramidal	81.6594	11.3104	82.4389
9972	j160512a	1	3	2/3	negative	pyramidal	pyramidal	2	2/3	positive	pyramidal	pyramidal	47.5288	42.0071	63.4317
9972	j160512a	1	3	2/3	negative	pyramidal	pyramidal	7	2/3	positive	pyramidal	unknown	34.6297	46.7998	58.2189
9972	j160512a	1	3	2/3	negative	pyramidal	pyramidal	8	2/3	positive	pyramidal	unknown	51.5556	64.0155	82.1947
9972	j160512a	1	6	2/3	negative	pyramidal	pyramidal	2	2/3	positive	pyramidal	pyramidal	81.6594	11.3104	82.4389
9972	j160512a	1	6	2/3	negative	pyramidal	pyramidal	7	2/3	positive	pyramidal	unknown	5.47613	77.4966	77.6898
9972	j160512a	1	6	2/3	negative	pyramidal	pyramidal	8	2/3	positive	pyramidal	unknown	14.2175	94.7122	95.7734
9972	j160512a	1	7	2/3	positive	pyramidal	unknown	3	2/3	negative	pyramidal	pyramidal	34.6297	46.7998	58.2189
9972	j160512a	1	7	2/3	positive	pyramidal	unknown	6	2/3	negative	pyramidal	pyramidal	5.47613	77.4966	77.6898
9972	j160512a	1	8	2/3	positive	pyramidal	unknown	3	2/3	negative	pyramidal	pyramidal	51.5556	64.0155	82.1947
9972	j160512a	1	8	2/3	positive	pyramidal	unknown	6	2/3	negative	pyramidal	pyramidal	14.2175	94.7122	95.7734
9972	j160512b	1	2	2/3	positive	pyramidal	unknown	6	2/3	negative	pyramidal	pyramidal	11.3228	66.0075	66.9716
9972	j160512b	1	2	2/3	positive	pyramidal	unknown	7	2/3	negative	pyramidal	unknown	8.21138	17.4504	19.2858
9972	j160512b	1	3	2/3	positive	pyramidal	pyramidal	6	2/3	negative	pyramidal	pyramidal	19.0039	5.46458	19.774
9972	j160512b	1	3	2/3	positive	pyramidal	pyramidal	7	2/3	negative	pyramidal	unknown	38.1161	43.0925	57.5309
9972	j160512b	1	6	2/3	negative	pyramidal	pyramidal	2	2/3	positive	pyramidal	unknown	11.3228	66.0075	66.9716
9972	j160512b	1	6	2/3	negative	pyramidal	pyramidal	3	2/3	positive	pyramidal	pyramidal	19.0039	5.46458	19.774
9972	j160512b	1	7	2/3	negative	pyramidal	unknown	2	2/3	positive	pyramidal	unknown	8.21138	17.4504	19.2858
9972	j160512b	1	7	2/3	negative	pyramidal	unknown	3	2/3	positive	pyramidal	pyramidal	38.1161	43.0925	57.5309
9981	j160517a	1	1	2/3	positive	pyramidal	pyramidal	6	2/3	negative	pyramidal	pyramidal	49.0069	106.642	117.364
9981	j160517a	1	1	2/3	positive	pyramidal	pyramidal	8	2/3	negative	pyramidal	pyramidal	58.2698	4.94119	58.4789
9981	j160517a	1	2	2/3	positive	pyramidal	pyramidal	6	2/3	negative	pyramidal	pyramidal	99.5679	35.7273	105.784
9981	j160517a	1	2	2/3	positive	pyramidal	pyramidal	8	2/3	negative	pyramidal	pyramidal	109.059	65.9739	127.462
9981	j160517a	1	6	2/3	negative	pyramidal	pyramidal	1	2/3	positive	pyramidal	pyramidal	49.0069	106.642	117.364
9981	j160517a	1	6	2/3	negative	pyramidal	pyramidal	2	2/3	positive	pyramidal	pyramidal	99.5679	35.7273	105.784
9981	j160517a	1	6	2/3	negative	pyramidal	pyramidal	7	2/3	positive	pyramidal	unknown	17.2393	48.6545	51.6184
9981	j160517a	1	7	2/3	positive	pyramidal	unknown	6	2/3	negative	pyramidal	pyramidal	17.2393	48.6545	51.6184
9981	j160517a	1	7	2/3	positive	pyramidal	unknown	8	2/3	negative	pyramidal	pyramidal	7.46667	53.0467	53.5696
9981	j160517a	1	8	2/3	negative	pyramidal	pyramidal	1	2/3	positive	pyramidal	pyramidal	58.2698	4.94119	58.4789
9981	j160517a	1	8	2/3	negative	pyramidal	pyramidal	2	2/3	positive	pyramidal	pyramidal	109.059	65.9739	127.462
9981	j160517a	1	8	2/3	negative	pyramidal	pyramidal	7	2/3	positive	pyramidal	unknown	7.46667	53.0467	53.5696
9981	j160517b	1	2	2/3	positive	pyramidal	pyramidal	3	2/3	negative	pyramidal	pyramidal	18.6436	85.9582	87.9568
9981	j160517b	1	2	2/3	positive	pyramidal	pyramidal	7	2/3	negative	pyramidal	pyramidal	7.93383	42.5287	43.2624
9981	j160517b	1	3	2/3	negative	pyramidal	pyramidal	2	2/3	positive	pyramidal	pyramidal	18.6436	85.9582	87.9568
9981	j160517b	1	3	2/3	negative	pyramidal	pyramidal	6	2/3	positive	pyramidal	pyramidal	102.261	16.6985	103.615
9981	j160517b	1	3	2/3	negative	pyramidal	pyramidal	8	2/3	positive	pyramidal	pyramidal	89.6147	152.281	176.692
9981	j160517b	1	6	2/3	positive	pyramidal	pyramidal	3	2/3	negative	pyramidal	pyramidal	102.261	16.6985	103.615
9981	j160517b	1	6	2/3	positive	pyramidal	pyramidal	7	2/3	negative	pyramidal	pyramidal	83.3248	60.1281	102.754
9981	j160517b	1	7	2/3	negative	pyramidal	pyramidal	2	2/3	positive	pyramidal	pyramidal	7.93383	42.5287	43.2624
9981	j160517b	1	7	2/3	negative	pyramidal	pyramidal	6	2/3	positive	pyramidal	pyramidal	83.3248	60.1281	102.754
9981	j160517b	1	7	2/3	negative	pyramidal	pyramidal	8	2/3	positive	pyramidal	pyramidal	71.3349	108.851	130.143
9981	j160517b	1	8	2/3	positive	pyramidal	pyramidal	3	2/3	negative	pyramidal	pyramidal	89.6147	152.281	176.692
9981	j160517b	1	8	2/3	positive	pyramidal	pyramidal	7	2/3	negative	pyramidal	pyramidal	71.3349	108.851	130.143
10390	j160620a	1	1	2/3	positive	pyramidal	unknown	7	2/3	negative	pyramidal	unknown	40.3417	67.877	78.9603
10390	j160620a	1	1	2/3	positive	pyramidal	unknown	8	2/3	negative	pyramidal	unknown	57.7692	13.7968	59.3939
10390	j160620a	1	2	2/3	positive	pyramidal	unknown	7	2/3	negative	pyramidal	unknown	40.8846	11.3266	42.4245
10390	j160620a	1	2	2/3	positive	pyramidal	unknown	8	2/3	negative	pyramidal	unknown	68.7221	70.3472	98.3436
10390	j160620a	1	3	2/3	positive	pyramidal	unknown	7	2/3	negative	pyramidal	unknown	52.7818	53.3721	75.0633
10390	j160620a	1	3	2/3	positive	pyramidal	unknown	8	2/3	negative	pyramidal	unknown	76.5661	135.046	155.241
10390	j160620a	1	7	2/3	negative	pyramidal	unknown	1	2/3	positive	pyramidal	unknown	40.3417	67.877	78.9603
10390	j160620a	1	7	2/3	negative	pyramidal	unknown	2	2/3	positive	pyramidal	unknown	40.8846	11.3266	42.4245
10390	j160620a	1	7	2/3	negative	pyramidal	unknown	3	2/3	positive	pyramidal	unknown	52.7818	53.3721	75.0633
10390	j160620a	1	8	2/3	negative	pyramidal	unknown	1	2/3	positive	pyramidal	unknown	57.7692	13.7968	59.3939
10390	j160620a	1	8	2/3	negative	pyramidal	unknown	2	2/3	positive	pyramidal	unknown	68.7221	70.3472	98.3436
10390	j160620a	1	8	2/3	negative	pyramidal	unknown	3	2/3	positive	pyramidal	unknown	76.5661	135.046	155.241
10390	j160620b	1	2	2/3	negative	pyramidal	unknown	8	2/3	positive	pyramidal	pyramidal	74.866	10.1647	75.5529
10390	j160620b	1	8	2/3	positive	pyramidal	pyramidal	2	2/3	negative	pyramidal	unknown	74.866	10.1647	75.5529
10391	j160622a	1	1	2/3	positive	pyramidal	pyramidal	2	2/3	negative	pyramidal	pyramidal	47.8483	89.2678	101.283
10391	j160622a	1	1	2/3	positive	pyramidal	pyramidal	8	2/3	negative	pyramidal	pyramidal	11.5695	27.7473	30.0626
10391	j160622a	1	2	2/3	negative	pyramidal	pyramidal	1	2/3	positive	pyramidal	pyramidal	47.8483	89.2678	101.283
10391	j160622a	1	2	2/3	negative	pyramidal	pyramidal	7	2/3	positive	pyramidal	unknown	74.2544	22.8252	77.6834
10391	j160622a	1	7	2/3	positive	pyramidal	unknown	2	2/3	negative	pyramidal	pyramidal	74.2544	22.8252	77.6834
10391	j160622a	1	7	2/3	positive	pyramidal	unknown	8	2/3	negative	pyramidal	pyramidal	15.9449	38.6953	41.8517
10391	j160622a	1	8	2/3	negative	pyramidal	pyramidal	1	2/3	positive	pyramidal	pyramidal	11.5695	27.7473	30.0626
10391	j160622a	1	8	2/3	negative	pyramidal	pyramidal	7	2/3	positive	pyramidal	unknown	15.9449	38.6953	41.8517
10391	j160622b	1	1	2/3	positive	pyramidal	pyramidal	2	2/3	negative	pyramidal	pyramidal	46.9298	30.5448	55.9946
10391	j160622b	1	1	2/3	positive	pyramidal	pyramidal	3	2/3	negative	pyramidal	unknown
10391	j160622b	1	1	2/3	positive	pyramidal	pyramidal	6	2/3	negative	pyramidal	pyramidal	92.158	66.3842	113.578
10391	j160622b	1	2	2/3	negative	pyramidal	pyramidal	1	2/3	positive	pyramidal	pyramidal	46.9298	30.5448	55.9946
10391	j160622b	1	2	2/3	negative	pyramidal	pyramidal	8	2/3	positive	pyramidal	pyramidal	32.4469	14.7986	35.6623
10391	j160622b	1	3	2/3	negative	pyramidal	unknown	1	2/3	positive	pyramidal	pyramidal
10391	j160622b	1	3	2/3	negative	pyramidal	unknown	8	2/3	positive	pyramidal	pyramidal
10391	j160622b	1	6	2/3	negative	pyramidal	pyramidal	1	2/3	positive	pyramidal	pyramidal	92.158	66.3842	113.578
10391	j160622b	1	6	2/3	negative	pyramidal	pyramidal	8	2/3	positive	pyramidal	pyramidal	13.5862	50.638	52.4289
10391	j160622b	1	8	2/3	positive	pyramidal	pyramidal	2	2/3	negative	pyramidal	pyramidal	32.4469	14.7986	35.6623
10391	j160622b	1	8	2/3	positive	pyramidal	pyramidal	6	2/3	negative	pyramidal	pyramidal	13.5862	50.638	52.4289
11108	j160807a	1	1	2/3	negative	pyramidal	pyramidal	6	2/3	positive	pyramidal	pyramidal	73.7927	40.7603	84.3017
11108	j160807a	1	1	2/3	negative	pyramidal	pyramidal	7	2/3	positive	pyramidal	pyramidal	137.526	11.931	138.043
11108	j160807a	1	6	2/3	positive	pyramidal	pyramidal	1	2/3	negative	pyramidal	pyramidal	73.7927	40.7603	84.3017
11108	j160807a	1	7	2/3	positive	pyramidal	pyramidal	1	2/3	negative	pyramidal	pyramidal	137.526	11.931	138.043
11508	j160929b	1	2	2/3	negative	pyramidal	pyramidal	6	2/3	positive	pyramidal	pyramidal	37.4622	215.902	219.128
11508	j160929b	1	2	2/3	negative	pyramidal	pyramidal	7	2/3	positive	pyramidal	pyramidal	35.3962	47.6772	59.3802
11508	j160929b	1	3	2/3	negative	pyramidal	pyramidal	6	2/3	positive	pyramidal	pyramidal	75.0592	45.6895	87.8716
11508	j160929b	1	3	2/3	negative	pyramidal	pyramidal	7	2/3	positive	pyramidal	pyramidal	72.932	217.89	229.772
11508	j160929b	1	6	2/3	positive	pyramidal	pyramidal	2	2/3	negative	pyramidal	pyramidal	37.4622	215.902	219.128
11508	j160929b	1	6	2/3	positive	pyramidal	pyramidal	3	2/3	negative	pyramidal	pyramidal	75.0592	45.6895	87.8716
11508	j160929b	1	7	2/3	positive	pyramidal	pyramidal	2	2/3	negative	pyramidal	pyramidal	35.3962	47.6772	59.3802
11508	j160929b	1	7	2/3	positive	pyramidal	pyramidal	3	2/3	negative	pyramidal	pyramidal	72.932	217.89	229.772
12980	j161121a	1	2	2/3	negative	pyramidal	pyramidal	3	2/3	positive	pyramidal	pyramidal	31.4807	43.2917	53.5277
12980	j161121a	1	2	2/3	negative	pyramidal	pyramidal	7	2/3	positive	pyramidal	pyramidal	35.7691	3.14686	35.9073
12980	j161121a	1	3	2/3	positive	pyramidal	pyramidal	2	2/3	negative	pyramidal	pyramidal	31.4807	43.2917	53.5277
12980	j161121a	1	3	2/3	positive	pyramidal	pyramidal	4	2/3	negative	pyramidal	pyramidal	9.35193	56.4366	57.2061
12980	j161121a	1	4	2/3	negative	pyramidal	pyramidal	3	2/3	positive	pyramidal	pyramidal	9.35193	56.4366	57.2061
12980	j161121a	1	4	2/3	negative	pyramidal	pyramidal	7	2/3	positive	pyramidal	pyramidal	19.0681	102.875	104.627
12980	j161121a	1	7	2/3	positive	pyramidal	pyramidal	2	2/3	negative	pyramidal	pyramidal	35.7691	3.14686	35.9073
12980	j161121a	1	7	2/3	positive	pyramidal	pyramidal	4	2/3	negative	pyramidal	pyramidal	19.0681	102.875	104.627
12980	j161121b	1	2	2/3	positive	pyramidal	unknown	4	2/3	negative	pyramidal	unknown
12980	j161121b	1	2	2/3	positive	pyramidal	unknown	6	2/3	negative	pyramidal	unknown
12980	j161121b	1	2	2/3	positive	pyramidal	unknown	7	2/3	negative	pyramidal	unknown
12980	j161121b	1	4	2/3	negative	pyramidal	unknown	2	2/3	positive	pyramidal	unknown
12980	j161121b	1	6	2/3	negative	pyramidal	unknown	2	2/3	positive	pyramidal	unknown
12980	j161121b	1	7	2/3	negative	pyramidal	unknown	2	2/3	positive	pyramidal	unknown
12980	j161121c	1	2	2/3	positive	pyramidal	pyramidal	7	2/3	negative	pyramidal	pyramidal	6.51315	26.5124	27.3007
12980	j161121c	1	3	2/3	positive	pyramidal	pyramidal	7	2/3	negative	pyramidal	pyramidal	10.0567	52.113	53.0745
12980	j161121c	1	6	2/3	positive	pyramidal	pyramidal	7	2/3	negative	pyramidal	pyramidal	92.9691	81.0298	123.325
12980	j161121c	1	7	2/3	negative	pyramidal	pyramidal	2	2/3	positive	pyramidal	pyramidal	6.51315	26.5124	27.3007
12980	j161121c	1	7	2/3	negative	pyramidal	pyramidal	3	2/3	positive	pyramidal	pyramidal	10.0567	52.113	53.0745
12980	j161121c	1	7	2/3	negative	pyramidal	pyramidal	6	2/3	positive	pyramidal	pyramidal	92.9691	81.0298	123.325
12981	j161122a	1	2	2/3	positive	pyramidal	unknown	7	2/3	negative	pyramidal	unknown	46.3531	22.9023	51.7023
12981	j161122a	1	7	2/3	negative	pyramidal	unknown	2	2/3	positive	pyramidal	unknown	46.3531	22.9023	51.7023
12983	j161123a	1	2	2/3	negative	pyramidal	pyramidal	3	2/3	positive	pyramidal	unknown	25.2963	76.2578	80.344
12983	j161123a	1	3	2/3	positive	pyramidal	unknown	2	2/3	negative	pyramidal	pyramidal	25.2963	76.2578	80.344
12983	j161123a	1	3	2/3	positive	pyramidal	unknown	6	2/3	negative	pyramidal	unknown	73.3035	14.106	74.6484
12983	j161123a	1	6	2/3	negative	pyramidal	unknown	3	2/3	positive	pyramidal	unknown	73.3035	14.106	74.6484
12984	j161123b	1	1	2/3	positive	pyramidal	pyramidal	8	2/3	negative	pyramidal	pyramidal	119.47	28.0822	122.726
12984	j161123b	1	2	2/3	positive	pyramidal	pyramidal	8	2/3	negative	pyramidal	pyramidal	57.8171	10.2915	58.7259
12984	j161123b	1	8	2/3	negative	pyramidal	pyramidal	1	2/3	positive	pyramidal	pyramidal	119.47	28.0822	122.726
12984	j161123b	1	8	2/3	negative	pyramidal	pyramidal	2	2/3	positive	pyramidal	pyramidal	57.8171	10.2915	58.7259
12984	j161123c	1	1	2/3	positive	pyramidal	unknown	7	2/3	negative	pyramidal	pyramidal	53.5677	130.605	141.164
12984	j161123c	1	1	2/3	positive	pyramidal	unknown	8	2/3	negative	pyramidal	pyramidal	13.1446	6.89544	14.8435
12984	j161123c	1	2	2/3	positive	pyramidal	unknown	7	2/3	negative	pyramidal	pyramidal	82.3408	169.092	188.075
12984	j161123c	1	2	2/3	positive	pyramidal	unknown	8	2/3	negative	pyramidal	pyramidal	42.6342	45.3822	62.2673
12984	j161123c	1	7	2/3	negative	pyramidal	pyramidal	1	2/3	positive	pyramidal	unknown	53.5677	130.605	141.164
12984	j161123c	1	7	2/3	negative	pyramidal	pyramidal	2	2/3	positive	pyramidal	unknown	82.3408	169.092	188.075
12984	j161123c	1	8	2/3	negative	pyramidal	pyramidal	1	2/3	positive	pyramidal	unknown	13.1446	6.89544	14.8435
12984	j161123c	1	8	2/3	negative	pyramidal	pyramidal	2	2/3	positive	pyramidal	unknown	42.6342	45.3822	62.2673
3200	j140508a	1	1	2/3	positive	pyramidal	pyramidal	3	4	positive	pyramidal	unknown	37.9613	182.299	186.21
3200	j140508a	1	1	2/3	positive	pyramidal	pyramidal	7	4	positive	pyramidal	unknown	19.6868	94.511	96.5396
3200	j140508a	1	2	2/3	positive	pyramidal	pyramidal	3	4	positive	pyramidal	unknown	4.34532	124.966	125.041
3200	j140508a	1	2	2/3	positive	pyramidal	pyramidal	7	4	positive	pyramidal	unknown	59.2789	37.1776	69.9725
3200	j140508b	1	2	2/3	positive	pyramidal	pyramidal	6	4	positive	pyramidal	pyramidal	44.8479	200.963	205.907
3200	j140508b	1	8	2/3	positive	pyramidal	unknown	6	4	positive	pyramidal	pyramidal	7.47026	238.398	238.515
3207	j140509a	1	1	2/3	positive	pyramidal	pyramidal	7	4	positive	pyramidal	unknown	11.1276	145.564	145.988
3269	j140207b	1	1	2/3	positive	pyramidal	pyramidal	2	4	positive	pyramidal	pyramidal	71.0814	221.997	233.099
3269	j140207b	1	1	2/3	positive	pyramidal	pyramidal	7	4	positive	pyramidal	pyramidal	123.219	213.533	246.534
3269	j140207b	1	8	2/3	positive	pyramidal	pyramidal	2	4	positive	pyramidal	pyramidal	89.8342	266.859	281.574
3269	j140207b	1	8	2/3	positive	pyramidal	pyramidal	7	4	positive	pyramidal	pyramidal	37.746	258.394	261.136
3270	j140208a	1	1	2/3	positive	pyramidal	unknown	7	4	positive	pyramidal	unknown	19.05	244.136	244.878
3270	j140208a	1	2	2/3	positive	pyramidal	pyramidal	7	4	positive	pyramidal	unknown	26.2536	90.7818	94.5017
3270	j140208b	1	1	2/3	positive	pyramidal	pyramidal	3A	4	positive	pyramidal	pyramidal	88.7234	168.635	190.551
3270	j140208b	1	1	2/3	positive	pyramidal	pyramidal	6	4	positive	pyramidal	pyramidal	139.386	165.007	216
3270	j140208b	1	7	2/3	positive	pyramidal	pyramidal	3A	4	positive	pyramidal	pyramidal	17.0935	114.077	115.35
3270	j140208b	1	7	2/3	positive	pyramidal	pyramidal	6	4	positive	pyramidal	pyramidal	33.7282	110.449	115.484
3270	j140208c	1	1	2/3	positive	pyramidal	pyramidal	3	4	positive	pyramidal	pyramidal	6.28756	230.403	230.489
3270	j140208c	1	2	2/3	positive	pyramidal	unknown	3	4	positive	pyramidal	pyramidal	28.5111	90.8778	95.2453
3270	j140208c	1	8	2/3	positive	pyramidal	unknown	3	4	positive	pyramidal	pyramidal	60.9832	290.332	296.667
3305	j140523a	1	1	2/3	positive	pyramidal	unknown	2B	4	positive	pyramidal	unknown	28.9326	347.605	348.807
3305	j140523a	1	1	2/3	positive	pyramidal	unknown	3	4	positive	pyramidal	unknown	18.7246	356.903	357.394
3305	j140523a	1	1	2/3	positive	pyramidal	unknown	6	4	positive	pyramidal	unknown	40.0908	275.235	278.139
3788	j140624a	1	1	2/3	positive	pyramidal	pyramidal	6	4	positive	pyramidal	unknown	85.0451	240.035	254.656
3788	j140624b	1	1	2/3	positive	pyramidal	pyramidal	2	4	positive	pyramidal	unknown	41.6237	201.309	205.568
3788	j140624b	1	7	2/3	positive	pyramidal	pyramidal	2	4	positive	pyramidal	unknown	126.452	86.5462	153.233
3788	j140624c	1	1	2/3	positive	pyramidal	unknown	2	4	positive	pyramidal	unknown	41.8481	208.935	213.085
3788	j140624c	1	1	2/3	positive	pyramidal	unknown	3	4	positive	pyramidal	unknown	40.7408	266.432	269.529
3788	j140624c	1	1	2/3	positive	pyramidal	unknown	6A	4	positive	pyramidal	unknown	78.1735	286.952	297.41
3791	j140630a	1	1	2/3	positive	pyramidal	pyramidal	2	4	positive	pyramidal	unknown	16.8482	291.97	292.455
3791	j140630a	1	1	2/3	positive	pyramidal	pyramidal	6	4	positive	unknown	pyramidal	12.8746	349.23	349.467
3791	j140630a	1	1	2/3	positive	pyramidal	pyramidal	7	4	positive	pyramidal	unknown	79.122	222.422	236.076
3791	j140630c	1	1	2/3	positive	pyramidal	pyramidal	2	4	positive	pyramidal	pyramidal	18.9238	140.676	141.943
3791	j140630c	1	1	2/3	positive	pyramidal	pyramidal	7	4	positive	unknown	pyramidal	28.4491	190.802	192.911
3793	j140625a	1	1	2/3	positive	pyramidal	pyramidal	2	4	positive	pyramidal	unknown	46.495	284.105	287.885
3793	j140625a	1	1	2/3	positive	pyramidal	pyramidal	3	4	positive	unknown	pyramidal	23.6845	305.878	306.794
3793	j140625a	1	7	2/3	positive	pyramidal	pyramidal	3	4	positive	unknown	pyramidal	38.7071	210.92	214.442
3793	j140625b	1	1	2/3	positive	pyramidal	pyramidal	6A	4	positive	unknown	pyramidal	22.9375	272.865	273.827
3793	j140625b	1	1	2/3	positive	pyramidal	pyramidal	7	4	positive	pyramidal	unknown	77.6779	216.704	230.205
3793	j140625b	1	1	2/3	positive	pyramidal	pyramidal	8	4	positive	pyramidal	unknown	10.6085	241.765	241.998
3793	j140625b	1	2	2/3	positive	pyramidal	pyramidal	6A	4	positive	unknown	pyramidal	23.5366	250.574	251.677
3793	j140625b	1	2	2/3	positive	pyramidal	pyramidal	7	4	positive	pyramidal	unknown	78.7364	194.413	209.752
3793	j140625b	1	2	2/3	positive	pyramidal	pyramidal	8	4	positive	pyramidal	unknown	8.34962	219.475	219.633
3794	j140627a	1	8	2/3	positive	pyramidal	pyramidal	2	4	positive	pyramidal	unknown	1.52952	70.9221	70.9386
3794	j140627a	1	8	2/3	positive	pyramidal	pyramidal	7	4	positive	pyramidal	unknown	6.7752	115.01	115.209
3798	j140626a	1	1	2/3	positive	pyramidal	pyramidal	3	4	positive	pyramidal	unknown	76.4793	262.579	273.49
3798	j140626b	1	1	2/3	positive	unknown	pyramidal	6	4	positive	pyramidal	unknown	8.01322	126.288	126.542
3798	j140626b	1	1	2/3	positive	unknown	pyramidal	7	4	positive	pyramidal	unknown	60.7112	125.596	139.5
4010	j140803a	1	1	2/3	positive	pyramidal	pyramidal	2	4	positive	pyramidal	pyramidal	19.9785	145.353	146.72
4971	j141219a	1	2	2/3	positive	pyramidal	unknown	6	4	positive	pyramidal	unknown	12.7408	331.936	332.18
4971	j141219a	1	2	2/3	positive	pyramidal	unknown	7	4	positive	pyramidal	unknown	66.5397	256.043	264.548
4971	j141219b	1	1B	2/3	positive	pyramidal	pyramidal	2	4	positive	pyramidal	pyramidal	13.4887	72.298	73.5456
4971	j141219b	1	1B	2/3	positive	pyramidal	pyramidal	3	4	positive	pyramidal	pyramidal	8.04835	125.6	125.858
4971	j141219b	1	8	2/3	positive	pyramidal	unknown	2	4	positive	pyramidal	pyramidal	10.1967	109.123	109.598
4971	j141219b	1	8	2/3	positive	pyramidal	unknown	3	4	positive	pyramidal	pyramidal	13.3447	162.425	162.973
5308	j150125a	1	1	2/3	positive	pyramidal	pyramidal	2	4	positive	pyramidal	unknown	20.9723	93.9185	96.2316
5308	j150125a	1	1	2/3	positive	pyramidal	pyramidal	6A	4	positive	pyramidal	unknown	44.6002	79.0364	90.752
5818	j150409c	1	1	2/3	positive	pyramidal	pyramidal	3	4	positive	pyramidal	unknown	74.3436	171.19	186.636
5818	j150409c	1	2	2/3	positive	pyramidal	pyramidal	3	4	positive	pyramidal	unknown	50.2836	28.7424	57.9186
6558	j150731a	1	2	2/3	positive	pyramidal	pyramidal	3	4	positive	pyramidal	stellate	69.4867	157.666	172.299
6558	j150731a	1	2	2/3	positive	pyramidal	pyramidal	6	4	positive	pyramidal	stellate	22.6293	165.791	167.328
6558	j150731b	1	2	2/3	positive	pyramidal	pyramidal	3	4	positive	pyramidal	stellate	22.5293	347.334	348.064
6558	j150731b	1	2	2/3	positive	pyramidal	pyramidal	6	4	positive	pyramidal	stellate	60.8156	312.175	318.043
6558	j150731b	1	8	2/3	positive	pyramidal	pyramidal	3	4	positive	pyramidal	stellate	110.498	373.884	389.87
6558	j150731b	1	8	2/3	positive	pyramidal	pyramidal	6	4	positive	pyramidal	stellate	39.5762	338.725	341.029
6558	j150731c	1	8	2/3	positive	pyramidal	pyramidal	2	4	positive	pyramidal	stellate	153.739	108.848	188.371
6558	j150731c	1	8	2/3	positive	pyramidal	pyramidal	3	4	positive	pyramidal	stellate	178.119	132.005	221.701
6558	j150731c	1	8	2/3	positive	pyramidal	pyramidal	4	4	positive	pyramidal	stellate	147.663	152.637	212.373
7287	j151027a	1	1	2/3	positive	pyramidal	pyramidal	5	4	positive	pyramidal	unknown	49.0737	189.412	195.666
7287	j151027a	1	1	2/3	positive	pyramidal	pyramidal	6	4	positive	pyramidal	pyramidal	80.72	184.738	201.603
7287	j151027a	1	1	2/3	positive	pyramidal	pyramidal	7	4	positive	pyramidal	pyramidal	119.363	128.05	175.056
7287	j151027a	1	2	2/3	positive	pyramidal	pyramidal	5	4	positive	pyramidal	unknown	119.549	49.2003	129.277
7287	j151027a	1	2	2/3	positive	pyramidal	pyramidal	6	4	positive	pyramidal	pyramidal	150.802	44.527	157.239
7287	j151027a	1	2	2/3	positive	pyramidal	pyramidal	7	4	positive	pyramidal	pyramidal	189.668	12.161	190.057
7288	j151026a	1	1	2/3	positive	pyramidal	pyramidal	2	4	positive	pyramidal	pyramidal	15.2008	106.524	107.603
7288	j151026a	1	1	2/3	positive	pyramidal	pyramidal	4	4	positive	pyramidal	pyramidal	20.6478	153.992	155.37
7288	j151026a	1	1	2/3	positive	pyramidal	pyramidal	5	4	positive	pyramidal	pyramidal	150.797	101.185	181.599
7288	j151026a	1	1	2/3	positive	pyramidal	pyramidal	6	4	positive	pyramidal	pyramidal	100.59	103.082	144.029
7288	j151026a	1	1	2/3	positive	pyramidal	pyramidal	7	4	positive	pyramidal	pyramidal	118.963	72.7186	139.428
7288	j151026a	1	8	2/3	positive	pyramidal	pyramidal	2	4	positive	pyramidal	pyramidal	27.2037	80.0274	84.5247
7288	j151026a	1	8	2/3	positive	pyramidal	pyramidal	5	4	positive	pyramidal	pyramidal	110.416	74.6883	133.305
7288	j151026a	1	8	2/3	positive	pyramidal	pyramidal	6	4	positive	pyramidal	pyramidal	60.3627	76.5851	97.5138
7288	j151026a	1	8	2/3	positive	pyramidal	pyramidal	7	4	positive	pyramidal	pyramidal	78.5145	46.2218	91.1097
9972	j160512a	1	2	2/3	positive	pyramidal	pyramidal	5	4	positive	pyramidal	pyramidal	43.0785	94.5107	103.865
9972	j160512a	1	7	2/3	positive	pyramidal	unknown	5	4	positive	pyramidal	pyramidal	37.3074	183.318	187.075
9972	j160512a	1	8	2/3	positive	pyramidal	unknown	5	4	positive	pyramidal	pyramidal	54.6598	200.533	207.849
9972	j160512b	1	2	2/3	positive	pyramidal	unknown	5	4	positive	pyramidal	pyramidal	36.4571	160.929	165.007
9972	j160512b	1	3	2/3	positive	pyramidal	pyramidal	5	4	positive	pyramidal	pyramidal	8.52107	100.386	100.747
10390	j160620a	1	1	2/3	positive	pyramidal	unknown	6	4	positive	pyramidal	unknown	50.6345	116.939	127.43
10390	j160620a	1	2	2/3	positive	pyramidal	unknown	6	4	positive	pyramidal	unknown	53.8556	60.3882	80.9145
10390	j160620a	1	3	2/3	positive	pyramidal	unknown	6	4	positive	pyramidal	unknown	65.1709	4.31055	65.3133
10390	j160620b	1	8	2/3	positive	pyramidal	pyramidal	5	4	positive	pyramidal	pyramidal	4.91623	83.3608	83.5056
10390	j160620b	1	8	2/3	positive	pyramidal	pyramidal	6	4	positive	pyramidal	pyramidal	11.6452	48.4742	49.8533
11508	j160929a	1	7	2/3	positive	pyramidal	pyramidal	3	4	positive	pyramidal	unknown	5.52343	139.504	139.613
12981	j161122a	1	2	2/3	positive	pyramidal	unknown	4	4	positive	pyramidal	stellate	72.168	125.109	144.432
12981	j161122a	1	2	2/3	positive	pyramidal	unknown	6	4	positive	pyramidal	unknown	59.6619	147.733	159.326
12983	j161123a	1	3	2/3	positive	pyramidal	unknown	4	4	positive	pyramidal	unknown	16.3492	51.7003	54.2238
12983	j161123a	1	3	2/3	positive	pyramidal	unknown	5	4	positive	pyramidal	unknown	85.7679	17.865	87.6087
3200	j140508a	1	1	2/3	positive	pyramidal	pyramidal	6	4	negative	pyramidal	unknown	34.1289	186.4	189.499
3200	j140508a	1	2	2/3	positive	pyramidal	pyramidal	6	4	negative	pyramidal	unknown	72.6982	129.067	148.133
3200	j140508a	1	8	2/3	negative	pyramidal	pyramidal	3	4	positive	pyramidal	unknown	79.4962	156.963	175.946
3200	j140508a	1	8	2/3	negative	pyramidal	pyramidal	7	4	positive	pyramidal	unknown	23.9719	69.1747	73.2106
3200	j140508b	1	1	2/3	negative	pyramidal	unknown	6	4	positive	pyramidal	pyramidal	43.9937	275.473	278.964
3200	j140508b	1	2	2/3	positive	pyramidal	pyramidal	3	4	negative	pyramidal	pyramidal	31.3843	202.667	205.082
3200	j140508b	1	7	2/3	negative	pyramidal	unknown	6	4	positive	pyramidal	pyramidal	12.3878	192.039	192.438
3200	j140508b	1	8	2/3	positive	pyramidal	unknown	3	4	negative	pyramidal	pyramidal	17.0585	240.101	240.707
3207	j140509a	1	1	2/3	positive	pyramidal	pyramidal	2	4	negative	pyramidal	pyramidal	89.592	205.26	223.961
3207	j140509a	1	8B	2/3	negative	pyramidal	unknown	7	4	positive	pyramidal	unknown	42.3253	96.1111	105.018
3270	j140208a	1	1	2/3	positive	pyramidal	unknown	3	4	negative	pyramidal	pyramidal	5.13015	274.991	275.039
3270	j140208a	1	2	2/3	positive	pyramidal	pyramidal	3	4	negative	pyramidal	pyramidal	2.35788	121.637	121.66
3270	j140208a	1	8	2/3	negative	pyramidal	unknown	7	4	positive	pyramidal	unknown	66.6822	169.983	182.594
3270	j140208b	1	1	2/3	positive	pyramidal	pyramidal	3B	4	negative	pyramidal	unknown	90.4816	200.489	219.961
3270	j140208b	1	2	2/3	negative	pyramidal	pyramidal	3A	4	positive	pyramidal	pyramidal	62.9257	115.869	131.853
3270	j140208b	1	2	2/3	negative	pyramidal	pyramidal	6	4	positive	pyramidal	pyramidal	113.574	112.242	159.679
3270	j140208b	1	7	2/3	positive	pyramidal	pyramidal	3B	4	negative	pyramidal	unknown	15.1835	145.931	146.719
3270	j140208b	1	8	2/3	negative	pyramidal	pyramidal	3A	4	positive	pyramidal	pyramidal	3.7162	149.049	149.095
3270	j140208b	1	8	2/3	negative	pyramidal	pyramidal	6	4	positive	pyramidal	pyramidal	48.5403	145.421	153.309
3270	j140208c	1	1	2/3	positive	pyramidal	pyramidal	6B	4	negative	pyramidal	pyramidal	68.5175	171.829	184.986
3270	j140208c	1	2	2/3	positive	pyramidal	unknown	6B	4	negative	pyramidal	pyramidal	90.9674	32.3037	96.5329
3270	j140208c	1	7	2/3	negative	pyramidal	unknown	3	4	positive	pyramidal	pyramidal	6.26477	121.81	121.971
3270	j140208c	1	8	2/3	positive	pyramidal	unknown	6B	4	negative	pyramidal	pyramidal	20.532	231.758	232.665
3305	j140523a	1	1	2/3	positive	pyramidal	unknown	2A	4	negative	pyramidal	unknown	20.8448	291.684	292.428
3305	j140523a	1	7	2/3	negative	pyramidal	pyramidal	2B	4	positive	pyramidal	unknown	113.743	226.088	253.088
3305	j140523a	1	7	2/3	negative	pyramidal	pyramidal	3	4	positive	pyramidal	unknown	75.0016	235.386	247.046
3305	j140523a	1	7	2/3	negative	pyramidal	pyramidal	6	4	positive	pyramidal	unknown	59.4917	153.718	164.828
3305	j140523a	1	8	2/3	negative	pyramidal	unknown	2B	4	positive	pyramidal	unknown	105.063	313.603	330.734
3305	j140523a	1	8	2/3	negative	pyramidal	unknown	3	4	positive	pyramidal	unknown	66.3128	322.901	329.639
3305	j140523a	1	8	2/3	negative	pyramidal	unknown	6	4	positive	pyramidal	unknown	51.0288	241.233	246.571
3784	j140623b	1	1	2/3	negative	pyramidal	unknown	7	4	positive	pyramidal	pyramidal	29.7168	174.289	176.804
3788	j140624a	1	7	2/3	negative	pyramidal	pyramidal	6	4	positive	pyramidal	unknown	174.365	281.397	331.04
3788	j140624b	1	1	2/3	positive	pyramidal	pyramidal	3	4	negative	pyramidal	pyramidal	32.2383	244.435	246.551
3788	j140624b	1	1	2/3	positive	pyramidal	pyramidal	6	4	negative	pyramidal	pyramidal	100.888	268.607	286.929
3788	j140624b	1	7	2/3	positive	pyramidal	pyramidal	3	4	negative	pyramidal	pyramidal	137.627	129.671	189.092
3788	j140624b	1	7	2/3	positive	pyramidal	pyramidal	6	4	negative	pyramidal	pyramidal	67.8885	153.844	168.157
3788	j140624b	1	8	2/3	negative	pyramidal	pyramidal	2	4	positive	pyramidal	unknown	26.8566	165.041	167.212
3788	j140624c	1	7	2/3	negative	pyramidal	unknown	2	4	positive	pyramidal	unknown	8.4287	121.202	121.495
3788	j140624c	1	7	2/3	negative	pyramidal	unknown	3	4	positive	pyramidal	unknown	12.0833	178.699	179.107
3791	j140630a	1	8	2/3	negative	pyramidal	pyramidal	2	4	positive	pyramidal	unknown	38.4654	248.918	251.872
3791	j140630a	1	8	2/3	negative	pyramidal	pyramidal	6	4	positive	unknown	pyramidal	33.8249	306.178	308.04
3791	j140630a	1	8	2/3	negative	pyramidal	pyramidal	7	4	positive	pyramidal	unknown	55.1215	179.37	187.648
3791	j140630b	1	8	2/3	negative	unknown	pyramidal	2	4	positive	pyramidal	unknown	48.9848	283.529	287.729
3791	j140630b	1	8	2/3	negative	unknown	pyramidal	6	4	positive	unknown	pyramidal	76.4281	348.364	356.65
3791	j140630b	1	8	2/3	negative	unknown	pyramidal	7	4	positive	unknown	pyramidal	46.8982	287.592	291.391
3791	j140630c	1	1	2/3	positive	pyramidal	pyramidal	3	4	negative	pyramidal	unknown	94.0363	177.856	201.185
3791	j140630c	1	1	2/3	positive	pyramidal	pyramidal	6	4	negative	pyramidal	unknown	73.5837	196.729	210.04
3791	j140630c	1	8	2/3	negative	pyramidal	pyramidal	2	4	positive	pyramidal	pyramidal	44.3988	191.811	196.883
3791	j140630c	1	8	2/3	negative	pyramidal	pyramidal	7	4	positive	unknown	pyramidal	31.7282	241.937	244.009
3793	j140625a	1	1	2/3	positive	pyramidal	pyramidal	6	4	negative	pyramidal	unknown	66.588	295.872	303.273
3793	j140625a	1	7	2/3	positive	pyramidal	pyramidal	6	4	negative	pyramidal	unknown	8.10212	200.914	201.077
3793	j140625a	1	8	2/3	negative	pyramidal	pyramidal	3	4	positive	unknown	pyramidal	34.4931	283.604	285.694
3793	j140625b	1	1	2/3	positive	pyramidal	pyramidal	6B	4	negative	pyramidal	unknown	13.5571	261.784	262.135
3793	j140625b	1	2	2/3	positive	pyramidal	pyramidal	6B	4	negative	pyramidal	unknown	10.2963	239.493	239.714
3793	j140625b	1	3	2/3	negative	pyramidal	pyramidal	6A	4	positive	unknown	pyramidal	4.33506	216.821	216.865
3793	j140625b	1	3	2/3	negative	pyramidal	pyramidal	7	4	positive	pyramidal	unknown	58.3808	160.66	170.939
3793	j140625b	1	3	2/3	negative	pyramidal	pyramidal	8	4	positive	pyramidal	unknown	28.732	185.722	187.931
3794	j140627a	1	1	2/3	negative	pyramidal	unknown	2	4	positive	pyramidal	unknown	100.022	62.0274	117.694
3794	j140627a	1	1	2/3	negative	pyramidal	unknown	7	4	positive	pyramidal	unknown	99.0192	106.115	145.139
3794	j140627a	1	8	2/3	positive	pyramidal	pyramidal	3	4	negative	pyramidal	unknown	13.8872	79.6311	80.8329
3794	j140627b	1	1	2/3	positive	pyramidal	pyramidal	2	4	negative	pyramidal	unknown	14.4028	85.5528	86.7567
3794	j140627b	1	1	2/3	positive	pyramidal	pyramidal	3	4	negative	pyramidal	pyramidal	25.515	108.008	110.981
3794	j140627b	1	1	2/3	positive	pyramidal	pyramidal	6	4	negative	pyramidal	unknown	9.45284	119.837	120.21
3795	j140629a	1	8	2/3	negative	pyramidal	pyramidal	2	4	positive	pyramidal	unknown	28.6206	186.951	189.129
3795	j140629a	1	8	2/3	negative	pyramidal	pyramidal	7	4	positive	pyramidal	unknown	53.5865	209.752	216.488
3798	j140626a	1	1	2/3	positive	pyramidal	pyramidal	4	4	negative	pyramidal	unknown	63.0205	321.735	327.849
3798	j140626a	1	2	2/3	negative	pyramidal	unknown	3	4	positive	pyramidal	unknown	69.2161	233.754	243.786
3798	j140626a	1	8	2/3	negative	pyramidal	unknown	3	4	positive	pyramidal	unknown	111.588	231.106	256.635
3798	j140626b	1	1	2/3	positive	unknown	pyramidal	3	4	negative	pyramidal	unknown	44.1722	116.183	124.297
3798	j140626b	1	2	2/3	negative	pyramidal	unknown	6	4	positive	pyramidal	unknown	40.755	115.026	122.033
3798	j140626b	1	2	2/3	negative	pyramidal	unknown	7	4	positive	pyramidal	unknown	13.3943	114.334	115.116
3798	j140626b	1	8	2/3	negative	unknown	pyramidal	6	4	positive	pyramidal	unknown	71.2009	99.5555	122.396
3798	j140626b	1	8	2/3	negative	unknown	pyramidal	7	4	positive	pyramidal	unknown	18.6244	98.8636	100.603
4009	j140801b	1	1	2/3	positive	pyramidal	unknown	3	4	negative	pyramidal	unknown
4009	j140801b	1	1	2/3	positive	pyramidal	unknown	6	4	negative	pyramidal	unknown
4010	j140803a	1	1	2/3	positive	pyramidal	pyramidal	7	4	negative	pyramidal	unknown	54.4882	114.303	126.626
4010	j140803a	1	8	2/3	negative	pyramidal	pyramidal	2	4	positive	pyramidal	pyramidal	13.9003	130.672	131.409
4965	j141216b	1	1	2/3	negative	pyramidal	unknown	2	4	positive	pyramidal	unknown	34.9255	58.2659	67.9316
4965	j141216b	1	1	2/3	negative	pyramidal	unknown	7	4	positive	pyramidal	pyramidal	16.9453	80.2918	82.0604
4971	j141219a	1	1	2/3	negative	pyramidal	unknown	6	4	positive	pyramidal	unknown	8.36201	342.308	342.411
4971	j141219a	1	1	2/3	negative	pyramidal	unknown	7	4	positive	pyramidal	unknown	63.2404	266.416	273.819
4971	j141219a	1	2	2/3	positive	pyramidal	unknown	3	4	negative	pyramidal	pyramidal	87.0977	322.907	334.447
4971	j141219a	1	8	2/3	negative	pyramidal	unknown	6	4	positive	pyramidal	unknown	34.2008	345.72	347.408
4971	j141219a	1	8	2/3	negative	pyramidal	unknown	7	4	positive	pyramidal	unknown	34.4468	269.828	272.018
4971	j141219b	1	1B	2/3	positive	pyramidal	pyramidal	6B	4	negative	pyramidal	pyramidal	53.7317	142.196	152.01
4971	j141219b	1	7A	2/3	negative	pyramidal	unknown	2	4	positive	pyramidal	pyramidal	32.939	142.617	146.372
4971	j141219b	1	7A	2/3	negative	pyramidal	unknown	3	4	positive	pyramidal	pyramidal	38.61	195.919	199.688
4971	j141219b	1	8	2/3	positive	pyramidal	unknown	6B	4	negative	pyramidal	pyramidal	35.9482	179.021	182.595
5191	j150114a	1	1	2/3	positive	pyramidal	pyramidal	3	4	negative	pyramidal	unknown	44.4653	230.564	234.813
5191	j150114b	1	1	2/3	positive	pyramidal	unknown	3	4	negative	pyramidal	unknown
5191	j150114b	1	2	2/3	positive	pyramidal	pyramidal	3	4	negative	pyramidal	unknown
5308	j150125a	1	1	2/3	positive	pyramidal	pyramidal	3	4	negative	pyramidal	unknown	14.2144	99.0517	100.066
5308	j150125a	1	1	2/3	positive	pyramidal	pyramidal	7	4	negative	pyramidal	stellate	33.136	71.9277	79.1934
5308	j150125a	1	8	2/3	negative	pyramidal	unknown	2	4	positive	pyramidal	unknown	135.701	145.839	199.208
5541	j150224a	1	1	2/3	positive	pyramidal	pyramidal	3	4	negative	pyramidal	stellate	38.0024	172.209	176.352
6558	j150731a	1	1	2/3	negative	pyramidal	pyramidal	3	4	positive	pyramidal	stellate	48.7752	191.712	197.82
6558	j150731a	1	1	2/3	negative	pyramidal	pyramidal	6	4	positive	pyramidal	stellate	43.1409	199.837	204.441
6558	j150731a	1	2	2/3	positive	pyramidal	pyramidal	4	4	negative	pyramidal	stellate	89.704	223.074	240.434
6558	j150731a	1	7	2/3	negative	pyramidal	pyramidal	3	4	positive	pyramidal	stellate	169.791	170.572	240.674
6558	j150731a	1	7	2/3	negative	pyramidal	pyramidal	6	4	positive	pyramidal	stellate	78.2899	178.697	195.095
6558	j150731b	1	1	2/3	negative	pyramidal	pyramidal	3	4	positive	pyramidal	stellate	70.5648	417.315	423.239
6558	j150731b	1	1	2/3	negative	pyramidal	pyramidal	6	4	positive	pyramidal	stellate	10.6297	382.156	382.304
6558	j150731b	1	2	2/3	positive	pyramidal	pyramidal	4	4	negative	pyramidal	unknown	23.0848	311.105	311.96
6558	j150731b	1	7	2/3	negative	pyramidal	pyramidal	3	4	positive	pyramidal	stellate	110.91	221.679	247.876
6558	j150731b	1	7	2/3	negative	pyramidal	pyramidal	6	4	positive	pyramidal	stellate	39.9376	186.52	190.748
6558	j150731b	1	8	2/3	positive	pyramidal	pyramidal	4	4	negative	pyramidal	unknown	75.0631	337.654	345.897
7023	j150929a	1	1	2/3	positive	pyramidal	pyramidal	3	4	negative	pyramidal	unknown	30.1148	124.302	127.898
7023	j150929a	1	2	2/3	positive	pyramidal	pyramidal	3	4	negative	pyramidal	unknown	63.9771	63.319	90.0132
7287	j151027a	1	1	2/3	positive	pyramidal	pyramidal	3	4	negative	pyramidal	unknown	2.64752	176.205	176.225
7287	j151027a	1	2	2/3	positive	pyramidal	pyramidal	3	4	negative	pyramidal	unknown	68.4375	35.9942	77.3258
7287	j151027a	1	8	2/3	negative	pyramidal	pyramidal	5	4	positive	pyramidal	unknown	59.1621	104.132	119.765
7287	j151027a	1	8	2/3	negative	pyramidal	pyramidal	6	4	positive	pyramidal	pyramidal	90.3996	99.4591	134.403
7287	j151027a	1	8	2/3	negative	pyramidal	pyramidal	7	4	positive	pyramidal	pyramidal	129.238	42.7711	136.132
7288	j151026a	1	1	2/3	positive	pyramidal	pyramidal	3	4	negative	pyramidal	pyramidal	31.8242	126	129.957
7288	j151026a	1	8	2/3	positive	pyramidal	pyramidal	3	4	negative	pyramidal	pyramidal	11.4105	99.5035	100.156
9972	j160512a	1	2	2/3	positive	pyramidal	pyramidal	4	4	negative	pyramidal	unknown	19.6723	112.419	114.127
9972	j160512a	1	3	2/3	negative	pyramidal	pyramidal	5	4	positive	pyramidal	pyramidal	4.75022	136.518	136.6
9972	j160512a	1	6	2/3	negative	pyramidal	pyramidal	5	4	positive	pyramidal	pyramidal	40.4794	105.821	113.299
9972	j160512a	1	7	2/3	positive	pyramidal	unknown	4	4	negative	pyramidal	unknown	79.4231	201.226	216.333
9972	j160512a	1	8	2/3	positive	pyramidal	unknown	4	4	negative	pyramidal	unknown	96.8312	218.442	238.941
9972	j160512b	1	2	2/3	positive	pyramidal	unknown	4	4	negative	pyramidal	pyramidal	61.384	172.168	182.783
9972	j160512b	1	3	2/3	positive	pyramidal	pyramidal	4	4	negative	pyramidal	pyramidal	31.0877	111.625	115.873
9972	j160512b	1	6	2/3	negative	pyramidal	pyramidal	5	4	positive	pyramidal	pyramidal	25.2579	94.9212	98.2242
9972	j160512b	1	7	2/3	negative	pyramidal	unknown	5	4	positive	pyramidal	pyramidal	44.5681	143.478	150.241
10390	j160620a	1	1	2/3	positive	pyramidal	unknown	5	4	negative	pyramidal	pyramidal	63.248	159.034	171.149
10390	j160620a	1	2	2/3	positive	pyramidal	unknown	5	4	negative	pyramidal	pyramidal	67.2004	102.483	122.551
10390	j160620a	1	3	2/3	positive	pyramidal	unknown	5	4	negative	pyramidal	pyramidal	78.4013	37.7845	87.0312
10390	j160620a	1	7	2/3	negative	pyramidal	unknown	6	4	positive	pyramidal	unknown	13.8075	49.0616	50.9675
10390	j160620a	1	8	2/3	negative	pyramidal	unknown	6	4	positive	pyramidal	unknown	30.0577	130.735	134.146
10390	j160620b	1	2	2/3	negative	pyramidal	unknown	5	4	positive	pyramidal	pyramidal	77.7318	93.5255	121.611
10390	j160620b	1	2	2/3	negative	pyramidal	unknown	6	4	positive	pyramidal	pyramidal	82.9779	58.6389	101.606
10390	j160620b	1	8	2/3	positive	pyramidal	pyramidal	4	4	negative	pyramidal	unknown	73.7673	57.5331	93.5504
11508	j160929a	1	7	2/3	positive	pyramidal	pyramidal	6	4	negative	pyramidal	stellate	34.3281	102.456	108.054
11509	j160929c	1	2	2/3	positive	pyramidal	pyramidal	6	4	negative	pyramidal	stellate	9.26754	98.1093	98.546
12981	j161122a	1	2	2/3	positive	pyramidal	unknown	5	4	negative	pyramidal	stellate	28.0378	143.848	146.555
12981	j161122a	1	7	2/3	negative	pyramidal	unknown	4	4	positive	pyramidal	stellate	89.446	102.207	135.819
12981	j161122a	1	7	2/3	negative	pyramidal	unknown	6	4	positive	pyramidal	unknown	16.1811	124.831	125.875
12983	j161123a	1	2	2/3	negative	pyramidal	pyramidal	4	4	positive	pyramidal	unknown	10.0564	127.958	128.353
12983	j161123a	1	2	2/3	negative	pyramidal	pyramidal	5	4	positive	pyramidal	unknown	60.4742	94.1228	111.876
12983	j161123a	1	6	2/3	negative	pyramidal	unknown	4	4	positive	pyramidal	unknown	57.2209	65.8063	87.205
12983	j161123a	1	6	2/3	negative	pyramidal	unknown	5	4	positive	pyramidal	unknown	13.1926	31.971	34.5859
3200	j140508a	1	1	2/3	positive	pyramidal	pyramidal	4	5	positive	pyramidal	unknown	3.96274	374.728	374.749
3200	j140508b	1	2	2/3	positive	pyramidal	pyramidal	4	5	positive	pyramidal	pyramidal	11.1168	358.743	358.915
3200	j140508b	1	8	2/3	positive	pyramidal	unknown	4	5	positive	pyramidal	pyramidal	35.8243	396.178	397.794
3207	j140509a	1	1	2/3	positive	pyramidal	pyramidal	3	5	positive	pyramidal	pyramidal	203.061	600.863	634.248
3207	j140509a	1	1	2/3	positive	pyramidal	pyramidal	6	5	positive	pyramidal	unknown	84.3097	477.466	484.853
3207	j140509c	1	1	2/3	positive	pyramidal	unknown	3	5	positive	pyramidal	pyramidal	15.0218	338.353	338.686
3207	j140509c	1	1	2/3	positive	pyramidal	unknown	5	5	positive	unknown	pyramidal	39.9487	498.507	500.105
3207	j140509c	1	1	2/3	positive	pyramidal	unknown	6	5	positive	pyramidal	pyramidal	24.4916	360.149	360.981
3207	j140509c	1	2	2/3	positive	pyramidal	unknown	3	5	positive	pyramidal	pyramidal	11.3711	249.684	249.943
3207	j140509c	1	2	2/3	positive	pyramidal	unknown	5	5	positive	unknown	pyramidal	43.1282	409.838	412.101
3207	j140509c	1	2	2/3	positive	pyramidal	unknown	6	5	positive	pyramidal	pyramidal	27.5681	271.48	272.877
3269	j140207a	1	1	2/3	positive	pyramidal	pyramidal	5	5	positive	unknown	pyramidal	153.897	399.992	428.577
3269	j140207b	1	1	2/3	positive	pyramidal	pyramidal	3	5	positive	pyramidal	pyramidal	2.33601	324.025	324.034
3269	j140207b	1	1	2/3	positive	pyramidal	pyramidal	5	5	positive	unknown	pyramidal	100.235	362.539	376.14
3269	j140207b	1	1	2/3	positive	pyramidal	pyramidal	6	5	positive	pyramidal	unknown	175.518	340.106	382.726
3269	j140207b	1	8	2/3	positive	pyramidal	pyramidal	3	5	positive	pyramidal	pyramidal	161.539	368.886	402.706
3269	j140207b	1	8	2/3	positive	pyramidal	pyramidal	5	5	positive	unknown	pyramidal	60.7078	407.4	411.898
3269	j140207b	1	8	2/3	positive	pyramidal	pyramidal	6	5	positive	pyramidal	unknown	17.3835	384.968	385.36
3269	j140207c	1	1	2/3	positive	pyramidal	pyramidal	2	5	positive	pyramidal	pyramidal	42.182	48.9234	64.5974
3269	j140207c	1	1	2/3	positive	pyramidal	pyramidal	3	5	positive	pyramidal	pyramidal	10.1166	105.265	105.75
3270	j140208a	1	1	2/3	positive	pyramidal	unknown	5	5	positive	pyramidal	pyramidal	19.8537	473.235	473.652
3270	j140208a	1	1	2/3	positive	pyramidal	unknown	6	5	positive	pyramidal	pyramidal	21.4633	354.888	355.536
3270	j140208a	1	2	2/3	positive	pyramidal	pyramidal	5	5	positive	pyramidal	pyramidal	25.0381	319.881	320.859
3270	j140208a	1	2	2/3	positive	pyramidal	pyramidal	6	5	positive	pyramidal	pyramidal	28.615	201.533	203.555
3270	j140208b	1	1	2/3	positive	pyramidal	pyramidal	5	5	positive	pyramidal	pyramidal	145.134	285.663	320.418
3270	j140208b	1	7	2/3	positive	pyramidal	pyramidal	5	5	positive	pyramidal	pyramidal	39.4913	231.105	234.455
3270	j140208c	1	1	2/3	positive	pyramidal	pyramidal	5	5	positive	unknown	pyramidal	119.854	293.533	317.059
3270	j140208c	1	2	2/3	positive	pyramidal	unknown	5	5	positive	unknown	pyramidal	142.368	154.008	209.731
3270	j140208c	1	8	2/3	positive	pyramidal	unknown	5	5	positive	unknown	pyramidal	53.7498	353.462	357.525
3305	j140523a	1	1	2/3	positive	pyramidal	unknown	4	5	positive	pyramidal	unknown	40.1936	695.949	697.109
3784	j140623a	1	1	2/3	positive	pyramidal	pyramidal	7	5	positive	pyramidal	pyramidal	147.961	239.402	281.436
3788	j140624b	1	1	2/3	positive	pyramidal	pyramidal	4	5	positive	pyramidal	pyramidal	24.593	480.538	481.167
3788	j140624b	1	1	2/3	positive	pyramidal	pyramidal	5A	5	positive	pyramidal	pyramidal	58.1032	514.507	517.777
3788	j140624b	1	1	2/3	positive	pyramidal	pyramidal	5B	5	positive	pyramidal	pyramidal	47.4202	584.901	586.82
3788	j140624b	1	7	2/3	positive	pyramidal	pyramidal	4	5	positive	pyramidal	pyramidal	187.351	365.775	410.964
3788	j140624b	1	7	2/3	positive	pyramidal	pyramidal	5A	5	positive	pyramidal	pyramidal	111.893	399.743	415.108
3788	j140624b	1	7	2/3	positive	pyramidal	pyramidal	5B	5	positive	pyramidal	pyramidal	214.994	470.138	516.964
3788	j140624c	1	1	2/3	positive	pyramidal	unknown	4	5	positive	pyramidal	pyramidal	54.4078	450.659	453.931
3788	j140624c	1	1	2/3	positive	pyramidal	unknown	5	5	positive	pyramidal	pyramidal	52.2899	418.802	422.054
3791	j140630a	1	1	2/3	positive	pyramidal	pyramidal	3	5	positive	pyramidal	pyramidal	66.6576	512.895	517.208
3791	j140630a	1	1	2/3	positive	pyramidal	pyramidal	5	5	positive	pyramidal	pyramidal	127.514	464.777	481.952
3791	j140630c	1	1	2/3	positive	pyramidal	pyramidal	4	5	positive	pyramidal	pyramidal	80.5315	496.136	502.629
3793	j140625a	1	1	2/3	positive	pyramidal	pyramidal	4	5	positive	pyramidal	pyramidal	65.451	710.13	713.14
3793	j140625a	1	1	2/3	positive	pyramidal	pyramidal	5	5	positive	unknown	pyramidal	81.6653	573.911	579.692
3793	j140625a	1	7	2/3	positive	pyramidal	pyramidal	4	5	positive	pyramidal	pyramidal	17.8213	615.172	615.43
3793	j140625a	1	7	2/3	positive	pyramidal	pyramidal	5	5	positive	unknown	pyramidal	29.5292	478.953	479.862
3793	j140625b	1	1	2/3	positive	pyramidal	pyramidal	5	5	positive	pyramidal	pyramidal	35.3552	344.024	345.836
3793	j140625b	1	2	2/3	positive	pyramidal	pyramidal	5	5	positive	pyramidal	pyramidal	35.7712	321.733	323.716
3794	j140627a	1	8	2/3	positive	pyramidal	pyramidal	4	5	positive	pyramidal	pyramidal	34.085	337.132	338.85
3798	j140626a	1	1	2/3	positive	pyramidal	pyramidal	7	5	positive	pyramidal	pyramidal	3.72391	328.144	328.165
3798	j140626b	1	1	2/3	positive	unknown	pyramidal	4	5	positive	unknown	pyramidal	9.66367	343.994	344.13
3798	j140626b	1	1	2/3	positive	unknown	pyramidal	5	5	positive	unknown	pyramidal	46.3894	376.819	379.663
4009	j140801b	1	1	2/3	positive	pyramidal	unknown	4	5	positive	pyramidal	unknown
4965	j141216a	1	3B	2/3	positive	pyramidal	unknown	4	5	positive	pyramidal	unknown	31.1371	350.672	352.052
4965	j141216a	1	6	2/3	positive	pyramidal	unknown	4	5	positive	pyramidal	unknown	44.9241	372.256	374.957
4965	j141216a	1	7	2/3	positive	pyramidal	pyramidal	4	5	positive	pyramidal	unknown	52.7536	431.177	434.392
4971	j141219a	1	2	2/3	positive	pyramidal	unknown	5	5	positive	unknown	pyramidal	16.1269	450.102	450.391
4971	j141219b	1	8	2/3	positive	pyramidal	unknown	4	5	positive	pyramidal	pyramidal	8.17262	364.603	364.695
5191	j150114b	1	1	2/3	positive	pyramidal	unknown	4	5	positive	pyramidal	pyramidal
5191	j150114b	1	2	2/3	positive	pyramidal	pyramidal	4	5	positive	pyramidal	pyramidal	81.3632	307.186	317.779
5191	j150114c	1	2	2/3	positive	pyramidal	unknown	3	5	positive	pyramidal	pyramidal
5308	j150125a	1	1	2/3	positive	pyramidal	pyramidal	4	5	positive	pyramidal	pyramidal	23.0888	211.412	212.669
5541	j150224a	1	1	2/3	positive	pyramidal	pyramidal	4	5	positive	pyramidal	pyramidal	19.4784	260.013	260.741
5818	j150409b	1	2	2/3	positive	pyramidal	pyramidal	6	5	positive	pyramidal	pyramidal	88.1569	449.342	457.909
5818	j150409c	1	1	2/3	positive	pyramidal	pyramidal	4	5	positive	pyramidal	unknown	42.2275	242.544	246.193
5818	j150409c	1	2	2/3	positive	pyramidal	pyramidal	4	5	positive	pyramidal	unknown	31.4534	100.097	104.923
8780	j160217a	1	1	2/3	positive	pyramidal	pyramidal	3	5	positive	pyramidal	pyramidal	52.6977	421.487	424.769
8780	j160217a	1	1	2/3	positive	pyramidal	pyramidal	5	5	positive	pyramidal	pyramidal	125.552	304.198	329.089
8780	j160217a	1	2	2/3	positive	pyramidal	pyramidal	3	5	positive	pyramidal	pyramidal	17.0431	393.019	393.388
8780	j160217a	1	2	2/3	positive	pyramidal	pyramidal	5	5	positive	pyramidal	pyramidal	60.1764	275.73	282.22
8780	j160217b	1	1	2/3	positive	pyramidal	pyramidal	4	5	positive	pyramidal	pyramidal	1.1723	260.871	260.873
8780	j160217b	1	1	2/3	positive	pyramidal	pyramidal	6	5	positive	pyramidal	pyramidal	17.2146	268.697	269.248
8780	j160217b	1	8	2/3	positive	pyramidal	pyramidal	4	5	positive	pyramidal	pyramidal	74.6494	252.198	263.014
8780	j160217b	1	8	2/3	positive	pyramidal	pyramidal	6	5	positive	pyramidal	pyramidal	56.495	260.024	266.091
11508	j160929a	1	7	2/3	positive	pyramidal	pyramidal	4	5	positive	pyramidal	pyramidal	15.7218	241.788	242.299
11509	j160929c	1	2	2/3	positive	pyramidal	pyramidal	3	5	positive	pyramidal	pyramidal	47.6088	330.297	333.71
3200	j140508a	1	1	2/3	positive	pyramidal	pyramidal	5A	5	negative	pyramidal	unknown	41.8355	264.043	267.337
3200	j140508a	1	1	2/3	positive	pyramidal	pyramidal	5B	5	negative	unknown	pyramidal	61.6366	285.435	292.015
3200	j140508a	1	2	2/3	positive	pyramidal	pyramidal	5A	5	negative	pyramidal	unknown	80.8624	206.71	221.963
3200	j140508a	1	2	2/3	positive	pyramidal	pyramidal	5B	5	negative	unknown	pyramidal	101.912	228.102	249.833
3200	j140508b	1	1	2/3	negative	pyramidal	unknown	4	5	positive	pyramidal	pyramidal	6.06791	433.253	433.296
3200	j140508b	1	2	2/3	positive	pyramidal	pyramidal	5	5	negative	pyramidal	pyramidal	38.6141	384.277	386.212
3200	j140508b	1	7	2/3	negative	pyramidal	unknown	4	5	positive	pyramidal	pyramidal	29.2288	349.819	351.038
3200	j140508b	1	8	2/3	positive	pyramidal	unknown	5	5	negative	pyramidal	pyramidal	4.38347	421.711	421.734
3207	j140509a	1	1	2/3	positive	pyramidal	pyramidal	4	5	negative	pyramidal	pyramidal	148.501	609.73	627.553
3207	j140509a	1	1	2/3	positive	pyramidal	pyramidal	5B	5	negative	unknown	pyramidal	119.727	482.317	496.955
3207	j140509a	1	8B	2/3	negative	pyramidal	unknown	3	5	positive	pyramidal	pyramidal	174.239	551.41	578.284
3207	j140509a	1	8B	2/3	negative	pyramidal	unknown	6	5	positive	pyramidal	unknown	60.4518	428.014	432.262
3207	j140509c	1	1	2/3	positive	pyramidal	unknown	4A	5	negative	unknown	pyramidal	17.0098	473.322	473.627
3207	j140509c	1	2	2/3	positive	pyramidal	unknown	4B	5	negative	pyramidal	pyramidal	28.299	361.809	362.914
3207	j140509c	1	7	2/3	negative	unknown	pyramidal	3	5	positive	pyramidal	pyramidal	55.4395	187.444	195.471
3207	j140509c	1	7	2/3	negative	unknown	pyramidal	5	5	positive	unknown	pyramidal	4.07946	347.598	347.622
3207	j140509c	1	7	2/3	negative	unknown	pyramidal	6	5	positive	pyramidal	pyramidal	16.8823	209.241	209.921
3269	j140207c	1	1	2/3	positive	pyramidal	pyramidal	4B	5	negative	unknown	pyramidal	11.5105	123.188	123.725
3269	j140207c	1	1	2/3	positive	pyramidal	pyramidal	5	5	negative	unknown	pyramidal	39.9695	124.405	130.668
3269	j140207c	1	1	2/3	positive	pyramidal	pyramidal	6	5	negative	pyramidal	unknown	60.076	53.2502	80.2789
3269	j140207c	1	7B	2/3	negative	pyramidal	unknown	2	5	positive	pyramidal	pyramidal	55.0927	62.6841	83.4536
3269	j140207c	1	7B	2/3	negative	pyramidal	unknown	3	5	positive	pyramidal	pyramidal	107.135	119.026	160.141
3270	j140208a	1	1	2/3	positive	pyramidal	unknown	4	5	negative	pyramidal	pyramidal	75.4322	479.222	485.122
3270	j140208a	1	2	2/3	positive	pyramidal	pyramidal	4	5	negative	pyramidal	pyramidal	69.138	325.867	333.121
3270	j140208a	1	8	2/3	negative	pyramidal	unknown	5	5	positive	pyramidal	pyramidal	81.9019	399.082	407.399
3270	j140208a	1	8	2/3	negative	pyramidal	unknown	6	5	positive	pyramidal	pyramidal	63.9124	280.734	287.918
3270	j140208b	1	1	2/3	positive	pyramidal	pyramidal	4B	5	negative	pyramidal	unknown	76.02	288.078	297.94
3270	j140208b	1	2	2/3	negative	pyramidal	pyramidal	5	5	positive	pyramidal	pyramidal	119.319	232.898	261.684
3270	j140208b	1	7	2/3	positive	pyramidal	pyramidal	4B	5	negative	pyramidal	unknown	29.6481	233.52	235.395
3270	j140208b	1	8	2/3	negative	pyramidal	pyramidal	5	5	positive	pyramidal	pyramidal	54.2547	266.077	271.553
3270	j140208c	1	1	2/3	positive	pyramidal	pyramidal	4	5	negative	pyramidal	pyramidal	112.659	368.226	385.075
3270	j140208c	1	2	2/3	positive	pyramidal	unknown	4	5	negative	pyramidal	pyramidal	135.219	228.701	265.684
3270	j140208c	1	7	2/3	negative	pyramidal	unknown	5	5	positive	unknown	pyramidal	118.919	184.94	219.874
3270	j140208c	1	8	2/3	positive	pyramidal	unknown	4	5	negative	pyramidal	pyramidal	48.7553	428.155	430.922
3305	j140523a	1	1	2/3	positive	pyramidal	unknown	5	5	negative	pyramidal	unknown	33.7567	595.452	596.408
3305	j140523a	1	7	2/3	negative	pyramidal	pyramidal	4	5	positive	pyramidal	unknown	125.476	574.432	587.976
3305	j140523a	1	8	2/3	negative	pyramidal	unknown	4	5	positive	pyramidal	unknown	116.793	661.946	672.171
3784	j140623a	1	1	2/3	positive	pyramidal	pyramidal	3	5	negative	pyramidal	pyramidal	69.954	310.738	318.515
3784	j140623a	1	1	2/3	positive	pyramidal	pyramidal	4	5	negative	pyramidal	pyramidal	141.009	366.539	392.727
3784	j140623a	1	1	2/3	positive	pyramidal	pyramidal	6	5	negative	pyramidal	pyramidal	154.189	304.334	341.165
3784	j140623a	1	8	2/3	negative	pyramidal	pyramidal	7	5	positive	pyramidal	pyramidal	36.0336	237.426	240.145
3784	j140623b	1	1	2/3	negative	pyramidal	unknown	4	5	positive	pyramidal	pyramidal	7.37223	334.7	334.781
3784	j140623c	1	1	2/3	negative	pyramidal	unknown	3	5	positive	pyramidal	pyramidal	40.1431	171.969	176.592
3784	j140623c	1	1	2/3	negative	pyramidal	unknown	5	5	positive	pyramidal	pyramidal	9.08915	271.057	271.209
3784	j140623c	1	8	2/3	negative	unknown	pyramidal	3	5	positive	pyramidal	pyramidal	92.547	184.697	206.586
3784	j140623c	1	8	2/3	negative	unknown	pyramidal	5	5	positive	pyramidal	pyramidal	61.3036	283.784	290.33
3788	j140624a	1	1	2/3	positive	pyramidal	pyramidal	5	5	negative	pyramidal	unknown	174.104	374.581	413.065
3788	j140624b	1	1	2/3	positive	pyramidal	pyramidal	5C	5	negative	pyramidal	unknown	40.5442	633.047	634.344
3788	j140624b	1	7	2/3	positive	pyramidal	pyramidal	5C	5	negative	pyramidal	unknown	133.785	518.283	535.272
3788	j140624b	1	8	2/3	negative	pyramidal	pyramidal	4	5	positive	pyramidal	pyramidal	88.0988	444.27	452.92
3788	j140624b	1	8	2/3	negative	pyramidal	pyramidal	5A	5	positive	pyramidal	pyramidal	15.5237	478.238	478.49
3788	j140624b	1	8	2/3	negative	pyramidal	pyramidal	5B	5	positive	pyramidal	pyramidal	115.385	548.633	560.635
3788	j140624c	1	7	2/3	negative	pyramidal	unknown	4	5	positive	pyramidal	pyramidal	58.8965	362.926	367.674
3788	j140624c	1	7	2/3	negative	pyramidal	unknown	5	5	positive	pyramidal	pyramidal	58.0965	331.07	336.128
3791	j140630a	1	1	2/3	positive	pyramidal	pyramidal	4	5	negative	pyramidal	pyramidal	77.6897	516.169	521.983
3791	j140630a	1	8	2/3	negative	pyramidal	pyramidal	3	5	positive	pyramidal	pyramidal	42.3531	469.843	471.748
3791	j140630a	1	8	2/3	negative	pyramidal	pyramidal	5	5	positive	pyramidal	pyramidal	103.624	421.725	434.27
3791	j140630b	1	8	2/3	negative	unknown	pyramidal	5	5	positive	unknown	pyramidal	111.721	611.104	621.233
3791	j140630c	1	8	2/3	negative	pyramidal	pyramidal	4	5	positive	pyramidal	pyramidal	25.7586	547.271	547.877
3793	j140625a	1	8	2/3	negative	pyramidal	pyramidal	4	5	positive	pyramidal	pyramidal	11.7525	687.856	687.956
3793	j140625a	1	8	2/3	negative	pyramidal	pyramidal	5	5	positive	unknown	pyramidal	25.2383	551.637	552.214
3793	j140625b	1	1	2/3	positive	pyramidal	pyramidal	4	5	negative	pyramidal	pyramidal	37.595	376.735	378.606
3793	j140625b	1	2	2/3	positive	pyramidal	pyramidal	4	5	negative	pyramidal	pyramidal	37.328	354.444	356.404
3793	j140625b	1	3	2/3	negative	pyramidal	pyramidal	5	5	positive	pyramidal	pyramidal	55.8197	287.98	293.34
3793	j140625c	1	8	2/3	negative	pyramidal	pyramidal	5	5	positive	pyramidal	pyramidal	52.9437	464.109	467.119
3794	j140627a	1	1	2/3	negative	pyramidal	unknown	4	5	positive	pyramidal	pyramidal	68.0025	328.237	335.207
3794	j140627a	1	8	2/3	positive	pyramidal	pyramidal	6	5	negative	unknown	pyramidal	35.5864	119.689	124.867
3794	j140627b	1	1	2/3	positive	pyramidal	pyramidal	4	5	negative	pyramidal	unknown	9.56023	233.615	233.81
3795	j140629a	1	8	2/3	negative	pyramidal	pyramidal	4	5	positive	pyramidal	pyramidal	30.7857	470.546	471.552
3795	j140629a	1	8	2/3	negative	pyramidal	pyramidal	5	5	positive	pyramidal	pyramidal	15.5475	475.979	476.233
3798	j140626a	1	1	2/3	positive	pyramidal	pyramidal	5	5	negative	pyramidal	pyramidal	12.227	375.73	375.928
3798	j140626a	1	1	2/3	positive	pyramidal	pyramidal	6	5	negative	pyramidal	pyramidal	15.7331	362.39	362.732
3798	j140626a	1	2	2/3	negative	pyramidal	unknown	7	5	positive	pyramidal	pyramidal	5.02886	299.319	299.361
3798	j140626a	1	8	2/3	negative	pyramidal	unknown	7	5	positive	pyramidal	pyramidal	38.9046	296.671	299.211
3798	j140626b	1	2	2/3	negative	pyramidal	unknown	4	5	positive	unknown	pyramidal	57.2309	332.733	337.619
3798	j140626b	1	2	2/3	negative	pyramidal	unknown	5	5	positive	unknown	pyramidal	6.5677	365.557	365.616
3798	j140626b	1	8	2/3	negative	unknown	pyramidal	4	5	positive	unknown	pyramidal	87.21	317.262	329.03
3798	j140626b	1	8	2/3	negative	unknown	pyramidal	5	5	positive	unknown	pyramidal	32.9234	350.086	351.631
4009	j140801b	1	1	2/3	positive	pyramidal	unknown	5	5	negative	pyramidal	unknown
4010	j140803a	1	1	2/3	positive	pyramidal	pyramidal	4	5	negative	pyramidal	pyramidal	33.121	340.477	342.084
4010	j140803a	1	1	2/3	positive	pyramidal	pyramidal	5	5	negative	pyramidal	pyramidal	40.2677	315.687	318.245
4010	j140803a	1	1	2/3	positive	pyramidal	pyramidal	6	5	negative	pyramidal	pyramidal	47.6697	241.018	245.687
4312	j140911b	1	7	2/3	negative	pyramidal	pyramidal	2	5	positive	pyramidal	unknown	86.1403	87.9799	123.128
4312	j140911b	1	7	2/3	negative	pyramidal	pyramidal	6	5	positive	pyramidal	unknown	59.2059	132.823	145.421
4965	j141216a	1	1	2/3	negative	pyramidal	pyramidal	4	5	positive	pyramidal	unknown	25.1437	503.012	503.64
4965	j141216a	1	2	2/3	negative	pyramidal	pyramidal	4	5	positive	pyramidal	unknown	106.974	420.655	434.043
4965	j141216a	1	3A	2/3	negative	pyramidal	unknown	4	5	positive	pyramidal	unknown	34.711	361.678	363.339
4965	j141216a	1	3B	2/3	positive	pyramidal	unknown	5B	5	negative	pyramidal	pyramidal	87.9574	385.3	395.212
4965	j141216a	1	6	2/3	positive	pyramidal	unknown	5B	5	negative	pyramidal	pyramidal	57.2717	406.883	410.894
4965	j141216a	1	7	2/3	positive	pyramidal	pyramidal	5B	5	negative	pyramidal	pyramidal	51.9025	465.804	468.687
4965	j141216a	1	8	2/3	negative	pyramidal	pyramidal	4	5	positive	pyramidal	unknown	52.7365	490.076	492.905
4971	j141219a	1	1	2/3	negative	pyramidal	unknown	5	5	positive	unknown	pyramidal	13.0586	460.474	460.66
4971	j141219a	1	2	2/3	positive	pyramidal	unknown	4	5	negative	pyramidal	pyramidal	62.4487	580.764	584.112
4971	j141219a	1	8	2/3	negative	pyramidal	unknown	5	5	positive	unknown	pyramidal	28.1265	463.886	464.738
4971	j141219b	1	1B	2/3	positive	pyramidal	pyramidal	5	5	negative	pyramidal	pyramidal	91.3422	323.65	336.293
4971	j141219b	1	7A	2/3	negative	pyramidal	unknown	4	5	positive	pyramidal	pyramidal	25.9333	398.098	398.941
4971	j141219b	1	8	2/3	positive	pyramidal	unknown	5	5	negative	pyramidal	pyramidal	74.4928	360.475	368.091
5191	j150114b	1	1	2/3	positive	pyramidal	unknown	5	5	negative	pyramidal	pyramidal
5191	j150114b	1	1	2/3	positive	pyramidal	unknown	6	5	negative	pyramidal	pyramidal
5191	j150114b	1	2	2/3	positive	pyramidal	pyramidal	5	5	negative	pyramidal	pyramidal	103.84	328.769	344.778
5191	j150114b	1	2	2/3	positive	pyramidal	pyramidal	6	5	negative	pyramidal	pyramidal	88.3221	242.263	257.861
5191	j150114b	1	7	2/3	negative	pyramidal	pyramidal	4	5	positive	pyramidal	pyramidal	58.0915	361.606	366.242
5191	j150114b	1	8	2/3	negative	pyramidal	unknown	4	5	positive	pyramidal	pyramidal
5191	j150114c	1	1	2/3	negative	pyramidal	unknown	3	5	positive	pyramidal	pyramidal
5191	j150114c	1	2	2/3	positive	pyramidal	unknown	4	5	negative	pyramidal	pyramidal
5191	j150114c	1	2	2/3	positive	pyramidal	unknown	5	5	negative	unknown	pyramidal
5191	j150114c	1	2	2/3	positive	pyramidal	unknown	6	5	negative	pyramidal	unknown
5191	j150114c	1	7	2/3	negative	pyramidal	unknown	3	5	positive	pyramidal	pyramidal
5308	j150125a	1	1	2/3	positive	pyramidal	pyramidal	5	5	negative	pyramidal	unknown	62.0267	229.793	238.017
5308	j150125a	1	8	2/3	negative	pyramidal	unknown	4	5	positive	pyramidal	pyramidal	136.019	263.333	296.387
5541	j150224a	1	1	2/3	positive	pyramidal	pyramidal	5	5	negative	pyramidal	pyramidal	76.9491	275.384	285.933
5541	j150224a	1	1	2/3	positive	pyramidal	pyramidal	6	5	negative	pyramidal	pyramidal	69.1697	221.275	231.834
5541	j150224a	1	8	2/3	negative	pyramidal	unknown	4	5	positive	pyramidal	pyramidal	98.9235	240.247	259.817
5818	j150409c	1	1	2/3	positive	pyramidal	pyramidal	5	5	negative	pyramidal	pyramidal	65.1889	280.736	288.206
5818	j150409c	1	2	2/3	positive	pyramidal	pyramidal	5	5	negative	pyramidal	pyramidal	91.3832	138.289	165.755
6558	j150731b	1	2	2/3	positive	pyramidal	pyramidal	5	5	negative	pyramidal	unknown	56.9895	361.95	366.409
6558	j150731b	1	8	2/3	positive	pyramidal	pyramidal	5	5	negative	pyramidal	unknown	41.4579	388.5	390.706
8780	j160217a	1	1	2/3	positive	pyramidal	pyramidal	4	5	negative	pyramidal	pyramidal	130.568	384.599	406.159
8780	j160217a	1	2	2/3	positive	pyramidal	pyramidal	4	5	negative	pyramidal	pyramidal	65.075	356.131	362.028
8780	j160217a	1	6	2/3	negative	pyramidal	pyramidal	3	5	positive	pyramidal	pyramidal	9.58936	351.335	351.466
8780	j160217a	1	6	2/3	negative	pyramidal	pyramidal	5	5	positive	pyramidal	pyramidal	64.038	234.046	242.648
8780	j160217b	1	1	2/3	positive	pyramidal	pyramidal	5	5	negative	pyramidal	pyramidal	12.8053	291.181	291.463
8780	j160217b	1	8	2/3	positive	pyramidal	pyramidal	5	5	negative	pyramidal	pyramidal	64.1799	282.508	289.707
3200	j140508a	1	3	4	positive	pyramidal	unknown	1	2/3	positive	pyramidal	pyramidal	37.9613	182.299	186.21
3200	j140508a	1	3	4	positive	pyramidal	unknown	2	2/3	positive	pyramidal	pyramidal	4.34532	124.966	125.041
3200	j140508a	1	7	4	positive	pyramidal	unknown	1	2/3	positive	pyramidal	pyramidal	19.6868	94.511	96.5396
3200	j140508a	1	7	4	positive	pyramidal	unknown	2	2/3	positive	pyramidal	pyramidal	59.2789	37.1776	69.9725
3200	j140508b	1	6	4	positive	pyramidal	pyramidal	2	2/3	positive	pyramidal	pyramidal	44.8479	200.963	205.907
3200	j140508b	1	6	4	positive	pyramidal	pyramidal	8	2/3	positive	pyramidal	unknown	7.47026	238.398	238.515
3207	j140509a	1	7	4	positive	pyramidal	unknown	1	2/3	positive	pyramidal	pyramidal	11.1276	145.564	145.988
3269	j140207b	1	2	4	positive	pyramidal	pyramidal	1	2/3	positive	pyramidal	pyramidal	71.0814	221.997	233.099
3269	j140207b	1	2	4	positive	pyramidal	pyramidal	8	2/3	positive	pyramidal	pyramidal	89.8342	266.859	281.574
3269	j140207b	1	7	4	positive	pyramidal	pyramidal	1	2/3	positive	pyramidal	pyramidal	123.219	213.533	246.534
3269	j140207b	1	7	4	positive	pyramidal	pyramidal	8	2/3	positive	pyramidal	pyramidal	37.746	258.394	261.136
3270	j140208a	1	7	4	positive	pyramidal	unknown	1	2/3	positive	pyramidal	unknown	19.05	244.136	244.878
3270	j140208a	1	7	4	positive	pyramidal	unknown	2	2/3	positive	pyramidal	pyramidal	26.2536	90.7818	94.5017
3270	j140208b	1	3A	4	positive	pyramidal	pyramidal	1	2/3	positive	pyramidal	pyramidal	88.7234	168.635	190.551
3270	j140208b	1	3A	4	positive	pyramidal	pyramidal	7	2/3	positive	pyramidal	pyramidal	17.0935	114.077	115.35
3270	j140208b	1	6	4	positive	pyramidal	pyramidal	1	2/3	positive	pyramidal	pyramidal	139.386	165.007	216
3270	j140208b	1	6	4	positive	pyramidal	pyramidal	7	2/3	positive	pyramidal	pyramidal	33.7282	110.449	115.484
3270	j140208c	1	3	4	positive	pyramidal	pyramidal	1	2/3	positive	pyramidal	pyramidal	6.28756	230.403	230.489
3270	j140208c	1	3	4	positive	pyramidal	pyramidal	2	2/3	positive	pyramidal	unknown	28.5111	90.8778	95.2453
3270	j140208c	1	3	4	positive	pyramidal	pyramidal	8	2/3	positive	pyramidal	unknown	60.9832	290.332	296.667
3305	j140523a	1	2B	4	positive	pyramidal	unknown	1	2/3	positive	pyramidal	unknown	28.9326	347.605	348.807
3305	j140523a	1	3	4	positive	pyramidal	unknown	1	2/3	positive	pyramidal	unknown	18.7246	356.903	357.394
3305	j140523a	1	6	4	positive	pyramidal	unknown	1	2/3	positive	pyramidal	unknown	40.0908	275.235	278.139
3788	j140624a	1	6	4	positive	pyramidal	unknown	1	2/3	positive	pyramidal	pyramidal	85.0451	240.035	254.656
3788	j140624b	1	2	4	positive	pyramidal	unknown	1	2/3	positive	pyramidal	pyramidal	41.6237	201.309	205.568
3788	j140624b	1	2	4	positive	pyramidal	unknown	7	2/3	positive	pyramidal	pyramidal	126.452	86.5462	153.233
3788	j140624c	1	2	4	positive	pyramidal	unknown	1	2/3	positive	pyramidal	unknown	41.8481	208.935	213.085
3788	j140624c	1	3	4	positive	pyramidal	unknown	1	2/3	positive	pyramidal	unknown	40.7408	266.432	269.529
3791	j140630a	1	2	4	positive	pyramidal	unknown	1	2/3	positive	pyramidal	pyramidal	16.8482	291.97	292.455
3791	j140630a	1	6	4	positive	unknown	pyramidal	1	2/3	positive	pyramidal	pyramidal	12.8746	349.23	349.467
3791	j140630a	1	7	4	positive	pyramidal	unknown	1	2/3	positive	pyramidal	pyramidal	79.122	222.422	236.076
3791	j140630c	1	2	4	positive	pyramidal	pyramidal	1	2/3	positive	pyramidal	pyramidal	18.9238	140.676	141.943
3791	j140630c	1	7	4	positive	unknown	pyramidal	1	2/3	positive	pyramidal	pyramidal	28.4491	190.802	192.911
3793	j140625a	1	3	4	positive	unknown	pyramidal	1	2/3	positive	pyramidal	pyramidal	23.6845	305.878	306.794
3793	j140625a	1	3	4	positive	unknown	pyramidal	7	2/3	positive	pyramidal	pyramidal	38.7071	210.92	214.442
3793	j140625b	1	6A	4	positive	unknown	pyramidal	1	2/3	positive	pyramidal	pyramidal	22.9375	272.865	273.827
3793	j140625b	1	6A	4	positive	unknown	pyramidal	2	2/3	positive	pyramidal	pyramidal	23.5366	250.574	251.677
3793	j140625b	1	7	4	positive	pyramidal	unknown	1	2/3	positive	pyramidal	pyramidal	77.6779	216.704	230.205
3793	j140625b	1	7	4	positive	pyramidal	unknown	2	2/3	positive	pyramidal	pyramidal	78.7364	194.413	209.752
3793	j140625b	1	8	4	positive	pyramidal	unknown	1	2/3	positive	pyramidal	pyramidal	10.6085	241.765	241.998
3793	j140625b	1	8	4	positive	pyramidal	unknown	2	2/3	positive	pyramidal	pyramidal	8.34962	219.475	219.633
3794	j140627a	1	2	4	positive	pyramidal	unknown	8	2/3	positive	pyramidal	pyramidal	1.52952	70.9221	70.9386
3794	j140627a	1	7	4	positive	pyramidal	unknown	8	2/3	positive	pyramidal	pyramidal	6.7752	115.01	115.209
3798	j140626a	1	3	4	positive	pyramidal	unknown	1	2/3	positive	pyramidal	pyramidal	76.4793	262.579	273.49
3798	j140626b	1	6	4	positive	pyramidal	unknown	1	2/3	positive	unknown	pyramidal	8.01322	126.288	126.542
3798	j140626b	1	7	4	positive	pyramidal	unknown	1	2/3	positive	unknown	pyramidal	60.7112	125.596	139.5
4010	j140803a	1	2	4	positive	pyramidal	pyramidal	1	2/3	positive	pyramidal	pyramidal	19.9785	145.353	146.72
4312	j140911a	1	3	4	positive	pyramidal	unknown	1	2/3	positive	pyramidal	pyramidal	69.6223	199.118	210.938
4312	j140911a	1	3	4	positive	pyramidal	unknown	2	2/3	positive	pyramidal	pyramidal	30.4141	106.28	110.546
4971	j141219a	1	6	4	positive	pyramidal	unknown	2	2/3	positive	pyramidal	unknown	12.7408	331.936	332.18
4971	j141219a	1	7	4	positive	pyramidal	unknown	2	2/3	positive	pyramidal	unknown	66.5397	256.043	264.548
4971	j141219b	1	3	4	positive	pyramidal	pyramidal	1B	2/3	positive	pyramidal	pyramidal	8.04835	125.6	125.858
4971	j141219b	1	3	4	positive	pyramidal	pyramidal	8	2/3	positive	pyramidal	unknown	13.3447	162.425	162.973
5308	j150125a	1	2	4	positive	pyramidal	unknown	1	2/3	positive	pyramidal	pyramidal	20.9723	93.9185	96.2316
5818	j150409c	1	3	4	positive	pyramidal	unknown	1	2/3	positive	pyramidal	pyramidal	74.3436	171.19	186.636
5818	j150409c	1	3	4	positive	pyramidal	unknown	2	2/3	positive	pyramidal	pyramidal	50.2836	28.7424	57.9186
6558	j150731a	1	3	4	positive	pyramidal	stellate	2	2/3	positive	pyramidal	pyramidal	69.4867	157.666	172.299
6558	j150731b	1	3	4	positive	pyramidal	stellate	2	2/3	positive	pyramidal	pyramidal	22.5293	347.334	348.064
6558	j150731b	1	3	4	positive	pyramidal	stellate	8	2/3	positive	pyramidal	pyramidal	110.498	373.884	389.87
6558	j150731b	1	6	4	positive	pyramidal	stellate	2	2/3	positive	pyramidal	pyramidal	60.8156	312.175	318.043
6558	j150731b	1	6	4	positive	pyramidal	stellate	8	2/3	positive	pyramidal	pyramidal	39.5762	338.725	341.029
6558	j150731c	1	2	4	positive	pyramidal	stellate	8	2/3	positive	pyramidal	pyramidal	153.739	108.848	188.371
6558	j150731c	1	3	4	positive	pyramidal	stellate	8	2/3	positive	pyramidal	pyramidal	178.119	132.005	221.701
6558	j150731c	1	4	4	positive	pyramidal	stellate	8	2/3	positive	pyramidal	pyramidal	147.663	152.637	212.373
7287	j151027a	1	5	4	positive	pyramidal	unknown	1	2/3	positive	pyramidal	pyramidal	49.0737	189.412	195.666
7287	j151027a	1	5	4	positive	pyramidal	unknown	2	2/3	positive	pyramidal	pyramidal	119.549	49.2003	129.277
7287	j151027a	1	6	4	positive	pyramidal	pyramidal	1	2/3	positive	pyramidal	pyramidal	80.72	184.738	201.603
7287	j151027a	1	6	4	positive	pyramidal	pyramidal	2	2/3	positive	pyramidal	pyramidal	150.802	44.527	157.239
7287	j151027a	1	7	4	positive	pyramidal	pyramidal	1	2/3	positive	pyramidal	pyramidal	119.363	128.05	175.056
7287	j151027a	1	7	4	positive	pyramidal	pyramidal	2	2/3	positive	pyramidal	pyramidal	189.668	12.161	190.057
7288	j151026a	1	2	4	positive	pyramidal	pyramidal	1	2/3	positive	pyramidal	pyramidal	15.2008	106.524	107.603
7288	j151026a	1	2	4	positive	pyramidal	pyramidal	8	2/3	positive	pyramidal	pyramidal	27.2037	80.0274	84.5247
7288	j151026a	1	4	4	positive	pyramidal	pyramidal	8	2/3	positive	pyramidal	pyramidal	22.6388	127.495	129.49
7288	j151026a	1	5	4	positive	pyramidal	pyramidal	8	2/3	positive	pyramidal	pyramidal	110.416	74.6883	133.305
7288	j151026a	1	6	4	positive	pyramidal	pyramidal	8	2/3	positive	pyramidal	pyramidal	60.3627	76.5851	97.5138
7288	j151026a	1	7	4	positive	pyramidal	pyramidal	8	2/3	positive	pyramidal	pyramidal	78.5145	46.2218	91.1097
9972	j160512a	1	5	4	positive	pyramidal	pyramidal	2	2/3	positive	pyramidal	pyramidal	43.0785	94.5107	103.865
9972	j160512a	1	5	4	positive	pyramidal	pyramidal	7	2/3	positive	pyramidal	unknown	37.3074	183.318	187.075
9972	j160512a	1	5	4	positive	pyramidal	pyramidal	8	2/3	positive	pyramidal	unknown	54.6598	200.533	207.849
9972	j160512b	1	5	4	positive	pyramidal	pyramidal	2	2/3	positive	pyramidal	unknown	36.4571	160.929	165.007
9972	j160512b	1	5	4	positive	pyramidal	pyramidal	3	2/3	positive	pyramidal	pyramidal	8.52107	100.386	100.747
10390	j160620a	1	6	4	positive	pyramidal	unknown	1	2/3	positive	pyramidal	unknown	50.6345	116.939	127.43
10390	j160620a	1	6	4	positive	pyramidal	unknown	2	2/3	positive	pyramidal	unknown	53.8556	60.3882	80.9145
10390	j160620a	1	6	4	positive	pyramidal	unknown	3	2/3	positive	pyramidal	unknown	65.1709	4.31055	65.3133
10390	j160620b	1	5	4	positive	pyramidal	pyramidal	8	2/3	positive	pyramidal	pyramidal	4.91623	83.3608	83.5056
10390	j160620b	1	6	4	positive	pyramidal	pyramidal	8	2/3	positive	pyramidal	pyramidal	11.6452	48.4742	49.8533
11508	j160929a	1	3	4	positive	pyramidal	unknown	7	2/3	positive	pyramidal	pyramidal	5.52343	139.504	139.613
12981	j161122a	1	4	4	positive	pyramidal	stellate	2	2/3	positive	pyramidal	unknown	72.168	125.109	144.432
12981	j161122a	1	6	4	positive	pyramidal	unknown	2	2/3	positive	pyramidal	unknown	59.6619	147.733	159.326
12983	j161123a	1	4	4	positive	pyramidal	unknown	3	2/3	positive	pyramidal	unknown	16.3492	51.7003	54.2238
12983	j161123a	1	5	4	positive	pyramidal	unknown	3	2/3	positive	pyramidal	unknown	85.7679	17.865	87.6087
3200	j140508a	1	3	4	positive	pyramidal	unknown	8	2/3	negative	pyramidal	pyramidal	79.4962	156.963	175.946
3200	j140508a	1	6	4	negative	pyramidal	unknown	1	2/3	positive	pyramidal	pyramidal	34.1289	186.4	189.499
3200	j140508a	1	6	4	negative	pyramidal	unknown	2	2/3	positive	pyramidal	pyramidal	72.6982	129.067	148.133
3200	j140508a	1	7	4	positive	pyramidal	unknown	8	2/3	negative	pyramidal	pyramidal	23.9719	69.1747	73.2106
3200	j140508b	1	3	4	negative	pyramidal	pyramidal	2	2/3	positive	pyramidal	pyramidal	31.3843	202.667	205.082
3200	j140508b	1	3	4	negative	pyramidal	pyramidal	8	2/3	positive	pyramidal	unknown	17.0585	240.101	240.707
3200	j140508b	1	6	4	positive	pyramidal	pyramidal	1	2/3	negative	pyramidal	unknown	43.9937	275.473	278.964
3200	j140508b	1	6	4	positive	pyramidal	pyramidal	7	2/3	negative	pyramidal	unknown	12.3878	192.039	192.438
3207	j140509a	1	2	4	negative	pyramidal	pyramidal	1	2/3	positive	pyramidal	pyramidal	89.592	205.26	223.961
3207	j140509a	1	7	4	positive	pyramidal	unknown	8B	2/3	negative	pyramidal	unknown	42.3253	96.1111	105.018
3270	j140208a	1	3	4	negative	pyramidal	pyramidal	1	2/3	positive	pyramidal	unknown	5.13015	274.991	275.039
3270	j140208a	1	3	4	negative	pyramidal	pyramidal	2	2/3	positive	pyramidal	pyramidal	2.35788	121.637	121.66
3270	j140208a	1	7	4	positive	pyramidal	unknown	8	2/3	negative	pyramidal	unknown	66.6822	169.983	182.594
3270	j140208b	1	3A	4	positive	pyramidal	pyramidal	2	2/3	negative	pyramidal	pyramidal	62.9257	115.869	131.853
3270	j140208b	1	3A	4	positive	pyramidal	pyramidal	8	2/3	negative	pyramidal	pyramidal	3.7162	149.049	149.095
3270	j140208b	1	3B	4	negative	pyramidal	unknown	1	2/3	positive	pyramidal	pyramidal	90.4816	200.489	219.961
3270	j140208b	1	3B	4	negative	pyramidal	unknown	7	2/3	positive	pyramidal	pyramidal	15.1835	145.931	146.719
3270	j140208b	1	6	4	positive	pyramidal	pyramidal	2	2/3	negative	pyramidal	pyramidal	113.574	112.242	159.679
3270	j140208b	1	6	4	positive	pyramidal	pyramidal	8	2/3	negative	pyramidal	pyramidal	48.5403	145.421	153.309
3270	j140208c	1	3	4	positive	pyramidal	pyramidal	7	2/3	negative	pyramidal	unknown	6.26477	121.81	121.971
3270	j140208c	1	6B	4	negative	pyramidal	pyramidal	1	2/3	positive	pyramidal	pyramidal	68.5175	171.829	184.986
3270	j140208c	1	6B	4	negative	pyramidal	pyramidal	2	2/3	positive	pyramidal	unknown	90.9674	32.3037	96.5329
3270	j140208c	1	6B	4	negative	pyramidal	pyramidal	8	2/3	positive	pyramidal	unknown	20.532	231.758	232.665
3305	j140523a	1	2A	4	negative	pyramidal	unknown	1	2/3	positive	pyramidal	unknown	20.8448	291.684	292.428
3305	j140523a	1	2B	4	positive	pyramidal	unknown	7	2/3	negative	pyramidal	pyramidal	113.743	226.088	253.088
3305	j140523a	1	2B	4	positive	pyramidal	unknown	8	2/3	negative	pyramidal	unknown	105.063	313.603	330.734
3305	j140523a	1	3	4	positive	pyramidal	unknown	7	2/3	negative	pyramidal	pyramidal	75.0016	235.386	247.046
3305	j140523a	1	3	4	positive	pyramidal	unknown	8	2/3	negative	pyramidal	unknown	66.3128	322.901	329.639
3305	j140523a	1	6	4	positive	pyramidal	unknown	7	2/3	negative	pyramidal	pyramidal	59.4917	153.718	164.828
3305	j140523a	1	6	4	positive	pyramidal	unknown	8	2/3	negative	pyramidal	unknown	51.0288	241.233	246.571
3784	j140623b	1	7	4	positive	pyramidal	pyramidal	1	2/3	negative	pyramidal	unknown	29.7168	174.289	176.804
3788	j140624a	1	6	4	positive	pyramidal	unknown	7	2/3	negative	pyramidal	pyramidal	174.365	281.397	331.04
3788	j140624b	1	2	4	positive	pyramidal	unknown	8	2/3	negative	pyramidal	pyramidal	26.8566	165.041	167.212
3788	j140624b	1	3	4	negative	pyramidal	pyramidal	1	2/3	positive	pyramidal	pyramidal	32.2383	244.435	246.551
3788	j140624b	1	3	4	negative	pyramidal	pyramidal	7	2/3	positive	pyramidal	pyramidal	137.627	129.671	189.092
3788	j140624b	1	6	4	negative	pyramidal	pyramidal	1	2/3	positive	pyramidal	pyramidal	100.888	268.607	286.929
3788	j140624b	1	6	4	negative	pyramidal	pyramidal	7	2/3	positive	pyramidal	pyramidal	67.8885	153.844	168.157
3788	j140624c	1	2	4	positive	pyramidal	unknown	7	2/3	negative	pyramidal	unknown	8.4287	121.202	121.495
3788	j140624c	1	3	4	positive	pyramidal	unknown	7	2/3	negative	pyramidal	unknown	12.0833	178.699	179.107
3788	j140624c	1	6B	4	negative	pyramidal	unknown	1	2/3	positive	pyramidal	unknown	60.7008	248.856	256.152
3791	j140630a	1	2	4	positive	pyramidal	unknown	8	2/3	negative	pyramidal	pyramidal	38.4654	248.918	251.872
3791	j140630a	1	6	4	positive	unknown	pyramidal	8	2/3	negative	pyramidal	pyramidal	33.8249	306.178	308.04
3791	j140630a	1	7	4	positive	pyramidal	unknown	8	2/3	negative	pyramidal	pyramidal	55.1215	179.37	187.648
3791	j140630b	1	2	4	positive	pyramidal	unknown	8	2/3	negative	unknown	pyramidal	48.9848	283.529	287.729
3791	j140630b	1	6	4	positive	unknown	pyramidal	8	2/3	negative	unknown	pyramidal	76.4281	348.364	356.65
3791	j140630b	1	7	4	positive	unknown	pyramidal	8	2/3	negative	unknown	pyramidal	46.8982	287.592	291.391
3791	j140630c	1	2	4	positive	pyramidal	pyramidal	8	2/3	negative	pyramidal	pyramidal	44.3988	191.811	196.883
3791	j140630c	1	3	4	negative	pyramidal	unknown	1	2/3	positive	pyramidal	pyramidal	94.0363	177.856	201.185
3791	j140630c	1	6	4	negative	pyramidal	unknown	1	2/3	positive	pyramidal	pyramidal	73.5837	196.729	210.04
3791	j140630c	1	7	4	positive	unknown	pyramidal	8	2/3	negative	pyramidal	pyramidal	31.7282	241.937	244.009
3793	j140625a	1	3	4	positive	unknown	pyramidal	8	2/3	negative	pyramidal	pyramidal	34.4931	283.604	285.694
3793	j140625a	1	6	4	negative	pyramidal	unknown	1	2/3	positive	pyramidal	pyramidal	66.588	295.872	303.273
3793	j140625a	1	6	4	negative	pyramidal	unknown	7	2/3	positive	pyramidal	pyramidal	8.10212	200.914	201.077
3793	j140625b	1	6A	4	positive	unknown	pyramidal	3	2/3	negative	pyramidal	pyramidal	4.33506	216.821	216.865
3793	j140625b	1	6B	4	negative	pyramidal	unknown	1	2/3	positive	pyramidal	pyramidal	13.5571	261.784	262.135
3793	j140625b	1	6B	4	negative	pyramidal	unknown	2	2/3	positive	pyramidal	pyramidal	10.2963	239.493	239.714
3793	j140625b	1	7	4	positive	pyramidal	unknown	3	2/3	negative	pyramidal	pyramidal	58.3808	160.66	170.939
3793	j140625b	1	8	4	positive	pyramidal	unknown	3	2/3	negative	pyramidal	pyramidal	28.732	185.722	187.931
3794	j140627a	1	2	4	positive	pyramidal	unknown	1	2/3	negative	pyramidal	unknown	100.022	62.0274	117.694
3794	j140627a	1	3	4	negative	pyramidal	unknown	8	2/3	positive	pyramidal	pyramidal	13.8872	79.6311	80.8329
3794	j140627a	1	7	4	positive	pyramidal	unknown	1	2/3	negative	pyramidal	unknown	99.0192	106.115	145.139
3794	j140627b	1	2	4	negative	pyramidal	unknown	1	2/3	positive	pyramidal	pyramidal	14.4028	85.5528	86.7567
3794	j140627b	1	3	4	negative	pyramidal	pyramidal	1	2/3	positive	pyramidal	pyramidal	25.515	108.008	110.981
3794	j140627b	1	6	4	negative	pyramidal	unknown	1	2/3	positive	pyramidal	pyramidal	9.45284	119.837	120.21
3795	j140629a	1	2	4	positive	pyramidal	unknown	8	2/3	negative	pyramidal	pyramidal	28.6206	186.951	189.129
3795	j140629a	1	7	4	positive	pyramidal	unknown	8	2/3	negative	pyramidal	pyramidal	53.5865	209.752	216.488
3798	j140626a	1	3	4	positive	pyramidal	unknown	2	2/3	negative	pyramidal	unknown	69.2161	233.754	243.786
3798	j140626a	1	3	4	positive	pyramidal	unknown	8	2/3	negative	pyramidal	unknown	111.588	231.106	256.635
3798	j140626a	1	4	4	negative	pyramidal	unknown	1	2/3	positive	pyramidal	pyramidal	63.0205	321.735	327.849
3798	j140626b	1	3	4	negative	pyramidal	unknown	1	2/3	positive	unknown	pyramidal	44.1722	116.183	124.297
3798	j140626b	1	6	4	positive	pyramidal	unknown	2	2/3	negative	pyramidal	unknown	40.755	115.026	122.033
3798	j140626b	1	6	4	positive	pyramidal	unknown	8	2/3	negative	unknown	pyramidal	71.2009	99.5555	122.396
3798	j140626b	1	7	4	positive	pyramidal	unknown	2	2/3	negative	pyramidal	unknown	13.3943	114.334	115.116
3798	j140626b	1	7	4	positive	pyramidal	unknown	8	2/3	negative	unknown	pyramidal	18.6244	98.8636	100.603
4009	j140801b	1	3	4	negative	pyramidal	unknown	1	2/3	positive	pyramidal	unknown
4009	j140801b	1	6	4	negative	pyramidal	unknown	1	2/3	positive	pyramidal	unknown
4010	j140803a	1	2	4	positive	pyramidal	pyramidal	8	2/3	negative	pyramidal	pyramidal	13.9003	130.672	131.409
4010	j140803a	1	7	4	negative	pyramidal	unknown	1	2/3	positive	pyramidal	pyramidal	54.4882	114.303	126.626
4312	j140911a	1	3	4	positive	pyramidal	unknown	7	2/3	negative	pyramidal	unknown	47.6982	83.6226	96.2697
4312	j140911a	1	3	4	positive	pyramidal	unknown	8	2/3	negative	pyramidal	unknown	72.9815	184.244	198.172
4312	j140911a	1	6	4	negative	pyramidal	unknown	1	2/3	positive	pyramidal	pyramidal	52.8194	203.479	210.223
4312	j140911a	1	6	4	negative	pyramidal	unknown	2	2/3	positive	pyramidal	pyramidal	14.4856	110.642	111.586
4965	j141216b	1	2	4	positive	pyramidal	unknown	1	2/3	negative	pyramidal	unknown	34.9255	58.2659	67.9316
4965	j141216b	1	7	4	positive	pyramidal	pyramidal	1	2/3	negative	pyramidal	unknown	16.9453	80.2918	82.0604
4971	j141219a	1	3	4	negative	pyramidal	pyramidal	2	2/3	positive	pyramidal	unknown	87.0977	322.907	334.447
4971	j141219a	1	6	4	positive	pyramidal	unknown	1	2/3	negative	pyramidal	unknown	8.36201	342.308	342.411
4971	j141219a	1	6	4	positive	pyramidal	unknown	8	2/3	negative	pyramidal	unknown	34.2008	345.72	347.408
4971	j141219a	1	7	4	positive	pyramidal	unknown	1	2/3	negative	pyramidal	unknown	63.2404	266.416	273.819
4971	j141219a	1	7	4	positive	pyramidal	unknown	8	2/3	negative	pyramidal	unknown	34.4468	269.828	272.018
4971	j141219b	1	2	4	positive	pyramidal	pyramidal	7A	2/3	negative	pyramidal	unknown	32.939	142.617	146.372
4971	j141219b	1	2	4	positive	pyramidal	pyramidal	7B	2/3	negative	unknown	pyramidal	71.1397	105.475	127.223
4971	j141219b	1	3	4	positive	pyramidal	pyramidal	7A	2/3	negative	pyramidal	unknown	38.61	195.919	199.688
4971	j141219b	1	6B	4	negative	pyramidal	pyramidal	1B	2/3	positive	pyramidal	pyramidal	53.7317	142.196	152.01
4971	j141219b	1	6B	4	negative	pyramidal	pyramidal	8	2/3	positive	pyramidal	unknown	35.9482	179.021	182.595
5191	j150114a	1	3	4	negative	pyramidal	unknown	1	2/3	positive	pyramidal	pyramidal	44.4653	230.564	234.813
5191	j150114b	1	3	4	negative	pyramidal	unknown	1	2/3	positive	pyramidal	unknown
5191	j150114b	1	3	4	negative	pyramidal	unknown	2	2/3	positive	pyramidal	pyramidal
5308	j150125a	1	2	4	positive	pyramidal	unknown	8	2/3	negative	pyramidal	unknown	135.701	145.839	199.208
5308	j150125a	1	3	4	negative	pyramidal	unknown	1	2/3	positive	pyramidal	pyramidal	14.2144	99.0517	100.066
5308	j150125a	1	7	4	negative	pyramidal	stellate	1	2/3	positive	pyramidal	pyramidal	33.136	71.9277	79.1934
5541	j150224a	1	3	4	negative	pyramidal	stellate	1	2/3	positive	pyramidal	pyramidal	38.0024	172.209	176.352
6558	j150731a	1	3	4	positive	pyramidal	stellate	1	2/3	negative	pyramidal	pyramidal	48.7752	191.712	197.82
6558	j150731a	1	3	4	positive	pyramidal	stellate	7	2/3	negative	pyramidal	pyramidal	169.791	170.572	240.674
6558	j150731a	1	6	4	positive	pyramidal	stellate	1	2/3	negative	pyramidal	pyramidal	43.1409	199.837	204.441
6558	j150731a	1	6	4	positive	pyramidal	stellate	7	2/3	negative	pyramidal	pyramidal	78.2899	178.697	195.095
6558	j150731b	1	3	4	positive	pyramidal	stellate	1	2/3	negative	pyramidal	pyramidal	70.5648	417.315	423.239
6558	j150731b	1	3	4	positive	pyramidal	stellate	7	2/3	negative	pyramidal	pyramidal	110.91	221.679	247.876
6558	j150731b	1	4	4	negative	pyramidal	unknown	2	2/3	positive	pyramidal	pyramidal	23.0848	311.105	311.96
6558	j150731b	1	4	4	negative	pyramidal	unknown	8	2/3	positive	pyramidal	pyramidal	75.0631	337.654	345.897
6558	j150731b	1	6	4	positive	pyramidal	stellate	1	2/3	negative	pyramidal	pyramidal	10.6297	382.156	382.304
6558	j150731b	1	6	4	positive	pyramidal	stellate	7	2/3	negative	pyramidal	pyramidal	39.9376	186.52	190.748
6558	j150731c	1	2	4	positive	pyramidal	stellate	1	2/3	negative	pyramidal	pyramidal	17.8224	88.6906	90.4636
6558	j150731c	1	3	4	positive	pyramidal	stellate	1	2/3	negative	pyramidal	pyramidal	7.11937	111.847	112.073
6558	j150731c	1	4	4	positive	pyramidal	stellate	1	2/3	negative	pyramidal	pyramidal	23.5262	132.479	134.552
6558	j150731c	1	7	4	negative	pyramidal	stellate	8	2/3	positive	pyramidal	pyramidal	44.5909	108.976	117.746
7023	j150929a	1	3	4	negative	pyramidal	unknown	1	2/3	positive	pyramidal	pyramidal	30.1148	124.302	127.898
7023	j150929a	1	3	4	negative	pyramidal	unknown	2	2/3	positive	pyramidal	pyramidal	63.9771	63.319	90.0132
7287	j151027a	1	3	4	negative	pyramidal	unknown	1	2/3	positive	pyramidal	pyramidal	2.64752	176.205	176.225
7287	j151027a	1	3	4	negative	pyramidal	unknown	2	2/3	positive	pyramidal	pyramidal	68.4375	35.9942	77.3258
7287	j151027a	1	5	4	positive	pyramidal	unknown	8	2/3	negative	pyramidal	pyramidal	59.1621	104.132	119.765
7287	j151027a	1	6	4	positive	pyramidal	pyramidal	8	2/3	negative	pyramidal	pyramidal	90.3996	99.4591	134.403
7287	j151027a	1	7	4	positive	pyramidal	pyramidal	8	2/3	negative	pyramidal	pyramidal	129.238	42.7711	136.132
7288	j151026a	1	3	4	negative	pyramidal	pyramidal	8	2/3	positive	pyramidal	pyramidal	11.4105	99.5035	100.156
9972	j160512a	1	4	4	negative	pyramidal	unknown	2	2/3	positive	pyramidal	pyramidal	19.6723	112.419	114.127
9972	j160512a	1	4	4	negative	pyramidal	unknown	7	2/3	positive	pyramidal	unknown	79.4231	201.226	216.333
9972	j160512a	1	4	4	negative	pyramidal	unknown	8	2/3	positive	pyramidal	unknown	96.8312	218.442	238.941
9972	j160512a	1	5	4	positive	pyramidal	pyramidal	3	2/3	negative	pyramidal	pyramidal	4.75022	136.518	136.6
9972	j160512a	1	5	4	positive	pyramidal	pyramidal	6	2/3	negative	pyramidal	pyramidal	40.4794	105.821	113.299
9972	j160512b	1	4	4	negative	pyramidal	pyramidal	2	2/3	positive	pyramidal	unknown	61.384	172.168	182.783
9972	j160512b	1	4	4	negative	pyramidal	pyramidal	3	2/3	positive	pyramidal	pyramidal	31.0877	111.625	115.873
9972	j160512b	1	5	4	positive	pyramidal	pyramidal	6	2/3	negative	pyramidal	pyramidal	25.2579	94.9212	98.2242
9972	j160512b	1	5	4	positive	pyramidal	pyramidal	7	2/3	negative	pyramidal	unknown	44.5681	143.478	150.241
10390	j160620a	1	5	4	negative	pyramidal	pyramidal	1	2/3	positive	pyramidal	unknown	63.248	159.034	171.149
10390	j160620a	1	5	4	negative	pyramidal	pyramidal	2	2/3	positive	pyramidal	unknown	67.2004	102.483	122.551
10390	j160620a	1	5	4	negative	pyramidal	pyramidal	3	2/3	positive	pyramidal	unknown	78.4013	37.7845	87.0312
10390	j160620a	1	6	4	positive	pyramidal	unknown	7	2/3	negative	pyramidal	unknown	13.8075	49.0616	50.9675
10390	j160620a	1	6	4	positive	pyramidal	unknown	8	2/3	negative	pyramidal	unknown	30.0577	130.735	134.146
10390	j160620b	1	4	4	negative	pyramidal	unknown	8	2/3	positive	pyramidal	pyramidal	73.7673	57.5331	93.5504
10390	j160620b	1	5	4	positive	pyramidal	pyramidal	2	2/3	negative	pyramidal	unknown	77.7318	93.5255	121.611
10390	j160620b	1	6	4	positive	pyramidal	pyramidal	2	2/3	negative	pyramidal	unknown	82.9779	58.6389	101.606
11508	j160929a	1	6	4	negative	pyramidal	stellate	7	2/3	positive	pyramidal	pyramidal	34.3281	102.456	108.054
11509	j160929c	1	6	4	negative	pyramidal	stellate	2	2/3	positive	pyramidal	pyramidal	9.26754	98.1093	98.546
12981	j161122a	1	4	4	positive	pyramidal	stellate	7	2/3	negative	pyramidal	unknown	89.446	102.207	135.819
12981	j161122a	1	5	4	negative	pyramidal	stellate	2	2/3	positive	pyramidal	unknown	28.0378	143.848	146.555
12981	j161122a	1	6	4	positive	pyramidal	unknown	7	2/3	negative	pyramidal	unknown	16.1811	124.831	125.875
12983	j161123a	1	4	4	positive	pyramidal	unknown	2	2/3	negative	pyramidal	pyramidal	10.0564	127.958	128.353
12983	j161123a	1	4	4	positive	pyramidal	unknown	6	2/3	negative	pyramidal	unknown	57.2209	65.8063	87.205
12983	j161123a	1	5	4	positive	pyramidal	unknown	2	2/3	negative	pyramidal	pyramidal	60.4742	94.1228	111.876
12983	j161123a	1	5	4	positive	pyramidal	unknown	6	2/3	negative	pyramidal	unknown	13.1926	31.971	34.5859
3200	j140508a	1	3	4	positive	pyramidal	unknown	7	4	positive	pyramidal	unknown	55.7956	87.7881	104.019
3200	j140508a	1	7	4	positive	pyramidal	unknown	3	4	positive	pyramidal	unknown	55.7956	87.7881	104.019
3269	j140207b	1	2	4	positive	pyramidal	pyramidal	7	4	positive	pyramidal	pyramidal	52.1553	8.4646	52.8378
3269	j140207b	1	7	4	positive	pyramidal	pyramidal	2	4	positive	pyramidal	pyramidal	52.1553	8.4646	52.8378
3270	j140208b	1	3A	4	positive	pyramidal	pyramidal	6	4	positive	pyramidal	pyramidal	50.7015	3.62739	50.8311
3270	j140208b	1	6	4	positive	pyramidal	pyramidal	3A	4	positive	pyramidal	pyramidal	50.7015	3.62739	50.8311
3305	j140523a	1	2B	4	positive	pyramidal	unknown	3	4	positive	pyramidal	unknown	38.8509	9.29765	39.9479
3305	j140523a	1	2B	4	positive	pyramidal	unknown	6	4	positive	pyramidal	unknown	58.2114	72.3704	92.8765
3305	j140523a	1	3	4	positive	pyramidal	unknown	2B	4	positive	pyramidal	unknown	38.8509	9.29765	39.9479
3305	j140523a	1	3	4	positive	pyramidal	unknown	6	4	positive	pyramidal	unknown	21.6081	81.668	84.4783
3305	j140523a	1	6	4	positive	pyramidal	unknown	2B	4	positive	pyramidal	unknown	58.2114	72.3704	92.8765
3305	j140523a	1	6	4	positive	pyramidal	unknown	3	4	positive	pyramidal	unknown	21.6081	81.668	84.4783
3788	j140624c	1	2	4	positive	pyramidal	unknown	3	4	positive	pyramidal	unknown	5.5847	57.4968	57.7674
3788	j140624c	1	2	4	positive	pyramidal	unknown	6A	4	positive	pyramidal	unknown	52.7646	78.017	94.1847
3788	j140624c	1	3	4	positive	pyramidal	unknown	2	4	positive	pyramidal	unknown	5.5847	57.4968	57.7674
3788	j140624c	1	3	4	positive	pyramidal	unknown	6A	4	positive	pyramidal	unknown	58.3244	20.5202	61.8289
3791	j140630a	1	2	4	positive	pyramidal	unknown	6	4	positive	unknown	pyramidal	4.64111	57.2602	57.4479
3791	j140630a	1	2	4	positive	pyramidal	unknown	7	4	positive	pyramidal	unknown	93.5204	69.5478	116.546
3791	j140630a	1	6	4	positive	unknown	pyramidal	2	4	positive	pyramidal	unknown	4.64111	57.2602	57.4479
3791	j140630a	1	6	4	positive	unknown	pyramidal	7	4	positive	pyramidal	unknown	88.8815	126.808	154.855
3791	j140630a	1	7	4	positive	pyramidal	unknown	2	4	positive	pyramidal	unknown	93.5204	69.5478	116.546
3791	j140630a	1	7	4	positive	pyramidal	unknown	6	4	positive	unknown	pyramidal	88.8815	126.808	154.855
3791	j140630b	1	2	4	positive	pyramidal	unknown	6	4	positive	unknown	pyramidal	115.913	64.8354	132.813
3791	j140630b	1	2	4	positive	pyramidal	unknown	7	4	positive	unknown	pyramidal	80.5647	4.06293	80.6671
3791	j140630b	1	6	4	positive	unknown	pyramidal	2	4	positive	pyramidal	unknown	115.913	64.8354	132.813
3791	j140630b	1	6	4	positive	unknown	pyramidal	7	4	positive	unknown	pyramidal	35.8915	60.7725	70.5797
3791	j140630b	1	7	4	positive	unknown	pyramidal	2	4	positive	pyramidal	unknown	80.5647	4.06293	80.6671
3791	j140630b	1	7	4	positive	unknown	pyramidal	6	4	positive	unknown	pyramidal	35.8915	60.7725	70.5797
3791	j140630c	1	2	4	positive	pyramidal	pyramidal	7	4	positive	unknown	pyramidal	12.941	50.1257	51.7692
3791	j140630c	1	7	4	positive	unknown	pyramidal	2	4	positive	pyramidal	pyramidal	12.941	50.1257	51.7692
3793	j140625b	1	6A	4	positive	unknown	pyramidal	7	4	positive	pyramidal	unknown	55.2351	56.1609	78.7716
3793	j140625b	1	6A	4	positive	unknown	pyramidal	8	4	positive	pyramidal	unknown	31.5724	31.0997	44.3171
3793	j140625b	1	7	4	positive	pyramidal	unknown	6A	4	positive	unknown	pyramidal	55.2351	56.1609	78.7716
3793	j140625b	1	7	4	positive	pyramidal	unknown	8	4	positive	pyramidal	unknown	86.8043	25.0612	90.3496
3793	j140625b	1	8	4	positive	pyramidal	unknown	6A	4	positive	unknown	pyramidal	31.5724	31.0997	44.3171
3793	j140625b	1	8	4	positive	pyramidal	unknown	7	4	positive	pyramidal	unknown	86.8043	25.0612	90.3496
3794	j140627a	1	2	4	positive	pyramidal	unknown	7	4	positive	pyramidal	unknown	6.52458	44.0876	44.5678
3794	j140627a	1	7	4	positive	pyramidal	unknown	2	4	positive	pyramidal	unknown	6.52458	44.0876	44.5678
3795	j140629a	1	2	4	positive	pyramidal	unknown	7	4	positive	pyramidal	unknown	76.3945	22.8008	79.7245
3795	j140629a	1	7	4	positive	pyramidal	unknown	2	4	positive	pyramidal	unknown	76.3945	22.8008	79.7245
3798	j140626b	1	6	4	positive	pyramidal	unknown	7	4	positive	pyramidal	unknown	52.8912	0.691886	52.8957
3798	j140626b	1	7	4	positive	pyramidal	unknown	6	4	positive	pyramidal	unknown	52.8912	0.691886	52.8957
4965	j141216b	1	2	4	positive	pyramidal	unknown	7	4	positive	pyramidal	pyramidal	26.2117	22.0259	34.2373
4965	j141216b	1	7	4	positive	pyramidal	pyramidal	2	4	positive	pyramidal	unknown	26.2117	22.0259	34.2373
4971	j141219a	1	6	4	positive	pyramidal	unknown	7	4	positive	pyramidal	unknown	55.0579	75.8924	93.7605
4971	j141219a	1	7	4	positive	pyramidal	unknown	6	4	positive	pyramidal	unknown	55.0579	75.8924	93.7605
4971	j141219b	1	2	4	positive	pyramidal	pyramidal	3	4	positive	pyramidal	pyramidal	5.67228	53.3023	53.6032
4971	j141219b	1	3	4	positive	pyramidal	pyramidal	2	4	positive	pyramidal	pyramidal	5.67228	53.3023	53.6032
5308	j150125b	1	2	4	positive	pyramidal	unknown	7	4	positive	pyramidal	unknown	109.451	43.6263	117.825
5308	j150125b	1	7	4	positive	pyramidal	unknown	2	4	positive	pyramidal	unknown	109.451	43.6263	117.825
6558	j150731a	1	3	4	positive	pyramidal	stellate	6	4	positive	pyramidal	stellate	91.891	8.12479	92.2495
6558	j150731a	1	6	4	positive	pyramidal	stellate	3	4	positive	pyramidal	stellate	91.891	8.12479	92.2495
6558	j150731b	1	3	4	positive	pyramidal	stellate	6	4	positive	pyramidal	stellate	71.1971	35.1589	79.4052
6558	j150731b	1	6	4	positive	pyramidal	stellate	3	4	positive	pyramidal	stellate	71.1971	35.1589	79.4052
6558	j150731c	1	2	4	positive	pyramidal	stellate	3	4	positive	pyramidal	stellate	24.831	23.1563	33.9528
6558	j150731c	1	2	4	positive	pyramidal	stellate	4	4	positive	pyramidal	stellate	9.20808	43.7889	44.7465
6558	j150731c	1	3	4	positive	pyramidal	stellate	2	4	positive	pyramidal	stellate	24.831	23.1563	33.9528
6558	j150731c	1	3	4	positive	pyramidal	stellate	4	4	positive	pyramidal	stellate	30.5874	20.6325	36.8956
6558	j150731c	1	4	4	positive	pyramidal	stellate	2	4	positive	pyramidal	stellate	9.20808	43.7889	44.7465
6558	j150731c	1	4	4	positive	pyramidal	stellate	3	4	positive	pyramidal	stellate	30.5874	20.6325	36.8956
7287	j151027a	1	5	4	positive	pyramidal	unknown	6	4	positive	pyramidal	pyramidal	32.0111	4.67337	32.3504
7287	j151027a	1	5	4	positive	pyramidal	unknown	7	4	positive	pyramidal	pyramidal	70.3168	61.3614	93.3256
7287	j151027a	1	6	4	positive	pyramidal	pyramidal	5	4	positive	pyramidal	unknown	32.0111	4.67337	32.3504
7287	j151027a	1	6	4	positive	pyramidal	pyramidal	7	4	positive	pyramidal	pyramidal	38.9661	56.688	68.7887
7287	j151027a	1	7	4	positive	pyramidal	pyramidal	5	4	positive	pyramidal	unknown	70.3168	61.3614	93.3256
7287	j151027a	1	7	4	positive	pyramidal	pyramidal	6	4	positive	pyramidal	pyramidal	38.9661	56.688	68.7887
7288	j151026a	1	2	4	positive	pyramidal	pyramidal	4	4	positive	pyramidal	pyramidal	5.46491	47.4679	47.7815
7288	j151026a	1	2	4	positive	pyramidal	pyramidal	5	4	positive	pyramidal	pyramidal	136.452	5.33906	136.556
7288	j151026a	1	2	4	positive	pyramidal	pyramidal	6	4	positive	pyramidal	pyramidal	86.1912	3.44227	86.2599
7288	j151026a	1	2	4	positive	pyramidal	pyramidal	7	4	positive	pyramidal	pyramidal	104.757	33.8056	110.077
7288	j151026a	1	4	4	positive	pyramidal	pyramidal	2	4	positive	pyramidal	pyramidal	5.46491	47.4679	47.7815
7288	j151026a	1	4	4	positive	pyramidal	pyramidal	5	4	positive	pyramidal	pyramidal	131.179	52.807	141.409
7288	j151026a	1	4	4	positive	pyramidal	pyramidal	6	4	positive	pyramidal	pyramidal	80.9206	50.9102	95.6033
7288	j151026a	1	4	4	positive	pyramidal	pyramidal	7	4	positive	pyramidal	pyramidal	99.5403	81.2735	128.505
7288	j151026a	1	5	4	positive	pyramidal	pyramidal	2	4	positive	pyramidal	pyramidal	136.452	5.33906	136.556
7288	j151026a	1	5	4	positive	pyramidal	pyramidal	4	4	positive	pyramidal	pyramidal	131.179	52.807	141.409
7288	j151026a	1	5	4	positive	pyramidal	pyramidal	6	4	positive	pyramidal	pyramidal	50.2606	1.89679	50.2964
7288	j151026a	1	5	4	positive	pyramidal	pyramidal	7	4	positive	pyramidal	pyramidal	31.9513	28.4665	42.7928
7288	j151026a	1	6	4	positive	pyramidal	pyramidal	2	4	positive	pyramidal	pyramidal	86.1912	3.44227	86.2599
7288	j151026a	1	6	4	positive	pyramidal	pyramidal	4	4	positive	pyramidal	pyramidal	80.9206	50.9102	95.6033
7288	j151026a	1	6	4	positive	pyramidal	pyramidal	5	4	positive	pyramidal	pyramidal	50.2606	1.89679	50.2964
7288	j151026a	1	6	4	positive	pyramidal	pyramidal	7	4	positive	pyramidal	pyramidal	18.8696	30.3633	35.749
7288	j151026a	1	7	4	positive	pyramidal	pyramidal	2	4	positive	pyramidal	pyramidal	104.757	33.8056	110.077
7288	j151026a	1	7	4	positive	pyramidal	pyramidal	4	4	positive	pyramidal	pyramidal	99.5403	81.2735	128.505
7288	j151026a	1	7	4	positive	pyramidal	pyramidal	5	4	positive	pyramidal	pyramidal	31.9513	28.4665	42.7928
7288	j151026a	1	7	4	positive	pyramidal	pyramidal	6	4	positive	pyramidal	pyramidal	18.8696	30.3633	35.749
8778	j160215b	1	1	4	positive	pyramidal	stellate	2	4	positive	pyramidal	stellate	15.3838	9.13483	17.8916
8778	j160215b	1	1	4	positive	pyramidal	stellate	6	4	positive	pyramidal	stellate	56.6187	52.3277	77.0965
8778	j160215b	1	2	4	positive	pyramidal	stellate	1	4	positive	pyramidal	stellate	15.3838	9.13483	17.8916
8778	j160215b	1	2	4	positive	pyramidal	stellate	6	4	positive	pyramidal	stellate	66.7388	43.1929	79.4965
8778	j160215b	1	6	4	positive	pyramidal	stellate	1	4	positive	pyramidal	stellate	56.6187	52.3277	77.0965
8778	j160215b	1	6	4	positive	pyramidal	stellate	2	4	positive	pyramidal	stellate	66.7388	43.1929	79.4965
10390	j160620b	1	5	4	positive	pyramidal	pyramidal	6	4	positive	pyramidal	pyramidal	13.7502	34.8866	37.4986
10390	j160620b	1	6	4	positive	pyramidal	pyramidal	5	4	positive	pyramidal	pyramidal	13.7502	34.8866	37.4986
12981	j161122a	1	4	4	positive	pyramidal	stellate	6	4	positive	pyramidal	unknown	89.9407	22.6241	92.7426
12981	j161122a	1	6	4	positive	pyramidal	unknown	4	4	positive	pyramidal	stellate	89.9407	22.6241	92.7426
12982	j161122b	1	2	4	positive	pyramidal	unknown	7	4	positive	pyramidal	unknown	20.5721	9.18872	22.531
12982	j161122b	1	7	4	positive	pyramidal	unknown	2	4	positive	pyramidal	unknown	20.5721	9.18872	22.531
12983	j161123a	1	4	4	positive	pyramidal	unknown	5	4	positive	pyramidal	unknown	69.8783	33.8353	77.6389
12983	j161123a	1	5	4	positive	pyramidal	unknown	4	4	positive	pyramidal	unknown	69.8783	33.8353	77.6389
3200	j140508a	1	3	4	positive	pyramidal	unknown	6	4	negative	pyramidal	unknown	68.9948	4.1012	69.1166
3200	j140508a	1	6	4	negative	pyramidal	unknown	3	4	positive	pyramidal	unknown	68.9948	4.1012	69.1166
3200	j140508a	1	6	4	negative	pyramidal	unknown	7	4	positive	pyramidal	unknown	14.5056	91.8893	93.0271
3200	j140508a	1	7	4	positive	pyramidal	unknown	6	4	negative	pyramidal	unknown	14.5056	91.8893	93.0271
3200	j140508b	1	3	4	negative	pyramidal	pyramidal	6	4	positive	pyramidal	pyramidal	19.1236	1.70345	19.1993
3200	j140508b	1	6	4	positive	pyramidal	pyramidal	3	4	negative	pyramidal	pyramidal	19.1236	1.70345	19.1993
3207	j140509a	1	2	4	negative	pyramidal	pyramidal	7	4	positive	pyramidal	unknown	100.661	59.6966	117.031
3207	j140509a	1	7	4	positive	pyramidal	unknown	2	4	negative	pyramidal	pyramidal	100.661	59.6966	117.031
3270	j140208a	1	3	4	negative	pyramidal	pyramidal	7	4	positive	pyramidal	unknown	24.0257	30.8549	39.1058
3270	j140208a	1	7	4	positive	pyramidal	unknown	3	4	negative	pyramidal	pyramidal	24.0257	30.8549	39.1058
3270	j140208b	1	3B	4	negative	pyramidal	unknown	6	4	positive	pyramidal	pyramidal	48.9083	35.4819	60.4234
3270	j140208b	1	6	4	positive	pyramidal	pyramidal	3B	4	negative	pyramidal	unknown	48.9083	35.4819	60.4234
3270	j140208c	1	3	4	positive	pyramidal	pyramidal	6B	4	negative	pyramidal	pyramidal	63.0292	58.5741	86.0442
3270	j140208c	1	6B	4	negative	pyramidal	pyramidal	3	4	positive	pyramidal	pyramidal	63.0292	58.5741	86.0442
3305	j140523a	1	2A	4	negative	pyramidal	unknown	3	4	positive	pyramidal	unknown	20.6637	65.2192	68.4144
3305	j140523a	1	2A	4	negative	pyramidal	unknown	6	4	positive	pyramidal	unknown	38.1411	16.4488	41.5368
3305	j140523a	1	3	4	positive	pyramidal	unknown	2A	4	negative	pyramidal	unknown	20.6637	65.2192	68.4144
3305	j140523a	1	6	4	positive	pyramidal	unknown	2A	4	negative	pyramidal	unknown	38.1411	16.4488	41.5368
3784	j140623b	1	3	4	negative	unknown	pyramidal	7	4	positive	pyramidal	pyramidal	75.8825	59.7589	96.5882
3784	j140623b	1	7	4	positive	pyramidal	pyramidal	3	4	negative	unknown	pyramidal	75.8825	59.7589	96.5882
3788	j140624b	1	2	4	positive	pyramidal	unknown	3	4	negative	pyramidal	pyramidal	12.4269	43.1251	44.8798
3788	j140624b	1	2	4	positive	pyramidal	unknown	6	4	negative	pyramidal	pyramidal	59.2717	67.2974	89.6776
3788	j140624b	1	3	4	negative	pyramidal	pyramidal	2	4	positive	pyramidal	unknown	12.4269	43.1251	44.8798
3788	j140624b	1	6	4	negative	pyramidal	pyramidal	2	4	positive	pyramidal	unknown	59.2717	67.2974	89.6776
3788	j140624c	1	2	4	positive	pyramidal	unknown	6B	4	negative	pyramidal	unknown	29.0707	39.9208	49.384
3788	j140624c	1	3	4	positive	pyramidal	unknown	6B	4	negative	pyramidal	unknown	34.5636	17.576	38.7757
3788	j140624c	1	6B	4	negative	pyramidal	unknown	2	4	positive	pyramidal	unknown	29.0707	39.9208	49.384
3788	j140624c	1	6B	4	negative	pyramidal	unknown	3	4	positive	pyramidal	unknown	34.5636	17.576	38.7757
3791	j140630b	1	2	4	positive	pyramidal	unknown	3	4	negative	unknown	pyramidal	17.8826	64.2196	66.6629
3791	j140630b	1	3	4	negative	unknown	pyramidal	2	4	positive	pyramidal	unknown	17.8826	64.2196	66.6629
3791	j140630b	1	3	4	negative	unknown	pyramidal	6	4	positive	unknown	pyramidal	101.301	0.615829	101.303
3791	j140630b	1	3	4	negative	unknown	pyramidal	7	4	positive	unknown	pyramidal	65.478	60.1566	88.9168
3791	j140630b	1	6	4	positive	unknown	pyramidal	3	4	negative	unknown	pyramidal	101.301	0.615829	101.303
3791	j140630b	1	7	4	positive	unknown	pyramidal	3	4	negative	unknown	pyramidal	65.478	60.1566	88.9168
3791	j140630c	1	2	4	positive	pyramidal	pyramidal	3	4	negative	pyramidal	unknown	82.1022	37.1795	90.1281
3791	j140630c	1	2	4	positive	pyramidal	pyramidal	6	4	negative	pyramidal	unknown	61.1567	56.0524	82.9579
3791	j140630c	1	3	4	negative	pyramidal	unknown	2	4	positive	pyramidal	pyramidal	82.1022	37.1795	90.1281
3791	j140630c	1	3	4	negative	pyramidal	unknown	7	4	positive	unknown	pyramidal	69.1649	12.9462	70.3661
3791	j140630c	1	6	4	negative	pyramidal	unknown	2	4	positive	pyramidal	pyramidal	61.1567	56.0524	82.9579
3791	j140630c	1	6	4	negative	pyramidal	unknown	7	4	positive	unknown	pyramidal	48.2171	5.92678	48.58
3791	j140630c	1	7	4	positive	unknown	pyramidal	3	4	negative	pyramidal	unknown	69.1649	12.9462	70.3661
3791	j140630c	1	7	4	positive	unknown	pyramidal	6	4	negative	pyramidal	unknown	48.2171	5.92678	48.58
3793	j140625a	1	3	4	positive	unknown	pyramidal	6	4	negative	pyramidal	unknown	45.7899	10.0059	46.8704
3793	j140625a	1	6	4	negative	pyramidal	unknown	3	4	positive	unknown	pyramidal	45.7899	10.0059	46.8704
3793	j140625b	1	6B	4	negative	pyramidal	unknown	7	4	positive	pyramidal	unknown	89.0301	45.0797	99.7925
3793	j140625b	1	6B	4	negative	pyramidal	unknown	8	4	positive	pyramidal	unknown	3.02301	20.0185	20.2455
3793	j140625b	1	7	4	positive	pyramidal	unknown	6B	4	negative	pyramidal	unknown	89.0301	45.0797	99.7925
3793	j140625b	1	8	4	positive	pyramidal	unknown	6B	4	negative	pyramidal	unknown	3.02301	20.0185	20.2455
3794	j140627a	1	2	4	positive	pyramidal	unknown	3	4	negative	pyramidal	unknown	12.6355	8.709	15.3461
3794	j140627a	1	3	4	negative	pyramidal	unknown	2	4	positive	pyramidal	unknown	12.6355	8.709	15.3461
3794	j140627a	1	3	4	negative	pyramidal	unknown	7	4	positive	pyramidal	unknown	9.82399	35.3786	36.7172
3794	j140627a	1	7	4	positive	pyramidal	unknown	3	4	negative	pyramidal	unknown	9.82399	35.3786	36.7172
3795	j140629a	1	2	4	positive	pyramidal	unknown	6	4	negative	pyramidal	unknown	34.6579	0.550237	34.6623
3795	j140629a	1	6	4	negative	pyramidal	unknown	2	4	positive	pyramidal	unknown	34.6579	0.550237	34.6623
3795	j140629a	1	6	4	negative	pyramidal	unknown	7	4	positive	pyramidal	unknown	41.8783	23.351	47.9485
3795	j140629a	1	7	4	positive	pyramidal	unknown	6	4	negative	pyramidal	unknown	41.8783	23.351	47.9485
3798	j140626a	1	3	4	positive	pyramidal	unknown	4	4	negative	pyramidal	unknown	18.5367	59.1556	61.9919
3798	j140626a	1	4	4	negative	pyramidal	unknown	3	4	positive	pyramidal	unknown	18.5367	59.1556	61.9919
3798	j140626b	1	3	4	negative	pyramidal	unknown	6	4	positive	pyramidal	unknown	36.2429	10.1048	37.6252
3798	j140626b	1	3	4	negative	pyramidal	unknown	7	4	positive	pyramidal	unknown	16.9768	9.41288	19.4117
3798	j140626b	1	6	4	positive	pyramidal	unknown	3	4	negative	pyramidal	unknown	36.2429	10.1048	37.6252
3798	j140626b	1	7	4	positive	pyramidal	unknown	3	4	negative	pyramidal	unknown	16.9768	9.41288	19.4117
4010	j140803a	1	2	4	positive	pyramidal	pyramidal	7	4	negative	pyramidal	unknown	36.4108	31.0495	47.8521
4010	j140803a	1	7	4	negative	pyramidal	unknown	2	4	positive	pyramidal	pyramidal	36.4108	31.0495	47.8521
4312	j140911a	1	3	4	positive	pyramidal	unknown	6	4	negative	pyramidal	unknown	23.5942	4.36163	23.9939
4312	j140911a	1	6	4	negative	pyramidal	unknown	3	4	positive	pyramidal	unknown	23.5942	4.36163	23.9939
4965	j141216b	1	2	4	positive	pyramidal	unknown	3	4	negative	pyramidal	unknown	78.0487	14.1775	79.3259
4965	j141216b	1	3	4	negative	pyramidal	unknown	2	4	positive	pyramidal	unknown	78.0487	14.1775	79.3259
4965	j141216b	1	3	4	negative	pyramidal	unknown	7	4	positive	pyramidal	pyramidal	104.234	7.84843	104.529
4965	j141216b	1	7	4	positive	pyramidal	pyramidal	3	4	negative	pyramidal	unknown	104.234	7.84843	104.529
4971	j141219a	1	3	4	negative	pyramidal	pyramidal	6	4	positive	pyramidal	unknown	96.9932	9.02884	97.4125
4971	j141219a	1	3	4	negative	pyramidal	pyramidal	7	4	positive	pyramidal	unknown	151.693	66.8636	165.775
4971	j141219a	1	6	4	positive	pyramidal	unknown	3	4	negative	pyramidal	pyramidal	96.9932	9.02884	97.4125
4971	j141219a	1	7	4	positive	pyramidal	unknown	3	4	negative	pyramidal	pyramidal	151.693	66.8636	165.775
4971	j141219b	1	2	4	positive	pyramidal	pyramidal	6A	4	negative	pyramidal	unknown	59.057	111.7	126.351
4971	j141219b	1	3	4	positive	pyramidal	pyramidal	6A	4	negative	pyramidal	unknown	64.7233	58.3974	87.1743
5308	j150125a	1	2	4	positive	pyramidal	unknown	3	4	negative	pyramidal	unknown	18.8925	5.13317	19.5775
5308	j150125a	1	2	4	positive	pyramidal	unknown	7	4	negative	pyramidal	stellate	53.7334	21.9908	58.0592
5308	j150125a	1	3	4	negative	pyramidal	unknown	2	4	positive	pyramidal	unknown	18.8925	5.13317	19.5775
5308	j150125a	1	7	4	negative	pyramidal	stellate	2	4	positive	pyramidal	unknown	53.7334	21.9908	58.0592
5308	j150125b	1	2	4	positive	pyramidal	unknown	8	4	negative	pyramidal	pyramidal	188.264	1.05242	188.267
5308	j150125b	1	7	4	positive	pyramidal	unknown	8	4	negative	pyramidal	pyramidal	78.8379	44.6787	90.6179
5308	j150125b	1	8	4	negative	pyramidal	pyramidal	2	4	positive	pyramidal	unknown	188.264	1.05242	188.267
5308	j150125b	1	8	4	negative	pyramidal	pyramidal	7	4	positive	pyramidal	unknown	78.8379	44.6787	90.6179
6558	j150731a	1	3	4	positive	pyramidal	stellate	4	4	negative	pyramidal	stellate	20.3783	65.4079	68.5089
6558	j150731a	1	4	4	negative	pyramidal	stellate	3	4	positive	pyramidal	stellate	20.3783	65.4079	68.5089
6558	j150731a	1	4	4	negative	pyramidal	stellate	6	4	positive	pyramidal	stellate	111.991	57.2831	125.791
6558	j150731a	1	6	4	positive	pyramidal	stellate	4	4	negative	pyramidal	stellate	111.991	57.2831	125.791
6558	j150731b	1	3	4	positive	pyramidal	stellate	4	4	negative	pyramidal	unknown	37.8142	36.2291	52.3685
6558	j150731b	1	4	4	negative	pyramidal	unknown	3	4	positive	pyramidal	stellate	37.8142	36.2291	52.3685
6558	j150731b	1	4	4	negative	pyramidal	unknown	6	4	positive	pyramidal	stellate	37.8054	1.07023	37.8206
6558	j150731b	1	6	4	positive	pyramidal	stellate	4	4	negative	pyramidal	unknown	37.8054	1.07023	37.8206
6558	j150731c	1	2	4	positive	pyramidal	stellate	7	4	negative	pyramidal	stellate	109.799	0.127457	109.799
6558	j150731c	1	3	4	positive	pyramidal	stellate	7	4	negative	pyramidal	stellate	134.411	23.0289	136.37
6558	j150731c	1	4	4	positive	pyramidal	stellate	7	4	negative	pyramidal	stellate	104.219	43.6614	112.995
6558	j150731c	1	7	4	negative	pyramidal	stellate	2	4	positive	pyramidal	stellate	109.799	0.127457	109.799
6558	j150731c	1	7	4	negative	pyramidal	stellate	3	4	positive	pyramidal	stellate	134.411	23.0289	136.37
6558	j150731c	1	7	4	negative	pyramidal	stellate	4	4	positive	pyramidal	stellate	104.219	43.6614	112.995
7287	j151027a	1	3	4	negative	pyramidal	unknown	5	4	positive	pyramidal	unknown	51.1256	13.2061	52.8037
7287	j151027a	1	3	4	negative	pyramidal	unknown	6	4	positive	pyramidal	pyramidal	82.6276	8.53277	83.067
7287	j151027a	1	3	4	negative	pyramidal	unknown	7	4	positive	pyramidal	pyramidal	121.355	48.1552	130.56
7287	j151027a	1	5	4	positive	pyramidal	unknown	3	4	negative	pyramidal	unknown	51.1256	13.2061	52.8037
7288	j151026a	1	2	4	positive	pyramidal	pyramidal	3	4	negative	pyramidal	pyramidal	17.1649	19.4761	25.9606
7288	j151026a	1	3	4	negative	pyramidal	pyramidal	2	4	positive	pyramidal	pyramidal	17.1649	19.4761	25.9606
7288	j151026a	1	3	4	negative	pyramidal	pyramidal	4	4	positive	pyramidal	pyramidal	11.9925	27.9918	30.4526
7288	j151026a	1	3	4	negative	pyramidal	pyramidal	5	4	positive	pyramidal	pyramidal	119.288	24.8152	121.842
7288	j151026a	1	3	4	negative	pyramidal	pyramidal	6	4	positive	pyramidal	pyramidal	69.0283	22.9184	72.7335
7288	j151026a	1	3	4	negative	pyramidal	pyramidal	7	4	positive	pyramidal	pyramidal	87.5974	53.2817	102.529
7288	j151026a	1	4	4	positive	pyramidal	pyramidal	3	4	negative	pyramidal	pyramidal	11.9925	27.9918	30.4526
7288	j151026a	1	5	4	positive	pyramidal	pyramidal	3	4	negative	pyramidal	pyramidal	119.288	24.8152	121.842
7288	j151026a	1	6	4	positive	pyramidal	pyramidal	3	4	negative	pyramidal	pyramidal	69.0283	22.9184	72.7335
7288	j151026a	1	7	4	positive	pyramidal	pyramidal	3	4	negative	pyramidal	pyramidal	87.5974	53.2817	102.529
8778	j160215b	1	1	4	positive	pyramidal	stellate	5	4	negative	pyramidal	unknown	22.8591	40.7105	46.6893
8778	j160215b	1	1	4	positive	pyramidal	stellate	7	4	negative	pyramidal	stellate	50.9823	8.15941	51.6311
8778	j160215b	1	2	4	positive	pyramidal	stellate	5	4	negative	pyramidal	unknown	28.8812	31.5757	42.7919
8778	j160215b	1	2	4	positive	pyramidal	stellate	7	4	negative	pyramidal	stellate	59.9756	0.975414	59.9835
8778	j160215b	1	5	4	negative	pyramidal	unknown	1	4	positive	pyramidal	stellate	22.8591	40.7105	46.6893
8778	j160215b	1	5	4	negative	pyramidal	unknown	2	4	positive	pyramidal	stellate	28.8812	31.5757	42.7919
8778	j160215b	1	5	4	negative	pyramidal	unknown	6	4	positive	pyramidal	stellate	38.3778	11.6172	40.0976
8778	j160215b	1	6	4	positive	pyramidal	stellate	5	4	negative	pyramidal	unknown	38.3778	11.6172	40.0976
8778	j160215b	1	6	4	positive	pyramidal	stellate	7	4	negative	pyramidal	stellate	8.28174	44.1683	44.9381
8778	j160215b	1	7	4	negative	pyramidal	stellate	1	4	positive	pyramidal	stellate	50.9823	8.15941	51.6311
8778	j160215b	1	7	4	negative	pyramidal	stellate	2	4	positive	pyramidal	stellate	59.9756	0.975414	59.9835
8778	j160215b	1	7	4	negative	pyramidal	stellate	6	4	positive	pyramidal	stellate	8.28174	44.1683	44.9381
9972	j160512a	1	4	4	negative	pyramidal	unknown	5	4	positive	pyramidal	pyramidal	42.1744	17.9084	45.8191
9972	j160512a	1	5	4	positive	pyramidal	pyramidal	4	4	negative	pyramidal	unknown	42.1744	17.9084	45.8191
9972	j160512b	1	4	4	negative	pyramidal	pyramidal	5	4	positive	pyramidal	pyramidal	26.4671	11.2389	28.7545
9972	j160512b	1	5	4	positive	pyramidal	pyramidal	4	4	negative	pyramidal	pyramidal	26.4671	11.2389	28.7545
10390	j160620a	1	5	4	negative	pyramidal	pyramidal	6	4	positive	pyramidal	unknown	13.3558	42.0951	44.1631
10390	j160620a	1	6	4	positive	pyramidal	unknown	5	4	negative	pyramidal	pyramidal	13.3558	42.0951	44.1631
10390	j160620b	1	4	4	negative	pyramidal	unknown	5	4	positive	pyramidal	pyramidal	76.5884	25.8277	80.826
10390	j160620b	1	4	4	negative	pyramidal	unknown	6	4	positive	pyramidal	pyramidal	81.9779	9.05894	82.4769
10390	j160620b	1	5	4	positive	pyramidal	pyramidal	4	4	negative	pyramidal	unknown	76.5884	25.8277	80.826
10390	j160620b	1	6	4	positive	pyramidal	pyramidal	4	4	negative	pyramidal	unknown	81.9779	9.05894	82.4769
11508	j160929a	1	3	4	positive	pyramidal	unknown	6	4	negative	pyramidal	stellate	30.4318	37.0477	47.944
11508	j160929a	1	6	4	negative	pyramidal	stellate	3	4	positive	pyramidal	unknown	30.4318	37.0477	47.944
12981	j161122a	1	4	4	positive	pyramidal	stellate	5	4	negative	pyramidal	stellate	47.7962	18.7385	51.3381
12981	j161122a	1	5	4	negative	pyramidal	stellate	4	4	positive	pyramidal	stellate	47.7962	18.7385	51.3381
12981	j161122a	1	5	4	negative	pyramidal	stellate	6	4	positive	pyramidal	unknown	52.6458	3.88565	52.789
12981	j161122a	1	6	4	positive	pyramidal	unknown	5	4	negative	pyramidal	stellate	52.6458	3.88565	52.789
12982	j161122b	1	2	4	positive	pyramidal	unknown	3	4	negative	pyramidal	unknown	4.34262	27.9325	28.2681
12982	j161122b	1	2	4	positive	pyramidal	unknown	6	4	negative	pyramidal	unknown	52.8544	16.0024	55.2237
12982	j161122b	1	3	4	negative	pyramidal	unknown	2	4	positive	pyramidal	unknown	4.34262	27.9325	28.2681
12982	j161122b	1	3	4	negative	pyramidal	unknown	7	4	positive	pyramidal	unknown	16.775	37.1212	40.7355
12982	j161122b	1	6	4	negative	pyramidal	unknown	2	4	positive	pyramidal	unknown	52.8544	16.0024	55.2237
12982	j161122b	1	6	4	negative	pyramidal	unknown	7	4	positive	pyramidal	unknown	34.7225	25.1911	42.8981
12982	j161122b	1	7	4	positive	pyramidal	unknown	3	4	negative	pyramidal	unknown	16.775	37.1212	40.7355
12982	j161122b	1	7	4	positive	pyramidal	unknown	6	4	negative	pyramidal	unknown	34.7225	25.1911	42.8981
3200	j140508b	1	6	4	positive	pyramidal	pyramidal	4	5	positive	pyramidal	pyramidal	41.118	157.78	163.05
3207	j140509a	1	7	4	positive	pyramidal	unknown	3	5	positive	pyramidal	pyramidal	214.161	455.299	503.152
3207	j140509a	1	7	4	positive	pyramidal	unknown	6	5	positive	pyramidal	unknown	95.0944	331.903	345.257
3269	j140207b	1	2	4	positive	pyramidal	pyramidal	3	5	positive	pyramidal	pyramidal	71.7306	102.028	124.72
3269	j140207b	1	2	4	positive	pyramidal	pyramidal	5	5	positive	unknown	pyramidal	29.1611	140.541	143.535
3269	j140207b	1	2	4	positive	pyramidal	pyramidal	6	5	positive	pyramidal	unknown	104.456	118.109	157.673
3269	j140207b	1	7	4	positive	pyramidal	pyramidal	3	5	positive	pyramidal	pyramidal	123.886	110.492	166.001
3269	j140207b	1	7	4	positive	pyramidal	pyramidal	5	5	positive	unknown	pyramidal	22.996	149.006	150.77
3269	j140207b	1	7	4	positive	pyramidal	pyramidal	6	5	positive	pyramidal	unknown	52.5147	126.574	137.035
3270	j140208a	1	7	4	positive	pyramidal	unknown	5	5	positive	pyramidal	pyramidal	18.5218	229.099	229.847
3270	j140208a	1	7	4	positive	pyramidal	unknown	6	5	positive	pyramidal	pyramidal	2.79585	110.752	110.787
3270	j140208b	1	3A	4	positive	pyramidal	pyramidal	5	5	positive	pyramidal	pyramidal	56.5444	117.029	129.973
3270	j140208b	1	6	4	positive	pyramidal	pyramidal	5	5	positive	pyramidal	pyramidal	6.20882	120.656	120.816
3270	j140208c	1	3	4	positive	pyramidal	pyramidal	5	5	positive	unknown	pyramidal	113.865	63.1298	130.195
3305	j140523a	1	3	4	positive	pyramidal	unknown	4	5	positive	pyramidal	unknown	50.5316	339.046	342.791
3305	j140523a	1	6	4	positive	pyramidal	unknown	4	5	positive	pyramidal	unknown	69.4271	420.714	426.404
3784	j140623b	1	7	4	positive	pyramidal	pyramidal	4	5	positive	pyramidal	pyramidal	35.0078	160.411	164.186
3788	j140624b	1	2	4	positive	pyramidal	unknown	4	5	positive	pyramidal	pyramidal	61.3877	279.228	285.897
3788	j140624b	1	2	4	positive	pyramidal	unknown	5A	5	positive	pyramidal	pyramidal	17.533	313.197	313.688
3788	j140624b	1	2	4	positive	pyramidal	unknown	5B	5	positive	pyramidal	pyramidal	88.5588	383.592	393.682
3788	j140624c	1	2	4	positive	pyramidal	unknown	4	5	positive	pyramidal	pyramidal	55.6034	241.724	248.037
3788	j140624c	1	2	4	positive	pyramidal	unknown	5	5	positive	pyramidal	pyramidal	55.1462	209.867	216.992
3788	j140624c	1	3	4	positive	pyramidal	unknown	4	5	positive	pyramidal	pyramidal	50.0893	184.227	190.915
3788	j140624c	1	3	4	positive	pyramidal	unknown	5	5	positive	pyramidal	pyramidal	49.6812	152.371	160.266
3791	j140630a	1	2	4	positive	pyramidal	unknown	3	5	positive	pyramidal	pyramidal	80.5229	220.925	235.142
3791	j140630a	1	2	4	positive	pyramidal	unknown	5	5	positive	pyramidal	pyramidal	142.024	172.808	223.681
3791	j140630a	1	6	4	positive	unknown	pyramidal	3	5	positive	pyramidal	pyramidal	75.8956	163.665	180.406
3791	j140630a	1	6	4	positive	unknown	pyramidal	5	5	positive	pyramidal	pyramidal	137.385	115.548	179.516
3791	j140630a	1	7	4	positive	pyramidal	unknown	3	5	positive	pyramidal	pyramidal	13.5625	290.473	290.789
3791	j140630a	1	7	4	positive	pyramidal	unknown	5	5	positive	pyramidal	pyramidal	48.5065	242.356	247.162
3791	j140630b	1	2	4	positive	pyramidal	unknown	5	5	positive	unknown	pyramidal	154.115	327.576	362.018
3791	j140630b	1	6	4	positive	unknown	pyramidal	5	5	positive	unknown	pyramidal	38.9323	262.74	265.609
3791	j140630b	1	7	4	positive	unknown	pyramidal	5	5	positive	unknown	pyramidal	74.7653	323.513	332.039
3791	j140630c	1	2	4	positive	pyramidal	pyramidal	4	5	positive	pyramidal	pyramidal	70.1056	355.46	362.307
3791	j140630c	1	7	4	positive	unknown	pyramidal	4	5	positive	pyramidal	pyramidal	57.3273	305.334	310.669
3793	j140625a	1	3	4	positive	unknown	pyramidal	4	5	positive	pyramidal	pyramidal	41.8125	404.252	406.408
3793	j140625a	1	3	4	positive	unknown	pyramidal	5	5	positive	unknown	pyramidal	57.9951	268.033	274.235
3793	j140625b	1	6A	4	positive	unknown	pyramidal	5	5	positive	pyramidal	pyramidal	58.1927	71.1589	91.9238
3793	j140625b	1	7	4	positive	pyramidal	unknown	5	5	positive	pyramidal	pyramidal	112.996	127.32	170.231
3793	j140625b	1	8	4	positive	pyramidal	unknown	5	5	positive	pyramidal	pyramidal	27.4541	102.259	105.88
3794	j140627a	1	2	4	positive	pyramidal	unknown	4	5	positive	pyramidal	pyramidal	32.5556	266.21	268.193
3794	j140627a	1	7	4	positive	pyramidal	unknown	4	5	positive	pyramidal	pyramidal	32.9649	222.122	224.555
3795	j140629a	1	2	4	positive	pyramidal	unknown	4	5	positive	pyramidal	pyramidal	7.00419	283.596	283.682
3795	j140629a	1	2	4	positive	pyramidal	unknown	5	5	positive	pyramidal	pyramidal	32.1898	289.029	290.816
3795	j140629a	1	7	4	positive	pyramidal	unknown	4	5	positive	pyramidal	pyramidal	81.208	260.795	273.146
3795	j140629a	1	7	4	positive	pyramidal	unknown	5	5	positive	pyramidal	pyramidal	44.2173	266.228	269.875
3798	j140626a	1	3	4	positive	pyramidal	unknown	7	5	positive	pyramidal	pyramidal	72.7658	65.565	97.9471
3798	j140626b	1	6	4	positive	pyramidal	unknown	4	5	positive	unknown	pyramidal	17.2459	217.707	218.389
3798	j140626b	1	6	4	positive	pyramidal	unknown	5	5	positive	unknown	pyramidal	38.6182	250.531	253.49
3798	j140626b	1	7	4	positive	pyramidal	unknown	4	5	positive	unknown	pyramidal	68.6556	218.398	228.936
3798	j140626b	1	7	4	positive	pyramidal	unknown	5	5	positive	unknown	pyramidal	14.3582	251.223	251.633
4971	j141219a	1	6	4	positive	pyramidal	unknown	5	5	positive	unknown	pyramidal	6.07723	118.166	118.322
4971	j141219a	1	7	4	positive	pyramidal	unknown	5	5	positive	unknown	pyramidal	50.4404	194.058	200.507
4971	j141219b	1	2	4	positive	pyramidal	pyramidal	4	5	positive	pyramidal	pyramidal	7.31995	255.48	255.585
4971	j141219b	1	3	4	positive	pyramidal	pyramidal	4	5	positive	pyramidal	pyramidal	12.8648	202.178	202.587
5308	j150125a	1	2	4	positive	pyramidal	unknown	4	5	positive	pyramidal	pyramidal	5.27439	117.494	117.612
5308	j150125b	1	2	4	positive	pyramidal	unknown	3	5	positive	pyramidal	pyramidal	66.1186	281.73	289.384
5308	j150125b	1	2	4	positive	pyramidal	unknown	4	5	positive	pyramidal	pyramidal	45.1327	325.763	328.874
5308	j150125b	1	7	4	positive	pyramidal	unknown	3	5	positive	pyramidal	pyramidal	47.3853	325.356	328.788
5308	j150125b	1	7	4	positive	pyramidal	unknown	4	5	positive	pyramidal	pyramidal	64.8865	369.389	375.044
5818	j150409c	1	3	4	positive	pyramidal	unknown	4	5	positive	pyramidal	unknown	41.2446	71.3546	82.4173
11508	j160929a	1	3	4	positive	pyramidal	unknown	4	5	positive	pyramidal	pyramidal	19.5972	102.284	104.145
3200	j140508a	1	3	4	positive	pyramidal	unknown	5B	5	negative	unknown	pyramidal	98.4137	103.136	142.557
3200	j140508a	1	7	4	positive	pyramidal	unknown	5B	5	negative	unknown	pyramidal	42.6338	190.924	195.627
3200	j140508b	1	3	4	negative	pyramidal	pyramidal	4	5	positive	pyramidal	pyramidal	24.4059	156.077	157.973
3207	j140509a	1	2	4	negative	pyramidal	pyramidal	3	5	positive	pyramidal	pyramidal	113.576	395.603	411.584
3207	j140509a	1	2	4	negative	pyramidal	pyramidal	6	5	positive	pyramidal	unknown	14.4916	272.206	272.592
3207	j140509a	1	7	4	positive	pyramidal	unknown	4	5	negative	pyramidal	pyramidal	159.619	464.166	490.844
3207	j140509a	1	7	4	positive	pyramidal	unknown	5B	5	negative	unknown	pyramidal	130.731	336.753	361.238
3270	j140208a	1	3	4	negative	pyramidal	pyramidal	5	5	positive	pyramidal	pyramidal	23.9653	198.244	199.688
3270	j140208a	1	3	4	negative	pyramidal	pyramidal	6	5	positive	pyramidal	pyramidal	26.3459	79.8967	84.1284
3270	j140208a	1	7	4	positive	pyramidal	unknown	4	5	negative	pyramidal	pyramidal	93.3345	235.085	252.936
3270	j140208b	1	3B	4	negative	pyramidal	unknown	5	5	positive	pyramidal	pyramidal	54.667	85.1741	101.208
3270	j140208b	1	6	4	positive	pyramidal	pyramidal	4B	5	negative	pyramidal	unknown	63.3753	123.071	138.43
3270	j140208c	1	3	4	positive	pyramidal	pyramidal	4	5	negative	pyramidal	pyramidal	106.858	137.823	174.396
3270	j140208c	1	6B	4	negative	pyramidal	pyramidal	5	5	positive	unknown	pyramidal	54.0038	121.704	133.148
3305	j140523a	1	2A	4	negative	pyramidal	unknown	4	5	positive	pyramidal	unknown	31.2905	404.265	405.474
3305	j140523a	1	2B	4	positive	pyramidal	unknown	5	5	negative	pyramidal	unknown	7.27072	247.847	247.954
3305	j140523a	1	3	4	positive	pyramidal	unknown	5	5	negative	pyramidal	unknown	40.6256	238.549	241.984
3305	j140523a	1	6	4	positive	pyramidal	unknown	5	5	negative	pyramidal	unknown	58.3354	320.217	325.488
3784	j140623b	1	3	4	negative	unknown	pyramidal	4	5	positive	pyramidal	pyramidal	42.2376	100.652	109.155
3784	j140623b	1	7	4	positive	pyramidal	pyramidal	5	5	negative	pyramidal	pyramidal	13.5891	263.031	263.382
3788	j140624a	1	6	4	positive	pyramidal	unknown	5	5	negative	pyramidal	unknown	89.0599	134.546	161.351
3788	j140624b	1	2	4	positive	pyramidal	unknown	5C	5	negative	pyramidal	unknown	16.5051	431.737	432.053
3788	j140624b	1	3	4	negative	pyramidal	pyramidal	4	5	positive	pyramidal	pyramidal	49.7451	236.103	241.287
3788	j140624b	1	3	4	negative	pyramidal	pyramidal	5A	5	positive	pyramidal	pyramidal	26.2315	270.072	271.343
3788	j140624b	1	3	4	negative	pyramidal	pyramidal	5B	5	positive	pyramidal	pyramidal	77.8744	340.467	349.259
3788	j140624b	1	6	4	negative	pyramidal	pyramidal	4	5	positive	pyramidal	pyramidal	119.588	211.931	243.343
3788	j140624b	1	6	4	negative	pyramidal	pyramidal	5A	5	positive	pyramidal	pyramidal	44.0276	245.9	249.81
3788	j140624b	1	6	4	negative	pyramidal	pyramidal	5B	5	positive	pyramidal	pyramidal	147.694	316.294	349.078
3788	j140624c	1	6B	4	negative	pyramidal	unknown	4	5	positive	pyramidal	pyramidal	84.6529	201.803	218.839
3788	j140624c	1	6B	4	negative	pyramidal	unknown	5	5	positive	pyramidal	pyramidal	84.2169	169.947	189.669
3791	j140630a	1	2	4	positive	pyramidal	unknown	4	5	negative	pyramidal	pyramidal	92.1955	224.2	242.416
3791	j140630a	1	6	4	positive	unknown	pyramidal	4	5	negative	pyramidal	pyramidal	87.5552	166.94	188.507
3791	j140630a	1	7	4	positive	pyramidal	unknown	4	5	negative	pyramidal	pyramidal	1.73923	293.748	293.753
3791	j140630b	1	2	4	positive	pyramidal	unknown	4	5	negative	unknown	pyramidal	130.241	192.072	232.065
3791	j140630b	1	3	4	negative	unknown	pyramidal	5	5	positive	unknown	pyramidal	139.999	263.356	298.255
3791	j140630b	1	6	4	positive	unknown	pyramidal	4	5	negative	unknown	pyramidal	14.4685	127.236	128.056
3791	j140630b	1	7	4	positive	unknown	pyramidal	4	5	negative	unknown	pyramidal	49.919	188.009	194.523
3791	j140630c	1	3	4	negative	pyramidal	unknown	4	5	positive	pyramidal	pyramidal	15.1171	318.28	318.639
3791	j140630c	1	6	4	negative	pyramidal	unknown	4	5	positive	pyramidal	pyramidal	12.3626	299.407	299.662
3793	j140625a	1	6	4	negative	pyramidal	unknown	4	5	positive	pyramidal	pyramidal	23.3971	414.258	414.918
3793	j140625a	1	6	4	negative	pyramidal	unknown	5	5	positive	unknown	pyramidal	31.4384	278.039	279.81
3793	j140625b	1	6A	4	positive	unknown	pyramidal	4	5	negative	pyramidal	pyramidal	60.2235	103.87	120.066
3793	j140625b	1	6B	4	negative	pyramidal	unknown	5	5	positive	pyramidal	pyramidal	26.2319	82.2401	86.3223
3793	j140625b	1	7	4	positive	pyramidal	unknown	4	5	negative	pyramidal	pyramidal	115.259	160.031	197.217
3793	j140625b	1	8	4	positive	pyramidal	unknown	4	5	negative	pyramidal	pyramidal	28.9809	134.969	138.046
3793	j140625c	1	3	4	negative	pyramidal	pyramidal	5	5	positive	pyramidal	pyramidal	47.6035	248.808	253.321
3794	j140627a	1	2	4	positive	pyramidal	unknown	6	5	negative	unknown	pyramidal	34.0898	48.7665	59.5003
3794	j140627a	1	3	4	negative	pyramidal	unknown	4	5	positive	pyramidal	pyramidal	23.8545	257.501	258.603
3794	j140627a	1	7	4	positive	pyramidal	unknown	6	5	negative	unknown	pyramidal	33.0053	4.67891	33.3353
3795	j140629a	1	2	4	positive	pyramidal	unknown	3	5	negative	pyramidal	unknown	6.10295	194.837	194.932
3795	j140629a	1	6	4	negative	pyramidal	unknown	4	5	positive	pyramidal	pyramidal	39.3334	284.146	286.855
3795	j140629a	1	6	4	negative	pyramidal	unknown	5	5	positive	pyramidal	pyramidal	2.90089	289.579	289.593
3795	j140629a	1	7	4	positive	pyramidal	unknown	3	5	negative	pyramidal	unknown	79.6443	172.036	189.577
3798	j140626a	1	3	4	positive	pyramidal	unknown	5	5	negative	pyramidal	pyramidal	64.318	113.151	130.153
3798	j140626a	1	3	4	positive	pyramidal	unknown	6	5	negative	pyramidal	pyramidal	92.1928	99.8112	135.874
3798	j140626a	1	4	4	negative	pyramidal	unknown	7	5	positive	pyramidal	pyramidal	59.321	6.40938	59.6663
3798	j140626b	1	3	4	negative	pyramidal	unknown	4	5	positive	unknown	pyramidal	52.5424	227.811	233.792
3798	j140626b	1	3	4	negative	pyramidal	unknown	5	5	positive	unknown	pyramidal	4.76548	260.635	260.679
4010	j140803a	1	2	4	positive	pyramidal	pyramidal	4	5	negative	pyramidal	pyramidal	17.893	195.124	195.942
4010	j140803a	1	2	4	positive	pyramidal	pyramidal	5	5	negative	pyramidal	pyramidal	23.2506	170.334	171.914
4010	j140803a	1	2	4	positive	pyramidal	pyramidal	6	5	negative	pyramidal	pyramidal	27.9324	95.6648	99.6593
4312	j140911a	1	3	4	positive	pyramidal	unknown	5	5	negative	pyramidal	unknown	42.3703	128.136	134.959
4965	j141216b	1	2	4	positive	pyramidal	unknown	4	5	negative	pyramidal	unknown	58.4942	177.375	186.771
4965	j141216b	1	2	4	positive	pyramidal	unknown	5	5	negative	pyramidal	unknown	9.38452	167.878	168.14
4965	j141216b	1	7	4	positive	pyramidal	pyramidal	4	5	negative	pyramidal	unknown	84.6816	155.349	176.93
4965	j141216b	1	7	4	positive	pyramidal	pyramidal	5	5	negative	pyramidal	unknown	20.936	145.852	147.347
4971	j141219a	1	3	4	negative	pyramidal	pyramidal	5	5	positive	unknown	pyramidal	102.288	127.195	163.222
4971	j141219a	1	6	4	positive	pyramidal	unknown	4	5	negative	pyramidal	pyramidal	71.9367	248.828	259.018
4971	j141219a	1	7	4	positive	pyramidal	unknown	4	5	negative	pyramidal	pyramidal	126.526	324.721	348.5
4971	j141219b	1	2	4	positive	pyramidal	pyramidal	5	5	negative	pyramidal	pyramidal	78.0285	251.352	263.185
4971	j141219b	1	3	4	positive	pyramidal	pyramidal	5	5	negative	pyramidal	pyramidal	83.6954	198.05	215.008
5191	j150114b	1	3	4	negative	pyramidal	unknown	4	5	positive	pyramidal	pyramidal
5308	j150125a	1	2	4	positive	pyramidal	unknown	5	5	negative	pyramidal	unknown	81.9821	135.874	158.691
5308	j150125a	1	3	4	negative	pyramidal	unknown	4	5	positive	pyramidal	pyramidal	23.5543	112.361	114.803
5308	j150125a	1	7	4	negative	pyramidal	stellate	4	5	positive	pyramidal	pyramidal	54.781	139.485	149.856
5308	j150125b	1	2	4	positive	pyramidal	unknown	5	5	negative	pyramidal	unknown	68.6042	219.001	229.495
5308	j150125b	1	2	4	positive	pyramidal	unknown	6A	5	negative	pyramidal	unknown	105.604	210.591	235.586
5308	j150125b	1	2	4	positive	pyramidal	unknown	6B	5	negative	pyramidal	unknown	102.751	238.039	259.268
5308	j150125b	1	7	4	positive	pyramidal	unknown	5	5	negative	pyramidal	unknown	41.1323	262.628	265.829
5308	j150125b	1	7	4	positive	pyramidal	unknown	6A	5	negative	pyramidal	unknown	6.11902	254.217	254.291
5308	j150125b	1	7	4	positive	pyramidal	unknown	6B	5	negative	pyramidal	unknown	8.18052	281.665	281.784
5308	j150125b	1	8	4	negative	pyramidal	pyramidal	3	5	positive	pyramidal	pyramidal	125.024	280.677	307.263
5308	j150125b	1	8	4	negative	pyramidal	pyramidal	4	5	positive	pyramidal	pyramidal	143.676	324.71	355.077
5541	j150224a	1	3	4	negative	pyramidal	stellate	4	5	positive	pyramidal	pyramidal	30.1752	87.8039	92.8443
5818	j150409c	1	3	4	positive	pyramidal	unknown	5	5	negative	pyramidal	pyramidal	139.339	109.547	177.245
6558	j150731b	1	3	4	positive	pyramidal	stellate	5	5	negative	pyramidal	unknown	71.9024	14.6165	73.3729
6558	j150731b	1	6	4	positive	pyramidal	stellate	5	5	negative	pyramidal	unknown	15.909	49.7754	52.2559
11508	j160929a	1	6	4	negative	pyramidal	stellate	4	5	positive	pyramidal	pyramidal	49.8703	139.332	147.988
11509	j160929c	1	6	4	negative	pyramidal	stellate	3	5	positive	pyramidal	pyramidal	38.4498	232.187	235.349
3200	j140508b	1	4	5	positive	pyramidal	pyramidal	2	2/3	positive	pyramidal	pyramidal	11.1168	358.743	358.915
3200	j140508b	1	4	5	positive	pyramidal	pyramidal	8	2/3	positive	pyramidal	unknown	35.8243	396.178	397.794
3207	j140509a	1	3	5	positive	pyramidal	pyramidal	1	2/3	positive	pyramidal	pyramidal	203.061	600.863	634.248
3207	j140509a	1	6	5	positive	pyramidal	unknown	1	2/3	positive	pyramidal	pyramidal	84.3097	477.466	484.853
3207	j140509c	1	3	5	positive	pyramidal	pyramidal	1	2/3	positive	pyramidal	unknown	15.0218	338.353	338.686
3207	j140509c	1	3	5	positive	pyramidal	pyramidal	2	2/3	positive	pyramidal	unknown	11.3711	249.684	249.943
3207	j140509c	1	3	5	positive	pyramidal	pyramidal	8	2/3	positive	pyramidal	unknown	58.8493	310.226	315.758
3207	j140509c	1	5	5	positive	unknown	pyramidal	1	2/3	positive	pyramidal	unknown	39.9487	498.507	500.105
3207	j140509c	1	5	5	positive	unknown	pyramidal	2	2/3	positive	pyramidal	unknown	43.1282	409.838	412.101
3207	j140509c	1	5	5	positive	unknown	pyramidal	8	2/3	positive	pyramidal	unknown	11.3467	470.38	470.517
3207	j140509c	1	6	5	positive	pyramidal	pyramidal	1	2/3	positive	pyramidal	unknown	24.4916	360.149	360.981
3207	j140509c	1	6	5	positive	pyramidal	pyramidal	2	2/3	positive	pyramidal	unknown	27.5681	271.48	272.877
3269	j140207b	1	3	5	positive	pyramidal	pyramidal	1	2/3	positive	pyramidal	pyramidal	2.33601	324.025	324.034
3269	j140207b	1	3	5	positive	pyramidal	pyramidal	8	2/3	positive	pyramidal	pyramidal	161.539	368.886	402.706
3269	j140207b	1	5	5	positive	unknown	pyramidal	1	2/3	positive	pyramidal	pyramidal	100.235	362.539	376.14
3269	j140207b	1	5	5	positive	unknown	pyramidal	8	2/3	positive	pyramidal	pyramidal	60.7078	407.4	411.898
3269	j140207b	1	6	5	positive	pyramidal	unknown	1	2/3	positive	pyramidal	pyramidal	175.518	340.106	382.726
3269	j140207b	1	6	5	positive	pyramidal	unknown	8	2/3	positive	pyramidal	pyramidal	17.3835	384.968	385.36
3269	j140207c	1	2	5	positive	pyramidal	pyramidal	1	2/3	positive	pyramidal	pyramidal	42.182	48.9234	64.5974
3269	j140207c	1	3	5	positive	pyramidal	pyramidal	1	2/3	positive	pyramidal	pyramidal	10.1166	105.265	105.75
3270	j140208a	1	5	5	positive	pyramidal	pyramidal	1	2/3	positive	pyramidal	unknown	19.8537	473.235	473.652
3270	j140208a	1	5	5	positive	pyramidal	pyramidal	2	2/3	positive	pyramidal	pyramidal	25.0381	319.881	320.859
3270	j140208a	1	6	5	positive	pyramidal	pyramidal	1	2/3	positive	pyramidal	unknown	21.4633	354.888	355.536
3270	j140208a	1	6	5	positive	pyramidal	pyramidal	2	2/3	positive	pyramidal	pyramidal	28.615	201.533	203.555
3270	j140208b	1	5	5	positive	pyramidal	pyramidal	1	2/3	positive	pyramidal	pyramidal	145.134	285.663	320.418
3270	j140208b	1	5	5	positive	pyramidal	pyramidal	7	2/3	positive	pyramidal	pyramidal	39.4913	231.105	234.455
3270	j140208c	1	5	5	positive	unknown	pyramidal	1	2/3	positive	pyramidal	pyramidal	119.854	293.533	317.059
3270	j140208c	1	5	5	positive	unknown	pyramidal	2	2/3	positive	pyramidal	unknown	142.368	154.008	209.731
3270	j140208c	1	5	5	positive	unknown	pyramidal	8	2/3	positive	pyramidal	unknown	53.7498	353.462	357.525
3305	j140523a	1	4	5	positive	pyramidal	unknown	1	2/3	positive	pyramidal	unknown	40.1936	695.949	697.109
3784	j140623a	1	7	5	positive	pyramidal	pyramidal	1	2/3	positive	pyramidal	pyramidal	147.961	239.402	281.436
3788	j140624b	1	4	5	positive	pyramidal	pyramidal	1	2/3	positive	pyramidal	pyramidal	24.593	480.538	481.167
3788	j140624b	1	4	5	positive	pyramidal	pyramidal	7	2/3	positive	pyramidal	pyramidal	187.351	365.775	410.964
3788	j140624b	1	5A	5	positive	pyramidal	pyramidal	1	2/3	positive	pyramidal	pyramidal	58.1032	514.507	517.777
3788	j140624b	1	5A	5	positive	pyramidal	pyramidal	7	2/3	positive	pyramidal	pyramidal	111.893	399.743	415.108
3788	j140624b	1	5B	5	positive	pyramidal	pyramidal	1	2/3	positive	pyramidal	pyramidal	47.4202	584.901	586.82
3788	j140624b	1	5B	5	positive	pyramidal	pyramidal	7	2/3	positive	pyramidal	pyramidal	214.994	470.138	516.964
3788	j140624c	1	4	5	positive	pyramidal	pyramidal	1	2/3	positive	pyramidal	unknown	54.4078	450.659	453.931
3788	j140624c	1	5	5	positive	pyramidal	pyramidal	1	2/3	positive	pyramidal	unknown	52.2899	418.802	422.054
3791	j140630a	1	3	5	positive	pyramidal	pyramidal	1	2/3	positive	pyramidal	pyramidal	66.6576	512.895	517.208
3791	j140630a	1	5	5	positive	pyramidal	pyramidal	1	2/3	positive	pyramidal	pyramidal	127.514	464.777	481.952
3791	j140630c	1	4	5	positive	pyramidal	pyramidal	1	2/3	positive	pyramidal	pyramidal	80.5315	496.136	502.629
3793	j140625a	1	4	5	positive	pyramidal	pyramidal	1	2/3	positive	pyramidal	pyramidal	65.451	710.13	713.14
3793	j140625a	1	4	5	positive	pyramidal	pyramidal	7	2/3	positive	pyramidal	pyramidal	17.8213	615.172	615.43
3793	j140625a	1	5	5	positive	unknown	pyramidal	1	2/3	positive	pyramidal	pyramidal	81.6653	573.911	579.692
3793	j140625a	1	5	5	positive	unknown	pyramidal	7	2/3	positive	pyramidal	pyramidal	29.5292	478.953	479.862
3793	j140625b	1	5	5	positive	pyramidal	pyramidal	1	2/3	positive	pyramidal	pyramidal	35.3552	344.024	345.836
3793	j140625b	1	5	5	positive	pyramidal	pyramidal	2	2/3	positive	pyramidal	pyramidal	35.7712	321.733	323.716
3794	j140627a	1	4	5	positive	pyramidal	pyramidal	8	2/3	positive	pyramidal	pyramidal	34.085	337.132	338.85
3798	j140626a	1	7	5	positive	pyramidal	pyramidal	1	2/3	positive	pyramidal	pyramidal	3.72391	328.144	328.165
3798	j140626b	1	4	5	positive	unknown	pyramidal	1	2/3	positive	unknown	pyramidal	9.66367	343.994	344.13
3798	j140626b	1	5	5	positive	unknown	pyramidal	1	2/3	positive	unknown	pyramidal	46.3894	376.819	379.663
4965	j141216a	1	4	5	positive	pyramidal	unknown	3B	2/3	positive	pyramidal	unknown	31.1371	350.672	352.052
4965	j141216a	1	4	5	positive	pyramidal	unknown	6	2/3	positive	pyramidal	unknown	44.9241	372.256	374.957
4965	j141216a	1	4	5	positive	pyramidal	unknown	7	2/3	positive	pyramidal	pyramidal	52.7536	431.177	434.392
4971	j141219a	1	5	5	positive	unknown	pyramidal	2	2/3	positive	pyramidal	unknown	16.1269	450.102	450.391
4971	j141219b	1	4	5	positive	pyramidal	pyramidal	8	2/3	positive	pyramidal	unknown	8.17262	364.603	364.695
5191	j150114b	1	4	5	positive	pyramidal	pyramidal	1	2/3	positive	pyramidal	unknown
5191	j150114b	1	4	5	positive	pyramidal	pyramidal	2	2/3	positive	pyramidal	pyramidal	81.3632	307.186	317.779
5191	j150114c	1	3	5	positive	pyramidal	pyramidal	2	2/3	positive	pyramidal	unknown
5308	j150125a	1	4	5	positive	pyramidal	pyramidal	1	2/3	positive	pyramidal	pyramidal	23.0888	211.412	212.669
5541	j150224a	1	4	5	positive	pyramidal	pyramidal	1	2/3	positive	pyramidal	pyramidal	19.4784	260.013	260.741
5818	j150409b	1	6	5	positive	pyramidal	pyramidal	2	2/3	positive	pyramidal	pyramidal	88.1569	449.342	457.909
5818	j150409c	1	4	5	positive	pyramidal	unknown	1	2/3	positive	pyramidal	pyramidal	42.2275	242.544	246.193
5818	j150409c	1	4	5	positive	pyramidal	unknown	2	2/3	positive	pyramidal	pyramidal	31.4534	100.097	104.923
8780	j160217a	1	3	5	positive	pyramidal	pyramidal	1	2/3	positive	pyramidal	pyramidal	52.6977	421.487	424.769
8780	j160217a	1	3	5	positive	pyramidal	pyramidal	2	2/3	positive	pyramidal	pyramidal	17.0431	393.019	393.388
8780	j160217a	1	5	5	positive	pyramidal	pyramidal	1	2/3	positive	pyramidal	pyramidal	125.552	304.198	329.089
8780	j160217a	1	5	5	positive	pyramidal	pyramidal	2	2/3	positive	pyramidal	pyramidal	60.1764	275.73	282.22
8780	j160217b	1	4	5	positive	pyramidal	pyramidal	1	2/3	positive	pyramidal	pyramidal	1.1723	260.871	260.873
8780	j160217b	1	4	5	positive	pyramidal	pyramidal	8	2/3	positive	pyramidal	pyramidal	74.6494	252.198	263.014
8780	j160217b	1	6	5	positive	pyramidal	pyramidal	1	2/3	positive	pyramidal	pyramidal	17.2146	268.697	269.248
8780	j160217b	1	6	5	positive	pyramidal	pyramidal	8	2/3	positive	pyramidal	pyramidal	56.495	260.024	266.091
11508	j160929a	1	4	5	positive	pyramidal	pyramidal	7	2/3	positive	pyramidal	pyramidal	15.7218	241.788	242.299
11509	j160929c	1	3	5	positive	pyramidal	pyramidal	2	2/3	positive	pyramidal	pyramidal	47.6088	330.297	333.71
3200	j140508a	1	5A	5	negative	pyramidal	unknown	1	2/3	positive	pyramidal	pyramidal	41.8355	264.043	267.337
3200	j140508a	1	5A	5	negative	pyramidal	unknown	2	2/3	positive	pyramidal	pyramidal	80.8624	206.71	221.963
3200	j140508a	1	5B	5	negative	unknown	pyramidal	1	2/3	positive	pyramidal	pyramidal	61.6366	285.435	292.015
3200	j140508a	1	5B	5	negative	unknown	pyramidal	2	2/3	positive	pyramidal	pyramidal	101.912	228.102	249.833
3200	j140508b	1	4	5	positive	pyramidal	pyramidal	1	2/3	negative	pyramidal	unknown	6.06791	433.253	433.296
3200	j140508b	1	4	5	positive	pyramidal	pyramidal	7	2/3	negative	pyramidal	unknown	29.2288	349.819	351.038
3200	j140508b	1	5	5	negative	pyramidal	pyramidal	2	2/3	positive	pyramidal	pyramidal	38.6141	384.277	386.212
3200	j140508b	1	5	5	negative	pyramidal	pyramidal	8	2/3	positive	pyramidal	unknown	4.38347	421.711	421.734
3207	j140509a	1	3	5	positive	pyramidal	pyramidal	8B	2/3	negative	pyramidal	unknown	174.239	551.41	578.284
3207	j140509a	1	4	5	negative	pyramidal	pyramidal	1	2/3	positive	pyramidal	pyramidal	148.501	609.73	627.553
3207	j140509a	1	5B	5	negative	unknown	pyramidal	1	2/3	positive	pyramidal	pyramidal	119.727	482.317	496.955
3207	j140509a	1	6	5	positive	pyramidal	unknown	8B	2/3	negative	pyramidal	unknown	60.4518	428.014	432.262
3207	j140509c	1	3	5	positive	pyramidal	pyramidal	7	2/3	negative	unknown	pyramidal	55.4395	187.444	195.471
3207	j140509c	1	4B	5	negative	pyramidal	pyramidal	2	2/3	positive	pyramidal	unknown	28.299	361.809	362.914
3207	j140509c	1	5	5	positive	unknown	pyramidal	7	2/3	negative	unknown	pyramidal	4.07946	347.598	347.622
3207	j140509c	1	6	5	positive	pyramidal	pyramidal	7	2/3	negative	unknown	pyramidal	16.8823	209.241	209.921
3269	j140207c	1	2	5	positive	pyramidal	pyramidal	7B	2/3	negative	pyramidal	unknown	55.0927	62.6841	83.4536
3269	j140207c	1	3	5	positive	pyramidal	pyramidal	7B	2/3	negative	pyramidal	unknown	107.135	119.026	160.141
3269	j140207c	1	4B	5	negative	unknown	pyramidal	1	2/3	positive	pyramidal	pyramidal	11.5105	123.188	123.725
3269	j140207c	1	5	5	negative	unknown	pyramidal	1	2/3	positive	pyramidal	pyramidal	39.9695	124.405	130.668
3269	j140207c	1	6	5	negative	pyramidal	unknown	1	2/3	positive	pyramidal	pyramidal	60.076	53.2502	80.2789
3270	j140208a	1	4	5	negative	pyramidal	pyramidal	1	2/3	positive	pyramidal	unknown	75.4322	479.222	485.122
3270	j140208a	1	4	5	negative	pyramidal	pyramidal	2	2/3	positive	pyramidal	pyramidal	69.138	325.867	333.121
3270	j140208a	1	5	5	positive	pyramidal	pyramidal	8	2/3	negative	pyramidal	unknown	81.9019	399.082	407.399
3270	j140208a	1	6	5	positive	pyramidal	pyramidal	8	2/3	negative	pyramidal	unknown	63.9124	280.734	287.918
3270	j140208b	1	4B	5	negative	pyramidal	unknown	1	2/3	positive	pyramidal	pyramidal	76.02	288.078	297.94
3270	j140208b	1	4B	5	negative	pyramidal	unknown	7	2/3	positive	pyramidal	pyramidal	29.6481	233.52	235.395
3270	j140208b	1	5	5	positive	pyramidal	pyramidal	2	2/3	negative	pyramidal	pyramidal	119.319	232.898	261.684
3270	j140208b	1	5	5	positive	pyramidal	pyramidal	8	2/3	negative	pyramidal	pyramidal	54.2547	266.077	271.553
3270	j140208c	1	4	5	negative	pyramidal	pyramidal	1	2/3	positive	pyramidal	pyramidal	112.659	368.226	385.075
3270	j140208c	1	4	5	negative	pyramidal	pyramidal	2	2/3	positive	pyramidal	unknown	135.219	228.701	265.684
3270	j140208c	1	4	5	negative	pyramidal	pyramidal	8	2/3	positive	pyramidal	unknown	48.7553	428.155	430.922
3270	j140208c	1	5	5	positive	unknown	pyramidal	7	2/3	negative	pyramidal	unknown	118.919	184.94	219.874
3305	j140523a	1	4	5	positive	pyramidal	unknown	7	2/3	negative	pyramidal	pyramidal	125.476	574.432	587.976
3305	j140523a	1	4	5	positive	pyramidal	unknown	8	2/3	negative	pyramidal	unknown	116.793	661.946	672.171
3305	j140523a	1	5	5	negative	pyramidal	unknown	1	2/3	positive	pyramidal	unknown	33.7567	595.452	596.408
3784	j140623a	1	3	5	negative	pyramidal	pyramidal	1	2/3	positive	pyramidal	pyramidal	69.954	310.738	318.515
3784	j140623a	1	4	5	negative	pyramidal	pyramidal	1	2/3	positive	pyramidal	pyramidal	141.009	366.539	392.727
3784	j140623a	1	6	5	negative	pyramidal	pyramidal	1	2/3	positive	pyramidal	pyramidal	154.189	304.334	341.165
3784	j140623a	1	7	5	positive	pyramidal	pyramidal	8	2/3	negative	pyramidal	pyramidal	36.0336	237.426	240.145
3784	j140623b	1	4	5	positive	pyramidal	pyramidal	1	2/3	negative	pyramidal	unknown	7.37223	334.7	334.781
3784	j140623c	1	5	5	positive	pyramidal	pyramidal	8	2/3	negative	unknown	pyramidal	61.3036	283.784	290.33
3788	j140624a	1	5	5	negative	pyramidal	unknown	1	2/3	positive	pyramidal	pyramidal	174.104	374.581	413.065
3788	j140624b	1	4	5	positive	pyramidal	pyramidal	8	2/3	negative	pyramidal	pyramidal	88.0988	444.27	452.92
3788	j140624b	1	5A	5	positive	pyramidal	pyramidal	8	2/3	negative	pyramidal	pyramidal	15.5237	478.238	478.49
3788	j140624b	1	5B	5	positive	pyramidal	pyramidal	8	2/3	negative	pyramidal	pyramidal	115.385	548.633	560.635
3788	j140624b	1	5C	5	negative	pyramidal	unknown	1	2/3	positive	pyramidal	pyramidal	40.5442	633.047	634.344
3788	j140624b	1	5C	5	negative	pyramidal	unknown	7	2/3	positive	pyramidal	pyramidal	133.785	518.283	535.272
3788	j140624c	1	4	5	positive	pyramidal	pyramidal	7	2/3	negative	pyramidal	unknown	58.8965	362.926	367.674
3788	j140624c	1	5	5	positive	pyramidal	pyramidal	7	2/3	negative	pyramidal	unknown	58.0965	331.07	336.128
3791	j140630a	1	3	5	positive	pyramidal	pyramidal	8	2/3	negative	pyramidal	pyramidal	42.3531	469.843	471.748
3791	j140630a	1	4	5	negative	pyramidal	pyramidal	1	2/3	positive	pyramidal	pyramidal	77.6897	516.169	521.983
3791	j140630a	1	5	5	positive	pyramidal	pyramidal	8	2/3	negative	pyramidal	pyramidal	103.624	421.725	434.27
3791	j140630b	1	5	5	positive	unknown	pyramidal	8	2/3	negative	unknown	pyramidal	111.721	611.104	621.233
3791	j140630c	1	4	5	positive	pyramidal	pyramidal	8	2/3	negative	pyramidal	pyramidal	25.7586	547.271	547.877
3793	j140625a	1	4	5	positive	pyramidal	pyramidal	8	2/3	negative	pyramidal	pyramidal	11.7525	687.856	687.956
3793	j140625a	1	5	5	positive	unknown	pyramidal	8	2/3	negative	pyramidal	pyramidal	25.2383	551.637	552.214
3793	j140625b	1	4	5	negative	pyramidal	pyramidal	1	2/3	positive	pyramidal	pyramidal	37.595	376.735	378.606
3793	j140625b	1	4	5	negative	pyramidal	pyramidal	2	2/3	positive	pyramidal	pyramidal	37.328	354.444	356.404
3793	j140625b	1	5	5	positive	pyramidal	pyramidal	3	2/3	negative	pyramidal	pyramidal	55.8197	287.98	293.34
3793	j140625c	1	5	5	positive	pyramidal	pyramidal	8	2/3	negative	pyramidal	pyramidal	52.9437	464.109	467.119
3794	j140627a	1	4	5	positive	pyramidal	pyramidal	1	2/3	negative	pyramidal	unknown	68.0025	328.237	335.207
3794	j140627a	1	6	5	negative	unknown	pyramidal	8	2/3	positive	pyramidal	pyramidal	35.5864	119.689	124.867
3794	j140627b	1	4	5	negative	pyramidal	unknown	1	2/3	positive	pyramidal	pyramidal	9.56023	233.615	233.81
3795	j140629a	1	4	5	positive	pyramidal	pyramidal	8	2/3	negative	pyramidal	pyramidal	30.7857	470.546	471.552
3795	j140629a	1	5	5	positive	pyramidal	pyramidal	8	2/3	negative	pyramidal	pyramidal	15.5475	475.979	476.233
3798	j140626a	1	5	5	negative	pyramidal	pyramidal	1	2/3	positive	pyramidal	pyramidal	12.227	375.73	375.928
3798	j140626a	1	6	5	negative	pyramidal	pyramidal	1	2/3	positive	pyramidal	pyramidal	15.7331	362.39	362.732
3798	j140626a	1	7	5	positive	pyramidal	pyramidal	2	2/3	negative	pyramidal	unknown	5.02886	299.319	299.361
3798	j140626a	1	7	5	positive	pyramidal	pyramidal	8	2/3	negative	pyramidal	unknown	38.9046	296.671	299.211
3798	j140626b	1	4	5	positive	unknown	pyramidal	2	2/3	negative	pyramidal	unknown	57.2309	332.733	337.619
3798	j140626b	1	4	5	positive	unknown	pyramidal	8	2/3	negative	unknown	pyramidal	87.21	317.262	329.03
3798	j140626b	1	5	5	positive	unknown	pyramidal	2	2/3	negative	pyramidal	unknown	6.5677	365.557	365.616
3798	j140626b	1	5	5	positive	unknown	pyramidal	8	2/3	negative	unknown	pyramidal	32.9234	350.086	351.631
4010	j140803a	1	4	5	negative	pyramidal	pyramidal	1	2/3	positive	pyramidal	pyramidal	33.121	340.477	342.084
4010	j140803a	1	5	5	negative	pyramidal	pyramidal	1	2/3	positive	pyramidal	pyramidal	40.2677	315.687	318.245
4010	j140803a	1	6	5	negative	pyramidal	pyramidal	1	2/3	positive	pyramidal	pyramidal	47.6697	241.018	245.687
4312	j140911a	1	5	5	negative	pyramidal	unknown	1	2/3	positive	pyramidal	pyramidal	27.8641	327.253	328.438
4312	j140911a	1	5	5	negative	pyramidal	unknown	2	2/3	positive	pyramidal	pyramidal	12.1614	234.416	234.731
4312	j140911b	1	2	5	positive	pyramidal	unknown	7	2/3	negative	pyramidal	pyramidal	86.1403	87.9799	123.128
4312	j140911b	1	6	5	positive	pyramidal	unknown	7	2/3	negative	pyramidal	pyramidal	59.2059	132.823	145.421
4965	j141216a	1	4	5	positive	pyramidal	unknown	1	2/3	negative	pyramidal	pyramidal	25.1437	503.012	503.64
4965	j141216a	1	4	5	positive	pyramidal	unknown	2	2/3	negative	pyramidal	pyramidal	106.974	420.655	434.043
4965	j141216a	1	4	5	positive	pyramidal	unknown	3A	2/3	negative	pyramidal	unknown	34.711	361.678	363.339
4965	j141216a	1	4	5	positive	pyramidal	unknown	8	2/3	negative	pyramidal	pyramidal	52.7365	490.076	492.905
4965	j141216a	1	5B	5	negative	pyramidal	pyramidal	3B	2/3	positive	pyramidal	unknown	87.9574	385.3	395.212
4965	j141216a	1	5B	5	negative	pyramidal	pyramidal	6	2/3	positive	pyramidal	unknown	57.2717	406.883	410.894
4965	j141216a	1	5B	5	negative	pyramidal	pyramidal	7	2/3	positive	pyramidal	pyramidal	51.9025	465.804	468.687
4971	j141219a	1	4	5	negative	pyramidal	pyramidal	2	2/3	positive	pyramidal	unknown	62.4487	580.764	584.112
4971	j141219a	1	5	5	positive	unknown	pyramidal	1	2/3	negative	pyramidal	unknown	13.0586	460.474	460.66
4971	j141219a	1	5	5	positive	unknown	pyramidal	8	2/3	negative	pyramidal	unknown	28.1265	463.886	464.738
4971	j141219b	1	4	5	positive	pyramidal	pyramidal	7A	2/3	negative	pyramidal	unknown	25.9333	398.098	398.941
4971	j141219b	1	5	5	negative	pyramidal	pyramidal	1B	2/3	positive	pyramidal	pyramidal	91.3422	323.65	336.293
4971	j141219b	1	5	5	negative	pyramidal	pyramidal	8	2/3	positive	pyramidal	unknown	74.4928	360.475	368.091
5191	j150114b	1	4	5	positive	pyramidal	pyramidal	7	2/3	negative	pyramidal	pyramidal	58.0915	361.606	366.242
5191	j150114b	1	4	5	positive	pyramidal	pyramidal	8	2/3	negative	pyramidal	unknown
5191	j150114b	1	5	5	negative	pyramidal	pyramidal	1	2/3	positive	pyramidal	unknown
5191	j150114b	1	5	5	negative	pyramidal	pyramidal	2	2/3	positive	pyramidal	pyramidal	103.84	328.769	344.778
5191	j150114b	1	6	5	negative	pyramidal	pyramidal	1	2/3	positive	pyramidal	unknown
5191	j150114b	1	6	5	negative	pyramidal	pyramidal	2	2/3	positive	pyramidal	pyramidal	88.3221	242.263	257.861
5191	j150114c	1	3	5	positive	pyramidal	pyramidal	1	2/3	negative	pyramidal	unknown
5191	j150114c	1	3	5	positive	pyramidal	pyramidal	7	2/3	negative	pyramidal	unknown
5191	j150114c	1	4	5	negative	pyramidal	pyramidal	2	2/3	positive	pyramidal	unknown
5308	j150125a	1	4	5	positive	pyramidal	pyramidal	8	2/3	negative	pyramidal	unknown	136.019	263.333	296.387
5308	j150125a	1	5	5	negative	pyramidal	unknown	1	2/3	positive	pyramidal	pyramidal	62.0267	229.793	238.017
5541	j150224a	1	4	5	positive	pyramidal	pyramidal	8	2/3	negative	pyramidal	unknown	98.9235	240.247	259.817
5541	j150224a	1	5	5	negative	pyramidal	pyramidal	1	2/3	positive	pyramidal	pyramidal	76.9491	275.384	285.933
5541	j150224a	1	6	5	negative	pyramidal	pyramidal	1	2/3	positive	pyramidal	pyramidal	69.1697	221.275	231.834
5818	j150409c	1	5	5	negative	pyramidal	pyramidal	1	2/3	positive	pyramidal	pyramidal	65.1889	280.736	288.206
5818	j150409c	1	5	5	negative	pyramidal	pyramidal	2	2/3	positive	pyramidal	pyramidal	91.3832	138.289	165.755
6558	j150731b	1	5	5	negative	pyramidal	unknown	2	2/3	positive	pyramidal	pyramidal	56.9895	361.95	366.409
6558	j150731b	1	5	5	negative	pyramidal	unknown	8	2/3	positive	pyramidal	pyramidal	41.4579	388.5	390.706
8780	j160217a	1	3	5	positive	pyramidal	pyramidal	6	2/3	negative	pyramidal	pyramidal	9.58936	351.335	351.466
8780	j160217a	1	4	5	negative	pyramidal	pyramidal	1	2/3	positive	pyramidal	pyramidal	130.568	384.599	406.159
8780	j160217a	1	4	5	negative	pyramidal	pyramidal	2	2/3	positive	pyramidal	pyramidal	65.075	356.131	362.028
8780	j160217a	1	5	5	positive	pyramidal	pyramidal	6	2/3	negative	pyramidal	pyramidal	64.038	234.046	242.648
8780	j160217b	1	5	5	negative	pyramidal	pyramidal	1	2/3	positive	pyramidal	pyramidal	12.8053	291.181	291.463
8780	j160217b	1	5	5	negative	pyramidal	pyramidal	8	2/3	positive	pyramidal	pyramidal	64.1799	282.508	289.707
3200	j140508b	1	4	5	positive	pyramidal	pyramidal	6	4	positive	pyramidal	pyramidal	41.118	157.78	163.05
3207	j140509a	1	3	5	positive	pyramidal	pyramidal	7	4	positive	pyramidal	unknown	214.161	455.299	503.152
3207	j140509a	1	6	5	positive	pyramidal	unknown	7	4	positive	pyramidal	unknown	95.0944	331.903	345.257
3269	j140207b	1	3	5	positive	pyramidal	pyramidal	2	4	positive	pyramidal	pyramidal	71.7306	102.028	124.72
3269	j140207b	1	3	5	positive	pyramidal	pyramidal	7	4	positive	pyramidal	pyramidal	123.886	110.492	166.001
3269	j140207b	1	5	5	positive	unknown	pyramidal	2	4	positive	pyramidal	pyramidal	29.1611	140.541	143.535
3269	j140207b	1	5	5	positive	unknown	pyramidal	7	4	positive	pyramidal	pyramidal	22.996	149.006	150.77
3269	j140207b	1	6	5	positive	pyramidal	unknown	2	4	positive	pyramidal	pyramidal	104.456	118.109	157.673
3269	j140207b	1	6	5	positive	pyramidal	unknown	7	4	positive	pyramidal	pyramidal	52.5147	126.574	137.035
3270	j140208a	1	5	5	positive	pyramidal	pyramidal	7	4	positive	pyramidal	unknown	18.5218	229.099	229.847
3270	j140208a	1	6	5	positive	pyramidal	pyramidal	7	4	positive	pyramidal	unknown	2.79585	110.752	110.787
3270	j140208b	1	5	5	positive	pyramidal	pyramidal	3A	4	positive	pyramidal	pyramidal	56.5444	117.029	129.973
3270	j140208b	1	5	5	positive	pyramidal	pyramidal	6	4	positive	pyramidal	pyramidal	6.20882	120.656	120.816
3270	j140208c	1	5	5	positive	unknown	pyramidal	3	4	positive	pyramidal	pyramidal	113.865	63.1298	130.195
3305	j140523a	1	4	5	positive	pyramidal	unknown	3	4	positive	pyramidal	unknown	50.5316	339.046	342.791
3305	j140523a	1	4	5	positive	pyramidal	unknown	6	4	positive	pyramidal	unknown	69.4271	420.714	426.404
3784	j140623b	1	4	5	positive	pyramidal	pyramidal	7	4	positive	pyramidal	pyramidal	35.0078	160.411	164.186
3788	j140624b	1	4	5	positive	pyramidal	pyramidal	2	4	positive	pyramidal	unknown	61.3877	279.228	285.897
3788	j140624b	1	5A	5	positive	pyramidal	pyramidal	2	4	positive	pyramidal	unknown	17.533	313.197	313.688
3788	j140624b	1	5B	5	positive	pyramidal	pyramidal	2	4	positive	pyramidal	unknown	88.5588	383.592	393.682
3788	j140624c	1	4	5	positive	pyramidal	pyramidal	2	4	positive	pyramidal	unknown	55.6034	241.724	248.037
3788	j140624c	1	4	5	positive	pyramidal	pyramidal	3	4	positive	pyramidal	unknown	50.0893	184.227	190.915
3788	j140624c	1	5	5	positive	pyramidal	pyramidal	2	4	positive	pyramidal	unknown	55.1462	209.867	216.992
3788	j140624c	1	5	5	positive	pyramidal	pyramidal	3	4	positive	pyramidal	unknown	49.6812	152.371	160.266
3791	j140630a	1	3	5	positive	pyramidal	pyramidal	2	4	positive	pyramidal	unknown	80.5229	220.925	235.142
3791	j140630a	1	3	5	positive	pyramidal	pyramidal	6	4	positive	unknown	pyramidal	75.8956	163.665	180.406
3791	j140630a	1	3	5	positive	pyramidal	pyramidal	7	4	positive	pyramidal	unknown	13.5625	290.473	290.789
3791	j140630a	1	5	5	positive	pyramidal	pyramidal	2	4	positive	pyramidal	unknown	142.024	172.808	223.681
3791	j140630a	1	5	5	positive	pyramidal	pyramidal	6	4	positive	unknown	pyramidal	137.385	115.548	179.516
3791	j140630a	1	5	5	positive	pyramidal	pyramidal	7	4	positive	pyramidal	unknown	48.5065	242.356	247.162
3791	j140630b	1	5	5	positive	unknown	pyramidal	2	4	positive	pyramidal	unknown	154.115	327.576	362.018
3791	j140630b	1	5	5	positive	unknown	pyramidal	6	4	positive	unknown	pyramidal	38.9323	262.74	265.609
3791	j140630b	1	5	5	positive	unknown	pyramidal	7	4	positive	unknown	pyramidal	74.7653	323.513	332.039
3791	j140630c	1	4	5	positive	pyramidal	pyramidal	2	4	positive	pyramidal	pyramidal	70.1056	355.46	362.307
3791	j140630c	1	4	5	positive	pyramidal	pyramidal	7	4	positive	unknown	pyramidal	57.3273	305.334	310.669
3793	j140625a	1	4	5	positive	pyramidal	pyramidal	3	4	positive	unknown	pyramidal	41.8125	404.252	406.408
3793	j140625a	1	5	5	positive	unknown	pyramidal	3	4	positive	unknown	pyramidal	57.9951	268.033	274.235
3793	j140625b	1	5	5	positive	pyramidal	pyramidal	6A	4	positive	unknown	pyramidal	58.1927	71.1589	91.9238
3793	j140625b	1	5	5	positive	pyramidal	pyramidal	7	4	positive	pyramidal	unknown	112.996	127.32	170.231
3793	j140625b	1	5	5	positive	pyramidal	pyramidal	8	4	positive	pyramidal	unknown	27.4541	102.259	105.88
3794	j140627a	1	4	5	positive	pyramidal	pyramidal	2	4	positive	pyramidal	unknown	32.5556	266.21	268.193
3794	j140627a	1	4	5	positive	pyramidal	pyramidal	7	4	positive	pyramidal	unknown	32.9649	222.122	224.555
3795	j140629a	1	4	5	positive	pyramidal	pyramidal	2	4	positive	pyramidal	unknown	7.00419	283.596	283.682
3795	j140629a	1	4	5	positive	pyramidal	pyramidal	7	4	positive	pyramidal	unknown	81.208	260.795	273.146
3795	j140629a	1	5	5	positive	pyramidal	pyramidal	2	4	positive	pyramidal	unknown	32.1898	289.029	290.816
3795	j140629a	1	5	5	positive	pyramidal	pyramidal	7	4	positive	pyramidal	unknown	44.2173	266.228	269.875
3798	j140626a	1	7	5	positive	pyramidal	pyramidal	3	4	positive	pyramidal	unknown	72.7658	65.565	97.9471
3798	j140626b	1	4	5	positive	unknown	pyramidal	6	4	positive	pyramidal	unknown	17.2459	217.707	218.389
3798	j140626b	1	4	5	positive	unknown	pyramidal	7	4	positive	pyramidal	unknown	68.6556	218.398	228.936
3798	j140626b	1	5	5	positive	unknown	pyramidal	6	4	positive	pyramidal	unknown	38.6182	250.531	253.49
3798	j140626b	1	5	5	positive	unknown	pyramidal	7	4	positive	pyramidal	unknown	14.3582	251.223	251.633
4971	j141219a	1	5	5	positive	unknown	pyramidal	6	4	positive	pyramidal	unknown	6.07723	118.166	118.322
4971	j141219a	1	5	5	positive	unknown	pyramidal	7	4	positive	pyramidal	unknown	50.4404	194.058	200.507
4971	j141219b	1	4	5	positive	pyramidal	pyramidal	2	4	positive	pyramidal	pyramidal	7.31995	255.48	255.585
4971	j141219b	1	4	5	positive	pyramidal	pyramidal	3	4	positive	pyramidal	pyramidal	12.8648	202.178	202.587
5308	j150125a	1	4	5	positive	pyramidal	pyramidal	2	4	positive	pyramidal	unknown	5.27439	117.494	117.612
5308	j150125b	1	3	5	positive	pyramidal	pyramidal	2	4	positive	pyramidal	unknown	66.1186	281.73	289.384
5308	j150125b	1	3	5	positive	pyramidal	pyramidal	7	4	positive	pyramidal	unknown	47.3853	325.356	328.788
5308	j150125b	1	4	5	positive	pyramidal	pyramidal	2	4	positive	pyramidal	unknown	45.1327	325.763	328.874
5308	j150125b	1	4	5	positive	pyramidal	pyramidal	7	4	positive	pyramidal	unknown	64.8865	369.389	375.044
5818	j150409c	1	4	5	positive	pyramidal	unknown	3	4	positive	pyramidal	unknown	41.2446	71.3546	82.4173
11508	j160929a	1	4	5	positive	pyramidal	pyramidal	3	4	positive	pyramidal	unknown	19.5972	102.284	104.145
3200	j140508a	1	5A	5	negative	pyramidal	unknown	3	4	positive	pyramidal	unknown	77.1821	81.7444	112.424
3200	j140508a	1	5A	5	negative	pyramidal	unknown	7	4	positive	pyramidal	unknown	22.1583	169.533	170.974
3200	j140508a	1	5B	5	negative	unknown	pyramidal	7	4	positive	pyramidal	unknown	42.6338	190.924	195.627
3200	j140508b	1	4	5	positive	pyramidal	pyramidal	3	4	negative	pyramidal	pyramidal	24.4059	156.077	157.973
3200	j140508b	1	5	5	negative	pyramidal	pyramidal	6	4	positive	pyramidal	pyramidal	6.32008	183.314	183.422
3207	j140509a	1	3	5	positive	pyramidal	pyramidal	2	4	negative	pyramidal	pyramidal	113.576	395.603	411.584
3207	j140509a	1	4	5	negative	pyramidal	pyramidal	7	4	positive	pyramidal	unknown	159.619	464.166	490.844
3207	j140509a	1	5B	5	negative	unknown	pyramidal	7	4	positive	pyramidal	unknown	130.731	336.753	361.238
3207	j140509a	1	6	5	positive	pyramidal	unknown	2	4	negative	pyramidal	pyramidal	14.4916	272.206	272.592
3270	j140208a	1	4	5	negative	pyramidal	pyramidal	7	4	positive	pyramidal	unknown	93.3345	235.085	252.936
3270	j140208a	1	5	5	positive	pyramidal	pyramidal	3	4	negative	pyramidal	pyramidal	23.9653	198.244	199.688
3270	j140208a	1	6	5	positive	pyramidal	pyramidal	3	4	negative	pyramidal	pyramidal	26.3459	79.8967	84.1284
3270	j140208b	1	4B	5	negative	pyramidal	unknown	6	4	positive	pyramidal	pyramidal	63.3753	123.071	138.43
3270	j140208b	1	5	5	positive	pyramidal	pyramidal	3B	4	negative	pyramidal	unknown	54.667	85.1741	101.208
3270	j140208c	1	4	5	negative	pyramidal	pyramidal	3	4	positive	pyramidal	pyramidal	106.858	137.823	174.396
3270	j140208c	1	5	5	positive	unknown	pyramidal	6B	4	negative	pyramidal	pyramidal	54.0038	121.704	133.148
3305	j140523a	1	4	5	positive	pyramidal	unknown	2A	4	negative	pyramidal	unknown	31.2905	404.265	405.474
3305	j140523a	1	5	5	negative	pyramidal	unknown	2B	4	positive	pyramidal	unknown	7.27072	247.847	247.954
3305	j140523a	1	5	5	negative	pyramidal	unknown	3	4	positive	pyramidal	unknown	40.6256	238.549	241.984
3305	j140523a	1	5	5	negative	pyramidal	unknown	6	4	positive	pyramidal	unknown	58.3354	320.217	325.488
3784	j140623b	1	4	5	positive	pyramidal	pyramidal	3	4	negative	unknown	pyramidal	42.2376	100.652	109.155
3784	j140623b	1	5	5	negative	pyramidal	pyramidal	7	4	positive	pyramidal	pyramidal	13.5891	263.031	263.382
3784	j140623c	1	5	5	positive	pyramidal	pyramidal	7	4	negative	unknown	pyramidal	84.2371	207.027	223.509
3788	j140624a	1	5	5	negative	pyramidal	unknown	6	4	positive	pyramidal	unknown	89.0599	134.546	161.351
3788	j140624b	1	4	5	positive	pyramidal	pyramidal	3	4	negative	pyramidal	pyramidal	49.7451	236.103	241.287
3788	j140624b	1	4	5	positive	pyramidal	pyramidal	6	4	negative	pyramidal	pyramidal	119.588	211.931	243.343
3788	j140624b	1	5A	5	positive	pyramidal	pyramidal	3	4	negative	pyramidal	pyramidal	26.2315	270.072	271.343
3788	j140624b	1	5A	5	positive	pyramidal	pyramidal	6	4	negative	pyramidal	pyramidal	44.0276	245.9	249.81
3788	j140624b	1	5B	5	positive	pyramidal	pyramidal	3	4	negative	pyramidal	pyramidal	77.8744	340.467	349.259
3788	j140624b	1	5B	5	positive	pyramidal	pyramidal	6	4	negative	pyramidal	pyramidal	147.694	316.294	349.078
3788	j140624b	1	5C	5	negative	pyramidal	unknown	2	4	positive	pyramidal	unknown	16.5051	431.737	432.053
3788	j140624c	1	4	5	positive	pyramidal	pyramidal	6B	4	negative	pyramidal	unknown	84.6529	201.803	218.839
3791	j140630a	1	4	5	negative	pyramidal	pyramidal	2	4	positive	pyramidal	unknown	92.1955	224.2	242.416
3791	j140630a	1	4	5	negative	pyramidal	pyramidal	6	4	positive	unknown	pyramidal	87.5552	166.94	188.507
3791	j140630a	1	4	5	negative	pyramidal	pyramidal	7	4	positive	pyramidal	unknown	1.73923	293.748	293.753
3791	j140630b	1	4	5	negative	unknown	pyramidal	2	4	positive	pyramidal	unknown	130.241	192.072	232.065
3791	j140630b	1	4	5	negative	unknown	pyramidal	6	4	positive	unknown	pyramidal	14.4685	127.236	128.056
3791	j140630b	1	4	5	negative	unknown	pyramidal	7	4	positive	unknown	pyramidal	49.919	188.009	194.523
3791	j140630b	1	5	5	positive	unknown	pyramidal	3	4	negative	unknown	pyramidal	139.999	263.356	298.255
3791	j140630c	1	4	5	positive	pyramidal	pyramidal	3	4	negative	pyramidal	unknown	15.1171	318.28	318.639
3791	j140630c	1	4	5	positive	pyramidal	pyramidal	6	4	negative	pyramidal	unknown	12.3626	299.407	299.662
3793	j140625a	1	4	5	positive	pyramidal	pyramidal	6	4	negative	pyramidal	unknown	23.3971	414.258	414.918
3793	j140625a	1	5	5	positive	unknown	pyramidal	6	4	negative	pyramidal	unknown	31.4384	278.039	279.81
3793	j140625b	1	4	5	negative	pyramidal	pyramidal	6A	4	positive	unknown	pyramidal	60.2235	103.87	120.066
3793	j140625b	1	4	5	negative	pyramidal	pyramidal	7	4	positive	pyramidal	unknown	115.259	160.031	197.217
3793	j140625b	1	4	5	negative	pyramidal	pyramidal	8	4	positive	pyramidal	unknown	28.9809	134.969	138.046
3793	j140625b	1	5	5	positive	pyramidal	pyramidal	6B	4	negative	pyramidal	unknown	26.2319	82.2401	86.3223
3793	j140625c	1	5	5	positive	pyramidal	pyramidal	3	4	negative	pyramidal	pyramidal	47.6035	248.808	253.321
3794	j140627a	1	4	5	positive	pyramidal	pyramidal	3	4	negative	pyramidal	unknown	23.8545	257.501	258.603
3794	j140627a	1	6	5	negative	unknown	pyramidal	2	4	positive	pyramidal	unknown	34.0898	48.7665	59.5003
3794	j140627a	1	6	5	negative	unknown	pyramidal	7	4	positive	pyramidal	unknown	33.0053	4.67891	33.3353
3795	j140629a	1	3	5	negative	pyramidal	unknown	2	4	positive	pyramidal	unknown	6.10295	194.837	194.932
3795	j140629a	1	3	5	negative	pyramidal	unknown	7	4	positive	pyramidal	unknown	79.6443	172.036	189.577
3795	j140629a	1	4	5	positive	pyramidal	pyramidal	6	4	negative	pyramidal	unknown	39.3334	284.146	286.855
3795	j140629a	1	5	5	positive	pyramidal	pyramidal	6	4	negative	pyramidal	unknown	2.90089	289.579	289.593
3798	j140626a	1	5	5	negative	pyramidal	pyramidal	3	4	positive	pyramidal	unknown	64.318	113.151	130.153
3798	j140626a	1	6	5	negative	pyramidal	pyramidal	3	4	positive	pyramidal	unknown	92.1928	99.8112	135.874
3798	j140626a	1	7	5	positive	pyramidal	pyramidal	4	4	negative	pyramidal	unknown	59.321	6.40938	59.6663
3798	j140626b	1	4	5	positive	unknown	pyramidal	3	4	negative	pyramidal	unknown	52.5424	227.811	233.792
3798	j140626b	1	5	5	positive	unknown	pyramidal	3	4	negative	pyramidal	unknown	4.76548	260.635	260.679
4010	j140803a	1	4	5	negative	pyramidal	pyramidal	2	4	positive	pyramidal	pyramidal	17.893	195.124	195.942
4010	j140803a	1	5	5	negative	pyramidal	pyramidal	2	4	positive	pyramidal	pyramidal	23.2506	170.334	171.914
4010	j140803a	1	6	5	negative	pyramidal	pyramidal	2	4	positive	pyramidal	pyramidal	27.9324	95.6648	99.6593
4312	j140911a	1	5	5	negative	pyramidal	unknown	3	4	positive	pyramidal	unknown	42.3703	128.136	134.959
4965	j141216b	1	4	5	negative	pyramidal	unknown	2	4	positive	pyramidal	unknown	58.4942	177.375	186.771
4965	j141216b	1	4	5	negative	pyramidal	unknown	7	4	positive	pyramidal	pyramidal	84.6816	155.349	176.93
4965	j141216b	1	5	5	negative	pyramidal	unknown	2	4	positive	pyramidal	unknown	9.38452	167.878	168.14
4965	j141216b	1	5	5	negative	pyramidal	unknown	7	4	positive	pyramidal	pyramidal	20.936	145.852	147.347
4971	j141219a	1	4	5	negative	pyramidal	pyramidal	6	4	positive	pyramidal	unknown	71.9367	248.828	259.018
4971	j141219a	1	4	5	negative	pyramidal	pyramidal	7	4	positive	pyramidal	unknown	126.526	324.721	348.5
4971	j141219a	1	5	5	positive	unknown	pyramidal	3	4	negative	pyramidal	pyramidal	102.288	127.195	163.222
4971	j141219b	1	5	5	negative	pyramidal	pyramidal	2	4	positive	pyramidal	pyramidal	78.0285	251.352	263.185
4971	j141219b	1	5	5	negative	pyramidal	pyramidal	3	4	positive	pyramidal	pyramidal	83.6954	198.05	215.008
5191	j150114b	1	4	5	positive	pyramidal	pyramidal	3	4	negative	pyramidal	unknown
5308	j150125a	1	4	5	positive	pyramidal	pyramidal	3	4	negative	pyramidal	unknown	23.5543	112.361	114.803
5308	j150125a	1	4	5	positive	pyramidal	pyramidal	7	4	negative	pyramidal	stellate	54.781	139.485	149.856
5308	j150125a	1	5	5	negative	pyramidal	unknown	2	4	positive	pyramidal	unknown	81.9821	135.874	158.691
5308	j150125b	1	3	5	positive	pyramidal	pyramidal	8	4	negative	pyramidal	pyramidal	125.024	280.677	307.263
5308	j150125b	1	4	5	positive	pyramidal	pyramidal	8	4	negative	pyramidal	pyramidal	143.676	324.71	355.077
5308	j150125b	1	5	5	negative	pyramidal	unknown	2	4	positive	pyramidal	unknown	68.6042	219.001	229.495
5308	j150125b	1	5	5	negative	pyramidal	unknown	7	4	positive	pyramidal	unknown	41.1323	262.628	265.829
5308	j150125b	1	6A	5	negative	pyramidal	unknown	2	4	positive	pyramidal	unknown	105.604	210.591	235.586
5308	j150125b	1	6A	5	negative	pyramidal	unknown	7	4	positive	pyramidal	unknown	6.11902	254.217	254.291
5308	j150125b	1	6B	5	negative	pyramidal	unknown	2	4	positive	pyramidal	unknown	102.751	238.039	259.268
5308	j150125b	1	6B	5	negative	pyramidal	unknown	7	4	positive	pyramidal	unknown	8.18052	281.665	281.784
5541	j150224a	1	4	5	positive	pyramidal	pyramidal	3	4	negative	pyramidal	stellate	30.1752	87.8039	92.8443
5818	j150409c	1	5	5	negative	pyramidal	pyramidal	3	4	positive	pyramidal	unknown	139.339	109.547	177.245
6558	j150731b	1	5	5	negative	pyramidal	unknown	3	4	positive	pyramidal	stellate	71.9024	14.6165	73.3729
6558	j150731b	1	5	5	negative	pyramidal	unknown	6	4	positive	pyramidal	stellate	15.909	49.7754	52.2559
11508	j160929a	1	4	5	positive	pyramidal	pyramidal	6	4	negative	pyramidal	stellate	49.8703	139.332	147.988
11509	j160929c	1	3	5	positive	pyramidal	pyramidal	6	4	negative	pyramidal	stellate	38.4498	232.187	235.349
3207	j140509a	1	3	5	positive	pyramidal	pyramidal	6	5	positive	pyramidal	unknown	121.37	123.397	173.082
3207	j140509a	1	6	5	positive	pyramidal	unknown	3	5	positive	pyramidal	pyramidal	121.37	123.397	173.082
3207	j140509c	1	3	5	positive	pyramidal	pyramidal	5	5	positive	unknown	pyramidal	54.498	160.154	169.173
3207	j140509c	1	3	5	positive	pyramidal	pyramidal	6	5	positive	pyramidal	pyramidal	38.9368	21.7965	44.6224
3207	j140509c	1	5	5	positive	unknown	pyramidal	3	5	positive	pyramidal	pyramidal	54.498	160.154	169.173
3207	j140509c	1	5	5	positive	unknown	pyramidal	6	5	positive	pyramidal	pyramidal	15.5626	138.358	139.23
3207	j140509c	1	6	5	positive	pyramidal	pyramidal	3	5	positive	pyramidal	pyramidal	38.9368	21.7965	44.6224
3207	j140509c	1	6	5	positive	pyramidal	pyramidal	5	5	positive	unknown	pyramidal	15.5626	138.358	139.23
3269	j140207b	1	3	5	positive	pyramidal	pyramidal	5	5	positive	unknown	pyramidal	100.892	38.5136	107.993
3269	j140207b	1	3	5	positive	pyramidal	pyramidal	6	5	positive	pyramidal	unknown	176.106	16.0814	176.839
3269	j140207b	1	5	5	positive	unknown	pyramidal	3	5	positive	pyramidal	pyramidal	100.892	38.5136	107.993
3269	j140207b	1	5	5	positive	unknown	pyramidal	6	5	positive	pyramidal	unknown	75.3605	22.4323	78.6283
3269	j140207b	1	6	5	positive	pyramidal	unknown	3	5	positive	pyramidal	pyramidal	176.106	16.0814	176.839
3269	j140207b	1	6	5	positive	pyramidal	unknown	5	5	positive	unknown	pyramidal	75.3605	22.4323	78.6283
3269	j140207c	1	2	5	positive	pyramidal	pyramidal	3	5	positive	pyramidal	pyramidal	52.0718	56.3416	76.7193
3269	j140207c	1	3	5	positive	pyramidal	pyramidal	2	5	positive	pyramidal	pyramidal	52.0718	56.3416	76.7193
3270	j140208a	1	5	5	positive	pyramidal	pyramidal	6	5	positive	pyramidal	pyramidal	20.9589	118.348	120.189
3270	j140208a	1	6	5	positive	pyramidal	pyramidal	5	5	positive	pyramidal	pyramidal	20.9589	118.348	120.189
3784	j140623c	1	5	5	positive	pyramidal	pyramidal	3	5	positive	pyramidal	pyramidal	32.5605	99.0876	104.3
3788	j140624b	1	4	5	positive	pyramidal	pyramidal	5A	5	positive	pyramidal	pyramidal	75.6003	33.9688	82.8812
3788	j140624b	1	4	5	positive	pyramidal	pyramidal	5B	5	positive	pyramidal	pyramidal	30.201	104.363	108.645
3788	j140624b	1	5A	5	positive	pyramidal	pyramidal	4	5	positive	pyramidal	pyramidal	75.6003	33.9688	82.8812
3788	j140624b	1	5B	5	positive	pyramidal	pyramidal	4	5	positive	pyramidal	pyramidal	30.201	104.363	108.645
3788	j140624c	1	4	5	positive	pyramidal	pyramidal	5	5	positive	pyramidal	pyramidal	2.57067	31.8563	31.9599
3788	j140624c	1	5	5	positive	pyramidal	pyramidal	4	5	positive	pyramidal	pyramidal	2.57067	31.8563	31.9599
3791	j140630a	1	3	5	positive	pyramidal	pyramidal	5	5	positive	pyramidal	pyramidal	61.6471	48.1172	78.2025
3791	j140630a	1	5	5	positive	pyramidal	pyramidal	3	5	positive	pyramidal	pyramidal	61.6471	48.1172	78.2025
3793	j140625a	1	4	5	positive	pyramidal	pyramidal	5	5	positive	unknown	pyramidal	16.2831	136.219	137.189
3793	j140625a	1	5	5	positive	unknown	pyramidal	4	5	positive	pyramidal	pyramidal	16.2831	136.219	137.189
3795	j140629a	1	4	5	positive	pyramidal	pyramidal	5	5	positive	pyramidal	pyramidal	37.1077	5.43305	37.5033
3795	j140629a	1	5	5	positive	pyramidal	pyramidal	4	5	positive	pyramidal	pyramidal	37.1077	5.43305	37.5033
3798	j140626b	1	4	5	positive	unknown	pyramidal	5	5	positive	unknown	pyramidal	54.3023	32.8241	63.452
3798	j140626b	1	5	5	positive	unknown	pyramidal	4	5	positive	unknown	pyramidal	54.3023	32.8241	63.452
4312	j140911b	1	2	5	positive	pyramidal	unknown	6	5	positive	pyramidal	unknown	29.4822	44.8435	53.6669
4312	j140911b	1	6	5	positive	pyramidal	unknown	2	5	positive	pyramidal	unknown	29.4822	44.8435	53.6669
5308	j150125b	1	3	5	positive	pyramidal	pyramidal	4	5	positive	pyramidal	pyramidal	21.7388	44.033	49.1068
5308	j150125b	1	4	5	positive	pyramidal	pyramidal	3	5	positive	pyramidal	pyramidal	21.7388	44.033	49.1068
7024	j150925a	1	2	5	positive	pyramidal	pyramidal	3	5	positive	pyramidal	pyramidal	19.0988	7.57178	20.545
7024	j150925a	1	3	5	positive	pyramidal	pyramidal	2	5	positive	pyramidal	pyramidal	19.0988	7.57178	20.545
8780	j160217a	1	3	5	positive	pyramidal	pyramidal	5	5	positive	pyramidal	pyramidal	73.5612	117.289	138.449
8780	j160217a	1	5	5	positive	pyramidal	pyramidal	3	5	positive	pyramidal	pyramidal	73.5612	117.289	138.449
8780	j160217b	1	4	5	positive	pyramidal	pyramidal	6	5	positive	pyramidal	pyramidal	18.1729	7.82652	19.7865
8780	j160217b	1	6	5	positive	pyramidal	pyramidal	4	5	positive	pyramidal	pyramidal	18.1729	7.82652	19.7865
3200	j140508b	1	4	5	positive	pyramidal	pyramidal	5	5	negative	pyramidal	pyramidal	34.8289	25.5335	43.1858
3200	j140508b	1	5	5	negative	pyramidal	pyramidal	4	5	positive	pyramidal	pyramidal	34.8289	25.5335	43.1858
3207	j140509a	1	3	5	positive	pyramidal	pyramidal	4	5	negative	pyramidal	pyramidal	54.8167	8.86644	55.5291
3207	j140509a	1	3	5	positive	pyramidal	pyramidal	5B	5	negative	unknown	pyramidal	84.3368	118.546	145.485
3207	j140509a	1	4	5	negative	pyramidal	pyramidal	3	5	positive	pyramidal	pyramidal	54.8167	8.86644	55.5291
3207	j140509a	1	4	5	negative	pyramidal	pyramidal	6	5	positive	pyramidal	unknown	68.8284	132.263	149.1
3207	j140509a	1	5B	5	negative	unknown	pyramidal	3	5	positive	pyramidal	pyramidal	84.3368	118.546	145.485
3207	j140509a	1	5B	5	negative	unknown	pyramidal	6	5	positive	pyramidal	unknown	37.0633	4.85014	37.3793
3207	j140509a	1	6	5	positive	pyramidal	unknown	4	5	negative	pyramidal	pyramidal	68.8284	132.263	149.1
3207	j140509a	1	6	5	positive	pyramidal	unknown	5B	5	negative	unknown	pyramidal	37.0633	4.85014	37.3793
3207	j140509c	1	3	5	positive	pyramidal	pyramidal	4B	5	negative	pyramidal	pyramidal	16.9345	112.125	113.397
3207	j140509c	1	4B	5	negative	pyramidal	pyramidal	3	5	positive	pyramidal	pyramidal	16.9345	112.125	113.397
3207	j140509c	1	4B	5	negative	pyramidal	pyramidal	5	5	positive	unknown	pyramidal	71.4117	48.0287	86.0603
3207	j140509c	1	4B	5	negative	pyramidal	pyramidal	6	5	positive	pyramidal	pyramidal	55.8491	90.3288	106.2
3207	j140509c	1	6	5	positive	pyramidal	pyramidal	4B	5	negative	pyramidal	pyramidal	55.8491	90.3288	106.2
3269	j140207c	1	2	5	positive	pyramidal	pyramidal	4B	5	negative	unknown	pyramidal	31.2229	74.2648	80.5614
3269	j140207c	1	2	5	positive	pyramidal	pyramidal	5	5	negative	unknown	pyramidal	4.24963	75.4813	75.6009
3269	j140207c	1	2	5	positive	pyramidal	pyramidal	6	5	negative	pyramidal	unknown	20.5451	4.32674	20.9957
3269	j140207c	1	3	5	positive	pyramidal	pyramidal	4B	5	negative	unknown	pyramidal	20.9523	17.9232	27.5725
3269	j140207c	1	3	5	positive	pyramidal	pyramidal	5	5	negative	unknown	pyramidal	49.663	19.1397	53.2236
3269	j140207c	1	3	5	positive	pyramidal	pyramidal	6	5	negative	pyramidal	unknown	70.1872	52.0149	87.3601
3269	j140207c	1	4B	5	negative	unknown	pyramidal	2	5	positive	pyramidal	pyramidal	31.2229	74.2648	80.5614
3269	j140207c	1	4B	5	negative	unknown	pyramidal	3	5	positive	pyramidal	pyramidal	20.9523	17.9232	27.5725
3269	j140207c	1	5	5	negative	unknown	pyramidal	2	5	positive	pyramidal	pyramidal	4.24963	75.4813	75.6009
3269	j140207c	1	5	5	negative	unknown	pyramidal	3	5	positive	pyramidal	pyramidal	49.663	19.1397	53.2236
3269	j140207c	1	6	5	negative	pyramidal	unknown	2	5	positive	pyramidal	pyramidal	20.5451	4.32674	20.9957
3269	j140207c	1	6	5	negative	pyramidal	unknown	3	5	positive	pyramidal	pyramidal	70.1872	52.0149	87.3601
3270	j140208a	1	4	5	negative	pyramidal	pyramidal	5	5	positive	pyramidal	pyramidal	81.5361	5.98618	81.7555
3270	j140208a	1	4	5	negative	pyramidal	pyramidal	6	5	positive	pyramidal	pyramidal	96.0439	124.334	157.109
3270	j140208a	1	5	5	positive	pyramidal	pyramidal	4	5	negative	pyramidal	pyramidal	81.5361	5.98618	81.7555
3270	j140208a	1	6	5	positive	pyramidal	pyramidal	4	5	negative	pyramidal	pyramidal	96.0439	124.334	157.109
3270	j140208b	1	4B	5	negative	pyramidal	unknown	5	5	positive	pyramidal	pyramidal	69.1167	2.41495	69.1588
3270	j140208b	1	5	5	positive	pyramidal	pyramidal	4B	5	negative	pyramidal	unknown	69.1167	2.41495	69.1588
3270	j140208c	1	4	5	negative	pyramidal	pyramidal	5	5	positive	unknown	pyramidal	12.0918	74.6931	75.6655
3270	j140208c	1	5	5	positive	unknown	pyramidal	4	5	negative	pyramidal	pyramidal	12.0918	74.6931	75.6655
3305	j140523a	1	5	5	negative	pyramidal	unknown	4	5	positive	pyramidal	unknown	11.934	100.497	101.203
3784	j140623a	1	3	5	negative	pyramidal	pyramidal	7	5	positive	pyramidal	pyramidal	81.4992	71.3355	108.309
3784	j140623a	1	4	5	negative	pyramidal	pyramidal	7	5	positive	pyramidal	pyramidal	11.3048	127.136	127.638
3784	j140623a	1	6	5	negative	pyramidal	pyramidal	7	5	positive	pyramidal	pyramidal	9.07504	64.9318	65.5629
3784	j140623a	1	7	5	positive	pyramidal	pyramidal	3	5	negative	pyramidal	pyramidal	81.4992	71.3355	108.309
3784	j140623a	1	7	5	positive	pyramidal	pyramidal	6	5	negative	pyramidal	pyramidal	9.07504	64.9318	65.5629
3784	j140623b	1	4	5	positive	pyramidal	pyramidal	5	5	negative	pyramidal	pyramidal	28.1608	102.62	106.414
3784	j140623b	1	5	5	negative	pyramidal	pyramidal	4	5	positive	pyramidal	pyramidal	28.1608	102.62	106.414
3784	j140623c	1	4	5	negative	pyramidal	pyramidal	5	5	positive	pyramidal	pyramidal	44.8	0.234495	44.8007
3784	j140623c	1	5	5	positive	pyramidal	pyramidal	4	5	negative	pyramidal	pyramidal	44.8	0.234495	44.8007
3784	j140623c	1	5	5	positive	pyramidal	pyramidal	6	5	negative	pyramidal	pyramidal	40.7059	83.6753	93.0512
3784	j140623c	1	6	5	negative	pyramidal	pyramidal	3	5	positive	pyramidal	pyramidal	72.7108	15.4123	74.3263
3784	j140623c	1	6	5	negative	pyramidal	pyramidal	5	5	positive	pyramidal	pyramidal	40.7059	83.6753	93.0512
3788	j140624b	1	4	5	positive	pyramidal	pyramidal	5C	5	negative	pyramidal	unknown	54.5022	152.509	161.955
3788	j140624b	1	5C	5	negative	pyramidal	unknown	4	5	positive	pyramidal	pyramidal	54.5022	152.509	161.955
3791	j140630a	1	3	5	positive	pyramidal	pyramidal	4	5	negative	pyramidal	pyramidal	12.6561	3.27491	13.073
3791	j140630a	1	4	5	negative	pyramidal	pyramidal	3	5	positive	pyramidal	pyramidal	12.6561	3.27491	13.073
3791	j140630a	1	4	5	negative	pyramidal	pyramidal	5	5	positive	pyramidal	pyramidal	49.8664	51.3921	71.6087
3791	j140630a	1	5	5	positive	pyramidal	pyramidal	4	5	negative	pyramidal	pyramidal	49.8664	51.3921	71.6087
3791	j140630b	1	4	5	negative	unknown	pyramidal	5	5	positive	unknown	pyramidal	25.9907	135.504	137.974
3791	j140630b	1	5	5	positive	unknown	pyramidal	4	5	negative	unknown	pyramidal	25.9907	135.504	137.974
3793	j140625b	1	4	5	negative	pyramidal	pyramidal	5	5	positive	pyramidal	pyramidal	3.92777	32.7108	32.9458
3793	j140625b	1	5	5	positive	pyramidal	pyramidal	4	5	negative	pyramidal	pyramidal	3.92777	32.7108	32.9458
3793	j140625c	1	4	5	negative	pyramidal	pyramidal	5	5	positive	pyramidal	pyramidal	40.7891	51.1401	65.4145
3793	j140625c	1	5	5	positive	pyramidal	pyramidal	4	5	negative	pyramidal	pyramidal	40.7891	51.1401	65.4145
3793	j140625c	1	5	5	positive	pyramidal	pyramidal	6	5	negative	pyramidal	pyramidal	34.0269	109.495	114.66
3793	j140625c	1	6	5	negative	pyramidal	pyramidal	5	5	positive	pyramidal	pyramidal	34.0269	109.495	114.66
3794	j140627a	1	4	5	positive	pyramidal	pyramidal	6	5	negative	unknown	pyramidal	7.64166	217.443	217.577
3794	j140627a	1	6	5	negative	unknown	pyramidal	4	5	positive	pyramidal	pyramidal	7.64166	217.443	217.577
3795	j140629a	1	3	5	negative	pyramidal	unknown	4	5	positive	pyramidal	pyramidal	10.6313	88.7586	89.3931
3795	j140629a	1	3	5	negative	pyramidal	unknown	5	5	positive	pyramidal	pyramidal	35.757	94.1917	100.75
3795	j140629a	1	4	5	positive	pyramidal	pyramidal	3	5	negative	pyramidal	unknown	10.6313	88.7586	89.3931
3795	j140629a	1	5	5	positive	pyramidal	pyramidal	3	5	negative	pyramidal	unknown	35.757	94.1917	100.75
3798	j140626a	1	5	5	negative	pyramidal	pyramidal	7	5	positive	pyramidal	pyramidal	8.57794	47.5855	48.3525
3798	j140626a	1	6	5	negative	pyramidal	pyramidal	7	5	positive	pyramidal	pyramidal	19.4326	34.2461	39.3754
3798	j140626a	1	7	5	positive	pyramidal	pyramidal	5	5	negative	pyramidal	pyramidal	8.57794	47.5855	48.3525
3798	j140626a	1	7	5	positive	pyramidal	pyramidal	6	5	negative	pyramidal	pyramidal	19.4326	34.2461	39.3754
4312	j140911a	1	4	5	positive	pyramidal	pyramidal	5	5	negative	pyramidal	unknown	15.4968	74.4511	76.0468
4312	j140911b	1	2	5	positive	pyramidal	unknown	3	5	negative	pyramidal	unknown	78.0497	88.9574	118.343
4312	j140911b	1	2	5	positive	pyramidal	unknown	4	5	negative	pyramidal	pyramidal	33.6407	106.078	111.285
4312	j140911b	1	2	5	positive	pyramidal	unknown	5	5	negative	pyramidal	pyramidal	69.9706	135.592	152.582
4312	j140911b	1	3	5	negative	pyramidal	unknown	2	5	positive	pyramidal	unknown	78.0497	88.9574	118.343
4312	j140911b	1	3	5	negative	pyramidal	unknown	6	5	positive	pyramidal	unknown	105.589	44.1139	114.434
4312	j140911b	1	4	5	negative	pyramidal	pyramidal	2	5	positive	pyramidal	unknown	33.6407	106.078	111.285
4312	j140911b	1	4	5	negative	pyramidal	pyramidal	6	5	positive	pyramidal	unknown	10.1729	61.2346	62.0738
4312	j140911b	1	5	5	negative	pyramidal	pyramidal	2	5	positive	pyramidal	unknown	69.9706	135.592	152.582
4312	j140911b	1	5	5	negative	pyramidal	pyramidal	6	5	positive	pyramidal	unknown	44.066	90.7489	100.882
4312	j140911b	1	6	5	positive	pyramidal	unknown	3	5	negative	pyramidal	unknown	105.589	44.1139	114.434
4312	j140911b	1	6	5	positive	pyramidal	unknown	4	5	negative	pyramidal	pyramidal	10.1729	61.2346	62.0738
4312	j140911b	1	6	5	positive	pyramidal	unknown	5	5	negative	pyramidal	pyramidal	44.066	90.7489	100.882
4965	j141216a	1	4	5	positive	pyramidal	unknown	5B	5	negative	pyramidal	pyramidal	83.8804	34.6272	90.7467
[truncated: 50 more rows]
